# Supplementary material
Source: HighWire-hosted journal article supplement (https://erj.ersjournals.com/content/53/6/1801214)

## ONLINE SUPPLEMENT

### ERS Statement on Respiratory Muscle Testing at Rest and during Exercise

Pierantonio Laveneziana<sup>1,2,34</sup>, Andre Albuquerque<sup>3,4</sup>, Andrea Aliverti<sup>5</sup>, Tony Babb<sup>6</sup>, Esther Barreiro<sup>7</sup>, Martin Dres<sup>1,8</sup>, Bruno-Pierre Dubé<sup>9,10</sup>, Brigitte Fauroux<sup>11</sup>, Joaquim Gea<sup>12</sup>, Jordan A. Guenette<sup>13,14</sup>, Anna L. Hudson<sup>15</sup>, Hans-Joachim Kabitz<sup>16</sup>, Franco Laghi<sup>17,18</sup>, Daniel Langer<sup>19,20</sup>, Yuan-Ming Luo<sup>21</sup>, J. Alberto Neder<sup>22</sup>, Denis O'Donnell<sup>23</sup>, Michael I. Polkey<sup>24</sup>, Roberto A. Rabinovich<sup>25,26</sup>, Andrea Rossi<sup>27</sup>, Frédéric Series<sup>28</sup>, Thomas Similowski<sup>1,8</sup>, Christina Spengler<sup>29</sup>, Ioannis Vogiatzis<sup>30,31,32</sup> and Samuel Verges<sup>33,34</sup>

<sup>1</sup>Sorbonne Université, INSERM, UMRS1158 Neurophysiologie respiratoire expérimentale et clinique, Paris, France.

<sup>2</sup>AP-HP, Groupe Hospitalier Pitié-Salpêtrière Charles Foix, Service des Explorations Fonctionnelles de la Respiration, de l'Exercice et de la Dyspnée du Département R3S, Paris, France.

<sup>3</sup>Pulmonary Division, Heart Institute (InCor), University of São Paulo Medical School, São Paulo, Brazil.

<sup>4</sup>Sírio-Libanês Teaching and Research Institute, São Paulo, Brazil.

<sup>5</sup>Dipartimento di Elettronica, Informazione e Bioingegneria, Politecnico di Milano, Milan, Italy.

<sup>6</sup>Institute for Exercise and Environmental Medicine, Texas Health Presbyterian Hospital Dallas and UT Southwestern Medical Center, Dallas, TX, USA.

<sup>7</sup>Pulmonology Department-Muscle and Respiratory System Research Unit (URMAR), CEXS,

IMIM-Hospital del Mar, UPF, CIBERES, Barcelona, Spain.

<sup>8</sup>AP-HP, Groupe Hospitalier Pitié-Salpêtrière Charles Foix, Service de Pneumologie, Médecine Intensive et Réanimation du Département R3S, Paris, France.

<sup>9</sup>Département de Médecine, Service de Pneumologie, Centre Hospitalier de l'Université de Montréal (CHUM), Montréal, QC, Canada.

<sup>10</sup>Centre de Recherche du Centre Hospitalier de l'Université de Montréal (CRCHUM) – Carrefour de l'Innovation et de l'Évaluation en Santé, Montréal, QC, Canada.

<sup>11</sup>AP-HP, Hôpital Necker, unité de ventilation noninvasive et du sommeil de l'enfant et université Paris Descartes, Paris, France.

<sup>12</sup>Servei de Pneumologia, Hospital del Mar DCEXS, Universitat Pompeu Fabra, CIBERES (ISCiii), BRN, Barcelona, Spain.

<sup>13</sup>Dept of Physical Therapy, University of British Columbia, Vancouver, BC, Canada.

<sup>14</sup>Centre for Heart Lung Innovation, Providence Health Care Research Institute, University of British Columbia, Vancouver, BC, Canada.

<sup>15</sup>Neuroscience Research Australia and University of New South Wales, Sydney, Australia.

<sup>16</sup>Dept of Internal Medicine II, Pneumology, Cardiology, Intensive Care Medicine, Academic Teaching Hospital Konstanz, Konstanz, Germany.

<sup>17</sup>Loyola University of Chicago Stritch School of Medicine, Maywood, IL, USA.

<sup>18</sup>Hines Veterans Affairs Hospital, Hines, IL, USA.

<sup>19</sup>Dept of Rehabilitation Sciences, Research Group for Cardiovascular and Respiratory Rehabilitation, KU Leuven - University of Leuven, Leuven, Belgium.

<sup>20</sup>Respiratory Rehabilitation and Respiratory Division, University Hospital Leuven, Leuven, Belgium.

<sup>21</sup>State Key Laboratory of Respiratory Disease, the First Affiliated Hospital of Guangzhou

Medical University, Guangzhou, China.

<sup>22</sup>Laboratory of Clinical Exercise Physiology (LACEP), Division of Respiratory and Critical Care Medicine, Dept of Medicine, Queen's University and Kingston General Hospital, Kingston, ON, Canada.

<sup>23</sup>Respiratory Investigation Unit (RIU), Division of Respiratory and Critical Care Medicine, Dept of Medicine, Queen's University and Kingston General Hospital, Kingston, ON, Canada.

<sup>24</sup>Dept of Respiratory Medicine, Royal Brompton Hospital, London, UK.

<sup>25</sup>ELEGI Colt Laboratory, Centre for Inflammation Research, The Queen's Medical Research Institute, University of Edinburgh, Edinburgh, UK.

<sup>26</sup>Respiratory Medicine Dept, Royal Infirmary of Edinburgh, Edinburgh, UK.

<sup>27</sup>Pulmonary Unit, General Hospital, University of Verona, Verona, Italy.

<sup>28</sup>Centre de recherche Institut Universitaire de Cardiologie et de Pneumologie de Québec, Université Laval, Québec, QC, Canada.

<sup>29</sup>Exercise Physiology Lab, Institute of Human Movement Sciences and Sport, ETH Zurich; Zurich Center for Integrative Human Physiology (ZIHP), University of Zurich, Zurich, Switzerland.

<sup>30</sup>Columbia, St. Paul's Hospital, Vancouver, BC, Canada.

<sup>31</sup>National and Kapodistrian University of Athens, Faculty of Physical Education and Sports Sciences, Athens, Greece.

<sup>32</sup>Northumbria University Newcastle, Dept of Sport, Exercise and Rehabilitation, Newcastle, UK.

<sup>33</sup>Hypoxia Physiopathology laboratory (HP2), INSERM U1042, Grenoble Alpes University, Grenoble, France.

<sup>34</sup>P. Laveneziana and S. Verges are the project co-chairs.

**Corresponding Author**

Pierantonio Laveneziana, Service d'Explorations Fonctionnelles de la Respiration, de l'Exercice et de la Dyspnée, Département "R3S" (Respiration, Réanimation, Réhabilitation, Sommeil), Pôle PRAGUES, Hôpital Universitaire Pitié-Salpêtrière, Assistance Publique-Hôpitaux de Paris (AP-HP), 47-83 Boulevard de l'Hôpital, 75013, Paris, France; Tel: 00 33 (0) 1 42 17 85 84; Fax: 00 33 (0) 1 42 17 85 76; email: [pierantonio.laveneziana@aphp.fr](mailto:pierantonio.laveneziana@aphp.fr)

**Authors' contributions:** all authors contributed to the content, writing and final approval of the manuscript.

## **1. Respiratory muscle function**

### **1.1 Airway opening, oesophageal and gastric pressures: technical considerations**

#### **1.1.1 Airway opening**

In most individuals, changes in airway pressure ( $P_{ao}$ ) accurately reflect the corresponding changes of alveolar pressure ( $P_{alv}$ ) generated by respiratory muscle contractions, even during dynamic manoeuvres when it is necessary to have a fast transmission of  $P_{alv}$  to the airway opening [1]. The speed of this pressure transmission is affected by the flow resistance of the airways and by the compliance of the extrathoracic airways, and the compliance of the equipment [1]. In practice, however, compressibility of gas in the extra-thoracic airways does not pose a real obstacle to the transmission of  $P_{alv}$  to the airway opening [1]. In patients with severe airway obstruction the delay in pressure transmission to the airway opening may cause underestimation of  $\Delta P_{alv}$  [2].

Measurements of  $P_{ao}$  during brief inspiratory occlusions (typically 0.1 second) applied without warning before the individual recognizes the occlusion and reacts to it (i.e.  $P_{0.1}$ ) are a useful index of respiratory centre motor output [3].  $P_{0.1}$  has three determinants: (1) the neural command, (2) the conduction of the neural signal to the inspiratory muscles and (3) the pressure-generating capacity of the inspiratory muscles. Accordingly, a high value of  $P_{0.1}$  always indicates intense neuroventilatory activity whereas low values may be difficult to interpret.  $P_{0.1}$  is measured at the airway opening, accordingly, in presence of intrinsic positive end expiratory pressure (PEEP),  $P_{0.1}$  may underestimate respiratory centre motor output.

Being generated by inspiratory efforts,  $P_{0.1}$  values represent negative pressures, yet they are usually reported in positive units. In healthy subjects, the values of  $P_{0.1}$  usually range between 0.5 and 1.5 cmH<sub>2</sub>O during resting breathing [4]. The corresponding values in stable patients with chronic obstructive pulmonary diseases (COPD) range between 2.5 and 5 cmH<sub>2</sub>O [4].  $P_{0.1}$  has been used to monitor respiratory centre motor output at rest and during exercise in young and elderly healthy subjects [5], in ambulatory children with cystic fibrosis (CF) [6], in ambulatory patients with COPD [7] and heart failure [8], in patients with neuromuscular disorders (NMD) [9], during titration of ventilator support [10, 11], weaning from mechanical ventilation [12] and to predict post extubation respiratory failure [13].

### 1.1.2. Oesophageal and gastric pressures

Oesophageal pressure ( $P_{oes}$ ) and gastric pressure ( $P_{ga}$ ) recordings provide valuable data on respiratory mechanics and respiratory muscle activity [14]. For instance, tidal changes in pleural pressure ( $\Delta P_{pl}$ ) are accurately tracked by tidal changes in  $P_{oes}$  ( $\Delta P_{oes}$ ) even in the supine position [1]. Swings in  $P_{oes}$  are obtained recording inspiratory ( $P_{oes,insp}$ ) and expiratory ( $P_{oes,exp}$ ) oesophageal pressures as the most negative and positive pressures during tidal breathing, respectively. The tidal  $P_{oes}$  swing ( $P_{oes,tid}$ ) is the amplitude of the waveform between these two points (see figure 3). Other computations of respiratory muscle effort include work of breathing (WOB), pressure time product (PTP) and tension-time index (TTI) (*see 1.4.2 Indices of respiratory muscle effort*).

$P_{oes}$  measured in supine critically ill patients is often greater than what many assume to be likely pleural pressures [15]. Factors that contribute to this finding may include the weight of mediastinal contents and a concurrent variable elevation of pressure within the coelomic cavity [15]. These mechanism, however, have been put into question by recent experimental findings in lung-injured pigs and human cadavers [16].

Simultaneous recordings of  $P_{oes}$  and  $P_{ga}$  can be plotted against each other to obtain the so called “pleural pressure-abdominal pressure diagram” [17]. With this diagram, it is possible to estimate the relative contributions of the diaphragm, rib cage inspiratory muscles, and abdominal muscles to tidal breathing [18]. The diagram also indicates how these muscles are coordinated during ventilation under different conditions [18]. In addition, simultaneous measurements of  $P_{oes}$  and  $P_{ga}$  permit the calculation of transdiaphragmatic pressure ( $P_{di} = P_{ga} - P_{oes}$ ) [18]. Measurement of  $P_{di}$  is especially helpful in the diagnosis of severe weakness or paralysis of the diaphragm (see below). The ratio of  $P_{ga}$  over  $P_{di}$  is an estimator of diaphragm contribution to the tidal breathing [1]. A negative ratio suggests diaphragm dysfunction.

Despite data showing its usefulness in critically ill patients,  $P_{oes}$ ,  $P_{ga}$  and  $P_{di}$  are still hardly used in the clinical setting [2]. This is partially due to technical issues, such as the insertion and proper placement of the catheters, the feasibility of obtaining accurate measurements, and the interpretation of the measurements.

## 1.2 Voluntary tests of respiratory muscle strength

### 1.2.1 Maximal static inspiratory (P<sub>I</sub>max) and expiratory (P<sub>E</sub>max) mouth pressure

Measurements of maximal static respiratory pressures during forceful inspiratory (P<sub>I</sub>max) and expiratory (P<sub>E</sub>max) efforts against an occluded airway reflect global inspiratory and expiratory muscle strength [18]. When the airway is occluded and the glottis is open, mouth pressure equals P<sub>alv</sub> and reflects the pressure across the entire respiratory system [1].

P<sub>I</sub>max and P<sub>E</sub>max vary with lung volume. This is because of the force–length relationship of the respiratory muscles and the varying contribution of passive elastic recoil pressure of the respiratory system [18]. Other sources of P<sub>I</sub>max and P<sub>E</sub>max variability include the type of mouthpiece used, the pressure being evaluated (peak or plateau) and the number of trials performed. To standardize the measurement of P<sub>I</sub>max and P<sub>E</sub>max, it has been recommended to measure the former at or close to residual volume (RV) and the latter at or close to total lung capacity (TLC), although measuring P<sub>I</sub>max at functional residual capacity (FRC) can also be an option to assess maximal inspiratory muscle strength close to operational lung volume [19].

Recordings of P<sub>I</sub>max and P<sub>E</sub>max should be obtained by an experienced operator, who should strongly urge subjects to make maximum inspiratory (*Mueller manoeuvre*) and maximal expiratory (*Valsalva manoeuvre*) efforts. During testing, subjects are normally seated. They need coaching to prevent air leaks around the mouthpiece. Once the operator is satisfied, the maximum value of three inspiratory manoeuvres or three expiratory manoeuvres that vary by less than 10% are recorded. The system requires a small air leak (approximately 2-mm internal diameter and 20–30 mm in length) to prevent glottic closure during the P<sub>I</sub>max manoeuvre and to reduce the use of buccal muscles during the P<sub>E</sub>max manoeuvre.

Ideally, inspiratory and expiratory pressures must be maintained for at least 1.5 s. This allows to record and report the maximum pressure sustained for 1 s. Pressure transducers should be connected to a computer screen to give visual feedback to the subject being tested through the display of the pressure-time curves and for the computations of the 1-sec plateau pressure. For clinical use, flanged mouthpieces are recommended even though they result in somewhat lower pressure values, especially for P<sub>E</sub>max [19].

Reliability of the test is good if at least 5 attempts are performed, and better after an initial warm-up of the respiratory muscles [19–21]. Peak values should typically be achieved after 5–6 efforts for P<sub>E</sub>max [21], and after 9 efforts for P<sub>I</sub>max [20].

In the previous ATS/ERS statement on respiratory muscle testing, a P<sub>I</sub>max of less than -80 cmH<sub>2</sub>O was proposed as a practical threshold to exclude clinically important inspiratory muscle weakness [19]. Alternatively, weakness can be defined based on the lower limit of the normal P<sub>I</sub>max using specific equations. In such a case, the presence or absence of respiratory muscle weakness is critically dependent upon the specific predictive equation being used [22]. For example, in a study of more than 1500 subjects, Rodriques et al. [22] reported that the prevalence of weakness ranged from 33.4 to 66.9% according to the reference equation being used. In addition, the investigators noted how some predictive equations do relate better to clinical and physiologic indicators of respiratory muscles weakness. These observations suggest that there are specific predictive equations that might be particularly useful in screening patients for advanced respiratory neuromuscular assessment (see tables S2 and S4 for more details) [22].

P<sub>I</sub>max can be affected by specific training [23]. Learning effects need to be acknowledged and sufficient baseline trials (at least 5 manoeuvres) have to be performed. Exercise of relatively short duration (<30 min) at high or maximal intensity (>75% VO<sub>2</sub>max) results in reductions in P<sub>I</sub>max both in trained and in untrained individuals [24, 25]. These observations have been interpreted as a sign of exercise-induced respiratory muscle fatigue. Reductions in P<sub>I</sub>max have also been reported following marathon running in non-elite athletes who typically run for more than 3 h at a moderate exercise intensity (<70% VO<sub>2</sub>max) [26].

**Paediatrics.** Measurements of P<sub>I</sub>max and P<sub>E</sub>max are restricted to cooperative children older than 6-8 years of age (table S14). Alternative techniques (airway pressure during crying as a surrogate for both P<sub>I</sub>max and P<sub>E</sub>max and mouth whistle pressure as a surrogate for P<sub>E</sub>max) are described below. The minimal number of measurements has not been validated in children. As children may be unable to comply with technical quality standards, peak inspiratory and expiratory pressures may then be used as simpler tests, and have shown their usefulness to predict severe chest infection in children with NMDs [27].

In children, maximal pressures increase with age, and, as in adults, they are greater in males than in females [28]. Normal values have been established in large series of children of different ethnicities [28-32]. By 11-12 years of age, adult P<sub>I</sub>max values are reached in both sexes. Maximal pressures measured in infants and children are surprisingly high compared to adults. This seems to be related to the small radius of curvature of the rib cage, diaphragm, and abdomen, that according to the Laplace relationship, converts small tensions into relatively high



pressures [33]. Recordings of P<sub>I</sub>max and P<sub>E</sub>max have a limited value in children with NMDs disease (Duchenne) because they are too difficult to perform [34].

In infants, mouth pressures generated during crying may provide an index of global respiratory muscle strength [35, 36]. The firm application of a rubber cushion mask against the face of an infant is generally sufficient to provoke crying efforts. An artificial leak in the mask prevents glottic closure. Only peak pressures can be recorded during crying. Mean peak crying P<sub>I</sub>max was  $-118 \pm 21$  cmH<sub>2</sub>O in a large group of healthy infants between the age of one month and two years and was independent of age and sex [36]. In some studies, mean peak crying P<sub>E</sub>max was  $125 \pm 35$  cm H<sub>2</sub>O and was related to body weight [36]. The main advantage of this test is its simplicity. Moreover, it is valuable in the assessment of infants with NMDs [35].

Mouth whistle pressure (P<sub>m</sub>W) is a simple and reproducible test to evaluate expiratory muscle strength in patients with amyotrophic lateral sclerosis (ALS) without bulbar dysfunction [37]. In children, P<sub>m</sub>W has the great advantage of its simplicity, audible feedback, playfulness and non-invasiveness. Aloui et al. [38] recently reported that P<sub>m</sub>W was closely related to oesophageal whistle pressure and gastric whistle pressure in children with NMDs. This observation confirms that noninvasive mouth pressure is a reliable reflection of P<sub>oes</sub> and P<sub>ga</sub> measurements in children and young adults with NMDs. P<sub>E</sub>max and P<sub>m</sub>W were also highly related although with wide limits of agreement, mainly due to greater differences for the highest values. Indeed, a good agreement between the two tests was found to detect expiratory muscle weakness with 92% of the children being diagnosed as having muscle weakness by both tests.

**ICU.** Bendix and Bunker were among the first investigators to suggest that MIP might provide a useful reflection of respiratory reserve [39]. Patients who generate a P<sub>I</sub>max of -20 cmH<sub>2</sub>O during a 30-s occlusion of the airway are considered to display sufficient recovery from neuromuscular blockade to tolerate transfer to the recovery room. In a classic study, Sahn and Lakshminarayan [40] reported that all patients with a P<sub>I</sub>max more negative than -30 cmH<sub>2</sub>O were successfully weaned, whereas all patients with a P<sub>I</sub>max less negative than -20 cmH<sub>2</sub>O failed a weaning trial. Unfortunately, the accuracy of P<sub>I</sub>max in predicting weaning outcome varies considerably among studies. This is not surprising considering that studies differ in the technique for P<sub>I</sub>max recording (duration of occlusion), design (prospective, retrospective), methods of weaning (T-tube, pressure support, intermittent mandatory ventilation), definition of weaning success and failure. In patients requiring short-term mechanical ventilation, P<sub>I</sub>max commonly does not

differentiate between weaning success and weaning failure patients [12, 41-44]. Measurements of P<sub>E</sub>max are not routinely used in intubated patients.

Voluntary manoeuvres are not always possible in the ICU due to poor patient cooperation. Other parameters may therefore be considered:

*Airway pressure contour.* Airway pressures of mechanically ventilated patients are continuously monitored. Any deviation from the relaxed configuration may indicate active contraction of inspiratory muscles.

*Breathing pattern.* Tidal volume (V<sub>T</sub>), respiratory rate (RR) and minute ventilation are easy to measure in intubated patients, and their values are continuously displayed on virtually all modern ventilators. Rapid shallow breathing is common in critically ill patients. Several challenges are susceptible to induce rapid shallow breathing including increased respiratory load, chemoreceptor stimulation, altered neuromechanical transmission, anxiety, fear and cortical influence. In the context of separation from mechanical ventilation, rapid shallow breathing is more likely to appear in patients failing a weaning attempt. Accordingly, RR/V<sub>T</sub> ratio is used as a predictor of weaning failure [41].

### **1.2.2 Maximal sniff nasal inspiratory pressure (SNIP)**

The amplitude of a SNIP is not specific of diaphragm contraction because sniffing results from the coordinated action of several inspiratory muscles [45]. The high correlation between SNIP and P<sub>oes</sub> usually reported in healthy individuals [46, 47] is reduced in patients with airflow obstruction [46, 47] or individuals with nasal obstruction [48]. SNIP measurements in different populations are reproducible and, compared to P<sub>I</sub>max, are less prone to learning effects [49, 50]. In healthy subjects [51] and in patients with COPD [52], SNIP values have good within subject and between occasion repeatability.

The agreement between SNIP and P<sub>I</sub>max is variable. It has been suggested that when evaluating patients suspected of having inspiratory muscle weakness these two tests should be regarded as complementary and not interchangeable [48, 53].

SNIP is often recorded in the seated position. To avoid air leaks, one nostril is completely occluded by the pressure sensor (plug), while the other nostril is kept open. Often both nostrils are tested with 1 to 3 SNIP runs and the nostril conducive to the higher values is used for further testing.

While at FRC, subjects are instructed to make a short and fast sniff such that the peak pressure is not sustained. The duration of the sniff should be < 500 ms. Usually, 10 trials are sufficient to reach a plateau in SNIP values – and the highest value is selected [49]. More than 10 tests might be necessary when the SNIP value is below normal or to follow disease progression. SNIP have been successfully recorded in healthy individuals [50, 51, 54, 55], in patients with a variety of disease process including patients with COPD [52, 56, 57] and patients with NMDs [58-60].

The precision of SNIP to reflect swings in  $P_{oes}$  is good in healthy individuals [61, 62] and, as already noted, is reduced in patients with airflow obstruction [46, 47] and in patients with nasal obstruction [48]. The repeatability of SNIP, even in patients with COPD, is good [52].

There is a lack of studies on the prognostic role of SNIP in respiratory diseases. In a retrospective study in patients with severe COPD, SNIP was a better predictor of mortality than inspiratory capacity (IC)/TLC [57]. This topic merits further studies, considering that even patients with mild COPD display a reduced SNIP [56].

SNIP is less frequently used than P<sub>I</sub>max. In one study conducted in patients with moderate to severe COPD, inspiratory muscle training improved the perception of well-being and P<sub>I</sub>max, but not SNIP [63]. Lung volume reduction surgery results in improvements in SNIP one month after surgery; improvements in SNIP, however, do not correlate with improvements in exercise capacity, dyspnoea and lung function [64].

Four groups of investigators have published SNIP reference values for healthy adults [54, 55, 65, 66], and one group has published SNIP reference values for healthy children [67] (see table S9). Higher SNIP values were found in males and, in most studies, there is a positive correlation with age [54, 55, 66, 67]. The lower limit of a normal SNIP is around -70 cmH<sub>2</sub>O in males and -60 cmH<sub>2</sub>O in females, which was in agreement with the previous ATS/ERS statement [19]. The lower limits of a normal SNIP are significantly less in Japanese and Taiwanese individuals [55, 65]. Accordingly, when assessing a given individual, reference values obtained from the individual's population of origin should be used.

**Paediatrics.** SNIP is a natural and simple manoeuvre that most children > 2 years of age can easily perform [67-70]. SNIP values in healthy children (> 6 years old) are similar to those recorded in healthy adults [67]. In healthy children and in children with inspiratory muscle weakness, SNIP provides a reasonable estimate of the inspiratory muscle strength [71].

As in adults, the main limitation of SNIP in children is the underestimation of inspiratory muscle

strength in case of nasal obstruction (e.g., enlarged adenoids, nasal polyps), severe respiratory muscle weakness and airway obstruction (e.g., cystic fibrosis) [68].

Because of its simplicity, SNIP should be part of the routine evaluation of muscle strength in children with NMDs. SNIP was one of the 4 respiratory lung or muscle parameters that declined significantly with age in boys with Duchenne muscular dystrophy [34]. In these boys, SNIP declines earlier than peak expiratory flow (PEF) [72].

**ICU.** SNIP measurements are not possible in intubated patients, since there is no communication between the airway and the nostril (see below on the use of flap valves connected to the endotracheal tube to mimic sniff testing in intubated patients [73]).

### **1.2.3 Peak cough flow (PCF)**

Peak cough flow (PCF) – also known as cough peak expiratory flow – has been described as early as 1966 [74]. The effectiveness of mucus clearance depends, among other factors, on an adequate PCF [75]. The act of coughing consists of the following steps: (1) inhalation ranging from 50% of VT to 50% of VC [76], (2) tight glottic closure, (3) contraction of the expiratory muscles with the attendant rise in intrathoracic pressure to around 70 cmH<sub>2</sub>O to 400 cmH<sub>2</sub>O [76], (4) glottic reopening with biphasic turbulent air blast – with an initial peak (i.e., PCF) occurring within 30-50 ms after the glottic opening, followed by a flow-plateau phase of 200-500 ms when airflow is approximately 50% or less of PCF [75, 77].

PCF is usually measured with a hand-held, portable peak flow meter (PFM) [78]. While sitting up straight [78], subjects are instructed to inhale maximally and place the PFM mouthpiece in their mouth and seal their lips and teeth tightly around the mouthpiece. Then, subjects are instructed to cough as hard as they can. Usually, subjects repeat the procedure until they generate three PCF readings with <5% of each other. The highest of these three values is then reported [78].

There is a strong correlation and narrow limits of agreement between PCF values assessed via the pneumotachograph of a spirometer and the PCF values recorded with a portable PFM [78]. When PCF is <270 l·min<sup>-1</sup>, peak flow can be overestimated by the PFM [78].

PCF has been proposed to monitor expiratory muscle weakness and potential bulbar involvement in patients with NMD [79]. PCF <270 l·min<sup>-1</sup> have been associated with increased of pulmonary complications during respiratory tract infections in patients with NMDs [78, 80]. In these

patients, the indication of manual / mechanical exsufflator/insufflator therapy is – among other criteria – based on PCF values.

Precise threshold values for PCF are not available [78]. Healthy subjects have been reported to reach mean PCF values of approximately 468 to 588 l·min<sup>-1</sup> (significantly lower values for women than men); patients with NMDs achieve lower PCF values according to the type and stage of the disease [78, 81].

**Paediatrics.** Reference PCF values are available for children [82] (table S14). As for P<sub>I</sub>max and P<sub>E</sub>max, children with NMDs can find it difficult to perform PCF manoeuvres – this is why in children with NMDs PCF values not necessarily correlate with age [34]. The PCF threshold for successful mucus expectoration in children with NMD has been reported to be >160 l·min<sup>-1</sup> [27].

**ICU.** Intubated patients cannot close their glottis. Accordingly, intubated patients cannot properly cough. This means that in these patients it is impossible to measure PCF. Intubated patients, however, can huff [83]. The strength of a huff can be quantified measuring PEF during the huff. Cooperative patients can generate huffs. In non-cooperative patients (e.g., delirious, psychiatric conditions etc.), huffing can be induced using aerosolized normal saline solution [83]. In intubated patients, PEF less than 35 l·min<sup>-1</sup> [84], 60 l·min<sup>-1</sup> [85], 70 l·min<sup>-1</sup> [86], or 80 l·min<sup>-1</sup> [87], have been associated with extubation failure. This wide range of PEF thresholds plus the fact that all studies were single-centred and were carried out in specific patient population prevent the widespread adoption of this measurement in clinical decision making in intubated patients.

### 1.3 Voluntary manoeuvres with oesophageal and gastric pressures

Recordings of P<sub>oes</sub> and P<sub>ga</sub> signals during voluntary manoeuvres such as a sniff and a cough are useful in assessing respiratory muscle strength when non-invasive measures fail to provide clinically meaningful information due to anatomical, functional or behavioural causes. P<sub>oes</sub> recordings during a sniff are particularly useful when SNIP yields suspiciously low values such in patients with upper airway obstruction (hypertrophy of the adenoids, rhinitis, polyps) or lower airway obstruction (children with CF) [68]. P<sub>ga</sub> recordings during a cough are needed, for example, when the glottis function is compromised [88] such as in patients with bulbar ALS [89].

In patients without the above specific impairments, assessment of  $P_{oes}$  and  $P_{ga}$ , may not be necessary as SNIP and PCF correlate well with these measures [90]. However, intra-thoracic and abdominal pressures may be used to refine the diagnosis [21, 53]. In many subjects the value of sniff- $P_{di}$  is greater than that of  $P_{lmax}$  [91] and the value of cough- $P_{ga}$  is greater than that of  $P_{Emax}$  [21].

For both sniff and cough, strong patient encouragement is required to achieve maximal performance. Multiple attempts with adequate breaks (30 s) are needed to reach a plateau of these measurements [92]. It is advisable to perform more than 3 and up to 10 attempts after a plateau is reached. Visual feedback on a computer screen is a simple and engaging tool to motivate subjects, particularly children [68].

A sniff is usually reported as the pressure difference between baseline and peak pressure. In addition, it is possible to calculate the sniff's maximal relaxation rate (MRR) – i.e., maximal decrease in pressure or  $dP/dt$ . The sniff's MRR can give information on respiratory muscle function including early fatiguing state, selective fiber recruitment, muscle function in patients with thyroid diseases and in malnourished patients [58, 93]. Because MRR is pressure-dependent, the MRR is normalized by dividing by  $dP/dt$  by peak pressure [94]. This allows to compare the MRR of sniffs of varying intensity [94].

In adults, the average within-subject, between-occasion CV is higher for sniff- $P_{di}$  (11%) [92] than for cough- $P_{ga}$  (6.9%) [21] (table 2 in main text). No such values are available for children. For sniff-MRR, only individual within-subject, between-occasion CVs have been reported and they range from 6% to 26% [95].

In a study of 64 subjects (37 males, 27 females), Man et al. [21] reported reference values for sniff- $P_{oes}$ ,  $P_{ga}$ , and  $P_{di}$ . No reference values for cough- $P_{ga}$  are yet available. The range between individuals is quite large and reported ranges in healthy subjects are given in table 2 (main text). In many disease states, pressures produced during a sniff (e.g., sniff- $P_{oes}$ ) and during a cough (i.e., cough- $P_{ga}$ ) are lower than normal both in adults [21, 53, 90] and children [38, 70, 96], as are non-invasive measures of static ( $P_{lmax}$ ,  $P_{Emax}$ ) or dynamic (SNIP, PCF) respiratory muscles strength and function. Thus, it is important to know what additional diagnostic information on respiratory muscle function can be obtained by measuring pressure signals using balloon (or other pressure-tip) catheters. For example, patients with multiple sclerosis [90] generate a significantly lower cough- $P_{ga}$  ( $109 \pm 46$  cmH<sub>2</sub>O) than controls ( $150 \pm 34$  cmH<sub>2</sub>O). In turn, cough-

$P_{ga}$  can be predicted by measuring PCF. This favours the use of the less invasive technique (PCF) than the more invasive one (cough- $P_{ga}$ ).

In patients with lung disease, including patients with COPD [95], pulmonary fibrosis [95], CF [68] and patients with systemic lupus erythematosus who develop ‘shrinking’ lung syndrome [95], sniff- $P_{oes}$  recordings help avoid underestimation of inspiratory muscle strength by use of SNIP or  $P_{Imax}$  only. In patients with heart failure, a reduced sniff- $P_{di}$  ( $103 \pm 21$  cmH<sub>2</sub>O) correlates with reduced cardiac output [97].

Sniff- $P_{oes}$  may underestimate diaphragm dysfunction such as in patients with bilateral diaphragm paralysis [98]. This is because these patients increasingly recruit rib cage and neck muscles during a sniff manoeuvre. In patients with unilateral diaphragm paresis, Verin et al. [99] observed a significant reduction in sniff- $P_{oes}$ . This reduction was positively correlated with the time elapsed from onset of symptoms to respiratory muscle testing [99].

In a large cohort of patients with mixed diagnoses (156 NMD, 94 dyspnoea of unknown origin, 45 COPD, 37 rheumatologic disease and 81 other diseases), Steier et al. [53] assessed to which extent adding  $P_{oes}$  or  $P_{ga}$  would improve diagnosis of respiratory muscle weakness. These authors reported that using a single test such as  $P_{Imax}$  or  $P_{Emax}$ , tends to overdiagnose respiratory muscle weakness. Measuring both,  $P_{Imax}$  and SNIP, reduced the false-positives by 20%, while adding sniff- $P_{oes}$  *did not* significantly improve the rate of false-positive tests. When diagnosing expiratory muscle weakness, adding cough- $P_{ga}$  to  $P_{Emax}$  decreased false-positives by 30% [53]. In accordance with the previous study, Tzani et al. [81] reported that adding cough- $P_{ga}$  (53% positive) to  $P_{Emax}$  (51% positive) and PCF (27% positive), reduced positive cases to 20%.

Man et al. [21] have assessed the value of adding cough- $P_{ga}$  measurement in a mixed group of 99 patients with respiratory muscle weakness. They found that cough- $P_{ga}$  had a much better positive predictive value (94%) than  $P_{Emax}$  (58%). In fact, 43% of patients with low  $P_{Emax}$  had normal cough- $P_{ga}$  while of 105 patients with low cough- $P_{ga}$ , only 6% had normal  $P_{Emax}$ . These results suggest that cough- $P_{ga}$  may be useful to exclude expiratory muscle weakness in patients with reduced  $P_{Emax}$ .

Voluntary manoeuvres are not always sufficient to elucidate the pathophysiological mechanisms. For example, compared to healthy controls, in patients with hemispheric stroke [100], sniff- $P_{oes}$  ( $58 \pm 37$  vs.  $109 \pm 29$  cmH<sub>2</sub>O), sniff- $P_{di}$  ( $63 \pm 41$  vs.  $121 \pm 39$  cmH<sub>2</sub>O) and voluntary cough- $P_{ga}$  ( $99 \pm 62$  cmH<sub>2</sub>O vs.  $209 \pm 62$  cmH<sub>2</sub>O) are lower than normal. In contrast,  $P_{ga}$  during a reflex cough

is not significantly different ( $179 \pm 78$  vs.  $208 \pm 77$  cmH<sub>2</sub>O) than normal. These results suggest that the voluntary initiation of muscle contraction contributing to lower values.

The value of sniff-P<sub>di</sub> and cough-P<sub>ga</sub> as prognostic tools has been marginally studied. In 98 ALS patients, Morgan et al. [60] assessed whether SNIP and sniff-P<sub>di</sub> could predict the risk of desaturation during sleep and the hazard ratio for death. Sniff-P<sub>di</sub> correlated well with SNIP ( $r=0.9$ ,  $p>0.01$ ) and SNIP values  $<40$  cmH<sub>2</sub>O were associated with desaturation during sleep (no such correlation for FVC or P<sub>I</sub>max). The hazard ratio for death in this group of patients was 9.1 (95% CI, 4 – 20.8%). These results suggest that it is unnecessary to record sniff-P<sub>di</sub> in ALS patients to assess their prognosis.

Polkey et al. [59] reported that sniff-P<sub>di</sub>, sniff-P<sub>oes</sub> and transdiaphragmatic twitch pressure elicited by magnetic stimulation of the phrenic nerves (P<sub>di,tw</sub>) could predict ventilation-free survival in a group of 78 ALS patients – i.e., for 3-yr ventilation-free survival, sniff-P<sub>di</sub> cut-off was 108.5 cmH<sub>2</sub>O with a sensitivity of 0.85 and a specificity of 0.98. In the same study, P<sub>E</sub>max and particularly P<sub>di,tw</sub> were predictors of survival [59].

Sniff-P<sub>di</sub>, sniff-P<sub>oes</sub> and P<sub>di,tw</sub> and cough-P<sub>ga</sub> are seldom used to assess response to interventions. After lung volume reduction surgery, for example, sniff-P<sub>di</sub> [64, 101], SNIP [64], P<sub>I</sub>max [64, 101] and P<sub>di,tw</sub> [102] increased significantly. In patients with COPD completing an exhaustive treadmill walk, sniff-P<sub>oes</sub> did not change from pre-exercise values [103]. Sniff-P<sub>oes</sub>-MRR, however, decreased by 42%, and recovered within 5 min of rest [103]. This transient decrease in sniff-P<sub>oes</sub>-MRR suggests development of inspiratory muscle fatigue.

**Paediatrics.** The measurement of P<sub>oes</sub> and P<sub>ga</sub> during voluntary manoeuvres such as sniff and cough is particularly useful in children (table S14). As noted, SNIP can underestimate inspiratory muscle strength in patients with upper airway obstruction (hypertrophy of the adenoids, rhinitis, polyps) and lower airway obstruction (children with CF) [68]. Accordingly, in these patients, a low SNIP value should prompt measurement of sniff-P<sub>oes</sub>.

The measurement of P<sub>oes</sub> and P<sub>ga</sub> may also suggest diaphragmatic dysfunction as reported in children with collagen type VI (ColVI) myopathies [96] and selenopathies [104].

In children as in adults, expiratory muscle strength can be measured during a maximal cough (P<sub>ga</sub>-cough) [21, 38, 70]. Visualization of the P<sub>ga</sub> signal during the cough on a computer screen is a simple and playful tool to motivate a child to perform a maximal manoeuvre [21, 38, 70].

**ICU.** In intubated patients instrumented with oesophageal and gastric balloons it is possible to



record maximal  $P_{oes}$  ( $P_{oes,max}$ ) and maximal transdiaphragmatic pressure ( $P_{di,max}$ ) during forceful inspiratory efforts.  $P_{oes,max}$  can be used to evaluate global inspiratory muscle strength while  $P_{di,max}$  can be used to evaluate diaphragmatic strength. In most patients the contribution of  $P_{ga}$  to  $P_{di}$  during a maximal inspiratory effort is minimal-to-none (see figure 4 in Laghi et al. [105]). Accordingly, in these patients, a simple  $P_{Imax}$  can give similar information afforded by  $P_{oes,max}$  and  $P_{di,max}$ .

Intubated patients cannot sniff naturally because the upper airway is bypassed by the endotracheal or tracheostomy tube. To overcome this obstacle, Goldstone et al. [73] used a flap valve in 19 alert and cooperative intubated patients. The flap valve occluded flow during inspiration thereby allowing patients to generate a "sniff-like" inspiratory waveform. In the study, 14 out of 19 patients were able to perform sniff-like manoeuvres. Unfortunately, the investigators did not report the sniff- $P_{oes}$  or sniff- $P_{di}$  values recorded in the study nor the intra or inter-observer reproducibility of sniff pressures. What role sniff manoeuvres may play in the assessment of respiratory muscle function in intubated patients remains to be determined.

## **1.4 Respiratory muscle-related mechanics of breathing**

### **1.4.1 Pressure-related measurements during inspiratory capacity (IC)**

IC is the maximal volume of air that can be inhaled to TLC after a quiet exhalation to end-expiratory lung volume (EELV). The main determinants of resting IC in patients with COPD include the magnitude of the resting EELV (inverse relation), the strength of the inspiratory muscles, and the combined elastic properties of the lung and chest wall [106-123]. Resting IC is an indirect measure of lung hyperinflation only in patients with COPD whose TLC is not decreased to less than the lower limit of normal; e.g. no coexistent inspiratory muscle weakness, lung or chest wall restriction. In patients with milder airway obstruction and in some patients with very advanced COPD, TLC and EELV may rise in tandem to a similar extent thus preserving IC [124]. In patients with COPD and moderate obesity, expiratory reserve volume and EELV are diminished to a greater extent than TLC leading to preservation or increase in IC compared with normal weight individuals with similar forced expiratory volume in 1 second ( $FEV_1$ ) [125].

IC represents the operating limits for  $V_T$  during exercise in elite athletes and patients with

respiratory disorders. In obstructive lung disorders (COPD), TLC and IC are reduced “from below” with an increase in EELV. In restrictive lung disorders (interstitial lung diseases, inspiratory muscle weakness, chest wall restriction), TLC and IC are reduced “from above” without an increase in EELV. Regardless of the underlying disorder, and in the absence of inspiratory muscle weakness, a reduced IC indicates close proximity of  $V_T$  to TLC – at the upper less compliant reaches of the respiratory systems s-shaped pressure-volume relaxation curve where the inspiratory muscles are under a significant disadvantage [126]. In these patients early mechanical constraints (and high  $V_T/IC$  ratios) are evident at relatively low exercise intensity and correlate with increased ratings of dyspnoea [115, 117-119, 127]. In patients with asthma [108, 112], pulmonary arterial hypertension (PAH) [109, 111] and in patients with chronic heart failure (CHF) [114], airway dysfunction with the resultant progressive reduction in IC during exercise (dynamic lung hyperinflation) have important mechanical and sensory consequences [119].

IC’s repeatability and reliability, its predictive, discriminative and evaluative value and its minimal clinically important difference (MCID) have been extensively described elsewhere [122]. The accuracy and construct validity of serial IC measurements during exercise to track change in EELV has been confirmed in a number of studies in COPD. One large retrospective analysis examined test re-test repeatability of IC during rest and exercise in 463 patients with moderate to severe COPD entered in multi-center, multi-national clinical trials designed to test efficacy of bronchodilators. Within-subject coefficient of variation (CV) for IC at rest, at a standardized time during exercise and at peak exercise was 9.5%, 10.8% and 11.6%, respectively. Intra-class correlation (with 95% confidence interval) for IC at rest, standardized time and peak exercise was 0.89 (0.87- 0.91), 0.88 (0.86-0.9) and 0.87 (0.85-0.89), respectively. While IC measurements have been shown to be robust in diverse international clinical research settings, data are lacking on its reliability as an evaluative instrument in clinical practice.

In patients with COPD, the ratio of IC to TLC can predict respiratory and all-cause mortality and the risk and severity of exacerbations [128-130]. There is strong evidence that lung hyperinflation and attendant reduction in IC is closely linked to the severity of dyspnoea experienced by patients with COPD during physical activity. Although exercise limitation in these patients is multi-factorial, respiratory mechanical factors are undoubtedly important. In this context, resting IC is a good predictor of peak ventilatory capacity and peak oxygen uptake in

COPD. Moreover, therapeutic reversal of lung hyperinflation, with improvement of IC, has been shown to be associated with improved dyspnea and exercise endurance [122].

Cross-sectional studies have confirmed that significant differences in IC are discernable across quartiles of severity of airway obstruction based on spirometry. Thus, IC recordings provide additional information about the individuals exercise capacity and dyspnea beyond simple spirometry [122].

In multiple clinical trials, bronchodilators of all classes and duration of action have been shown to increase IC [122]. Generally, bronchodilator-induced improvements in resting IC range from 0.2- 0.4L or 10-15% of the baseline value. Besides bronchodilator therapy, any intervention that reduces inspiratory neural drive and thus breathing frequency such as hyperoxia, helium-oxygen, or exercise training (by delaying metabolic acidosis) has the potential to reduce the rate of increase of EELV during exercise (by prolonging expiratory time), thereby improving dyspnea by delaying the onset of mechanical limitation [122]. Changes in IC during exercise have also mirrored improvement in dynamic respiratory mechanics following lung volume reduction procedures in patients with COPD and following bi-ventricular pacing in patients with CHF [122].

IC measurement is simple, safe and easy to perform. IC manoeuvres are carried out at the end of a steady-state resting baseline period (approximately 3 minutes) until at least 2 reproducible efforts are achieved (i.e.,  $\pm 100$  mL or within approximately 10% of the largest acceptable value). IC measurements at rest should not be performed closer than 1 minute apart, and measurements should not be repeated until breathing has returned to the pre-manoeuve pattern [122].

As is the case with other spirometric and plethysmographic indices, no minimal clinically important difference value has been clearly established for indirect measurements of lung hyperinflation such as IC. From experience to date, a post-intervention change in IC of  $\sim 0.2$ L at rest or at a standardized time during exercise (or  $\sim 15\%$  predicted) could be considered clinically meaningful [122]. More specifically, such changes have been consistently associated with increased exercise endurance time by at least 60 seconds or in the order of 20-30% in patients with moderate to severe COPD. The IC manoeuvre is reliable in evaluating dynamic hyperinflation during cardiopulmonary exercise testing (CPET) in patients with COPD, asthma, PAH and CHF. This is because TLC does not change during exhaustive cycle exercise neither in healthy subjects [131] nor in patients [113, 116, 132, 133].

A dynamic decrease in IC during exercise can be caused by true dynamic hyperinflation or by impaired inspiratory muscle performance (weakness/fatigue). Previous studies have assessed the reliability of IC manoeuvres by comparing inspiratory  $P_{oes}$  values during IC manoeuvres, and clearly demonstrated that IC- $P_{oes}$  values were remarkably preserved during exercise and independent of exercise intensity and ventilation in COPD [117, 118, 134], CHF [132] and PAH [116] (figure 3). The contention that these patients were able to inhale to a lung volume close or equal to TLC was bolstered by the evidence that end-exercise static lung compliance was remarkably preserved compared with pre-exercise static lung compliance. This finding suggests that in healthy subjects [135], and in patients with COPD [134], PAH [116], and CHF [132] the elastic recoil pressure of the lung does not change during exercise. All these observations suggest that exercise-induced changes in EELV can indeed be reliably monitored with IC manoeuvres. Exercise-induced inspiratory muscle fatigue, if present, does not seem to be sufficient to contribute to decreases in IC during exercise because of the stable IC- $P_{oes}$  during CPET (figure S1) and identical sniff- $P_{oes}$  values pre/post-exercise in these patients. Although IC- $P_{oes}$  and sniff- $P_{oes}$  measures during CPET can rule out a potential inspiratory muscle fatigue, their predictive, discriminative and evaluative value along with their respective MCID have not yet been described. Further studies are therefore needed in this regard.

#### **1.4.2 Indices of respiratory muscle effort**

Computation of tidal swings in  $P_{oes}$  and  $P_{di}$ , WOB, PTP and TTI can be used to assess the pressure output of the respiratory muscles [136]. In common usage, the expression WOB is often understood to be synonymous with breathing effort [137]. WOB, however, is technically defined in the mechanical and not biologic terms. Mechanical work (W) occurs when pressure (P) changes the volume (V) of matter:  $W = P \times V$ . In the case of the respiratory system, mechanical (external) WOB can be calculated by measuring the generation of intrathoracic pressure (i.e., change in  $P_{pl}$ ) due to contraction of the respiratory muscles and the displacement of gas volume [136]. In spontaneously breathing subjects, tidal changes in  $P_{pl}$  can be estimated measuring changes in  $P_{oes}$  [136].

PTP is calculated as the time integral of the area between  $P_{oes}$  and the recoil pressure of the chest wall ( $PTP_{oes}$ ) or as the time integral of the area between baseline  $P_{di}$  (resting end-expiratory  $P_{di}$ ) and  $P_{di}$  during the inspiratory effort ( $PTP_{di}$ ) [137].  $PTP_{oes}$  reflects the effort done by all of the

respiratory muscles and  $PTP_{di}$  reflects mostly the effort done by the diaphragm [138, 139].

TTI is an estimate of inspiratory effort relative to respiratory muscle strength. Generally speaking, TTI is calculated as the product of respiratory duty cycle (inspiratory time divided by the time of a total respiratory cycle or  $T_I/T_{TOT}$ ) and mean inspiratory pressure per breath divided by the maximum inspiratory pressure [137]. The effort done by all of the respiratory muscles, or  $TT_{rc}$ , is calculated as the product of mean inspiratory  $P_{oes}$  divided by  $P_{oes,max}$  and  $T_I/T_{TOT}$ :  $TT_{rc} = (P_{oes}/P_{oes,max}) \times (T_I/T_{TOT})$ . The effort done by the diaphragm, or  $TT_{di}$ , is calculated as the product of mean inspiratory  $P_{di}$  divided by  $P_{di,max}$  and  $T_I/T_{TOT}$ :  $TT_{di} = (P_{di}/P_{di,max}) \times (T_I/T_{TOT})$ .

Measurements of WOB and PTP have been used to estimate the energy dissipated or consumed by the respiratory muscles [139]. Measurements of WOB, however, underestimate respiratory oxygen consumption during isometric contractions [142]. In addition, WOB does not account well for the duration of muscular contraction and for the decreased efficacy of respiratory muscle contraction and the chest wall distortion under loaded conditions. PTP circumvents some of these limitations of WOB [140]. PTP estimates derived from measurements of  $P_{di}$  ( $PTP_{di}$ ) seem to better reflect oxygen cost of breathing than PTP estimates derived from measurements of  $P_{oes}$  ( $PTP_{oes}$ ) [141]. PTP has been used to quantify respiratory muscle effort in healthy subjects [143, 144] and patients with respiratory disorders [105, 145-147].

When computing WOB and PTP, it is recommended to include that portion of WOB and PTP necessary to expand the chest wall. This can be accomplished directly by measuring the compliance of the chest wall or indirectly by assuming that the compliance of chest wall amounts to 4% of the predicted vital capacity (VC) per cmH<sub>2</sub>O [15]. Because the pressure necessary to expand the chest wall during tidal breathing is usually small, some investigators ignore its contribution to WOB or PTP.

PTP can be separated into several components: effort made to overcome intrinsic PEEP such as in patients with COPD, effort to inflate the chest and, in the specific case of mechanically ventilated patients, the effort to trigger the ventilator [136]. An important technical challenge in the computation of PTP is the accurate identification of the beginning of inspiratory effort, particularly when intrinsic PEEP is present [2]. This because patients with intrinsic PEEP often recruit the expiratory muscles during exhalation [148]. Sudden relaxation of the expiratory muscles at the end of exhalation causes a sudden decrease in  $P_{oes}$  that can be easily confused with the sudden decrease in  $P_{oes}$  that accompanies inspiratory muscle contractions [136]. To correct

for expiratory muscle contribution to intrinsic PEEP and to better define the beginning of inhalation, it is useful to record  $P_{ga}$  [148].

During resting breathing, healthy subjects generate a  $PTP_{oes}$  of around  $100 \text{ cmH}_2\text{O} \cdot \text{sec} \cdot \text{min}^{-1}$  [137]. The  $PTP_{oes}$  of patients with COPD at rest is twice that in healthy subjects [149]. The average  $PTP_{oes}$  of patients in acute respiratory failure can be 4 to 6 times higher than in healthy subjects [137, 150]. During spontaneous breathing trials, increases in respiratory effort reflected by increases in  $PTP_{oes}$  are predictive of weaning failure [150].

A simplified strategy to monitor global inspiratory effort consists in measuring  $P_{oes,tid}$  (figure 3) [151].  $P_{oes,tid}$  can be expressed as an absolute value or relative to  $P_{oes,max}$  ( $P_{oes,tid}/P_{oes,max}$ ).  $P_{oes,tid}$  is less precise than measurements of  $PTP_{di}$  yet, it has been successfully applied as bedside monitoring tool in sleep studies [152], and during weaning trials [153].  $P_{oes,tid}$  (in analogy with the  $PTP_{oes}$ ) showed larger changes over the course of a failed weaning trial than breathing pattern parameters (rapid shallow breathing index) [150, 153].  $P_{oes,tid}$  can also serve as a useful index of global respiratory muscle effort during exercise in patients with chronic respiratory disease [154]. During exercise, increases in  $P_{oes,tid}$  swings relative to stable tidal volume responses are related to the perception of dyspnoea [117, 154].

$TT_{rc}$  and  $TT_{di}$  have been used to identify potentially fatiguing contractions of the respiratory muscles [155]. Healthy subjects cannot sustain indefinitely respiratory loads that require the generation of a  $TT_{rc}$  greater than 0.30 [156] or a  $TT_{di}$  greater than 0.15, 0.18 [157] (In healthy subjects, a sustained increase in  $TT_{di}$  above 0.15 leads to diaphragmatic fatigue even before task failure [158].) Reliable calculation of  $TT_{rc}$  and  $TT_{di}$  is critically dependent on an accurate measurement of  $P_{oes,max}$  and  $P_{di,max}$ , respectively [157]. Unfortunately, in critically ill patients, ‘maximal’ inspiratory voluntary efforts often underestimate maximum respiratory muscle strength [105]. This is because critically ill patients are unable to activate completely the diaphragm during ‘maximal’ voluntary inspiratory maneuvers [105]. Such underestimation of  $P_{di,max}$  necessarily produces an overestimation of  $TT_{di}$  – one of the reasons why patients who fail a trial of weaning from mechanical ventilation not develop contractile fatigue of the diaphragm despite generating  $TT_{di}$  above 0.15 [105].

Variable resistive and elastic unloading of the respiratory muscles by either continuous positive airway pressure or inspiratory pressure support can reduce inspiratory effort. Reduced effort has been associated with reduced dyspnea and improvements in exercise capacity in patients with

COPD [127, 145, 159]. Reductions in the resistive WOB and dynamic hyperinflation by helium-hyperoxia also reduce inspiratory effort and dyspnea [127, 160]. Finally, breathing exercises that promote slow and deep breathing can reduce elastic resistance during breathing and thereby reduce inspiratory effort [161-163]. In addition, changes in inspiratory duty cycle (decreased  $T_i/T_{tot}$ ) induced by these breathing techniques can further reduce PTP by reducing inspiratory time per minute [164].

### **1.4.3 Flow-Volume Loop to Evaluate Expiratory Flow Limitation**

The flow-volume loop technique permits the evaluation of expiratory flow limitation (EFL) at rest [165] and during exercise [166]. Evaluation of the expiratory limb of the maximum flow-volume loop can also be used to assess expiratory muscle weakness. Severe expiratory muscle weakness is suggested by a sudden decrease in maximum expiratory flow toward RV [89].

EFL can be assessed by positioning the resting and the exercise tidal flow-volume loops within the pre- or the post-exercise maximum flow-volume loop taking care that the tidal flow-volume loop starts from EELV [166]. EFL is present when the expiratory limb of the tidal flow-volume loop encroaches or exceeds the expiratory limb of the resting maximum flow-volume loop [165]. The severity of EFL can be quantified calculating the percentage of  $V_T$  that encroaches or exceeds the expiratory limb of the maximum flow-volume loop

Performing forced expiratory manoeuvres to generate the maximum flow-volume loop is safe in the general population [167, 168].

Although the flow-volume loop technique is widely used, there are many methodological limitations that can impact the validity of the technique. These include thoracic gas compression artifacts [169, 170], presence of exercise-induced bronchodilation [169] or exercise-induced bronchoconstriction [171], differences in the time and volume history preceding maximal and tidal exhalations [172-174], time-constant inequalities [175, 176], and poor patient cooperation and effort. Accurate alignment of the tidal and maximal expiratory flow-volume loops during exercise also depends on the accuracy of IC manoeuvres. Studies in obstructive pulmonary diseases show that EFL is over-estimated using the flow-volume loop method compared to the negative expiratory pressure (NEP) technique (see below) [177-182].

#### **1.4.4 Negative Expiratory Pressure (NEP)**

The NEP technique allows the evaluation of EFL at rest and during exercise [183]. This technique can also assist in the evaluation of patients with suspected increased upper airway collapsibility [184, 185]. During normal exhalation, a negative pressure is quickly applied at the airway. If EFL is present, the resulting expiratory flow is not greater than the expiratory flow of the preceding tidal exhalation [181, 183, 186, 187]. EFL can be quantified using the 3-point score or the 5-point score system [188]. EFL can also be quantified by examining the percentage overlap between the NEP breath and the preceding control breath(s) [189]. In patients with COPD, EFL is poorly reproducible when it is assessed using the percentage overlap NEP method [179, 188]. In contrast, EFL is highly reproducible in patients with and without COPD when EFL is assessed using the 3-point score or 5-point score NEP method [188, 190]. NEP has been validated against direct measurement of iso-volume, flow-pressure relationships in mechanically ventilated patients [189]. The NEP technique is a safe, non-invasive procedure that causes no discomfort [183].

The use NEP has been primarily limited to the research setting. The presence of EFL identified using the NEP technique has been associated with dyspnoea on exertion in patients with COPD [183], exercise limitation [180], and as an indicator of worsening COPD [191]. NEP has also been used in healthy infants [1932], in children with asthma and CF [193], in patients with CHF [4], obstructive sleep apnoea syndrome (OSAS), in obese patients without OSAS [195], in obese subjects during exercise [197], in spinal cord injured patients [196], in patients with restrictive disorders [174, 198], in elite athletes [174, 198] and in ICU patients [189].

NEP might help determine whether maximal expiratory flow has been achieved, i.e., decreased maximal expiratory flows may be suggestive of expiratory muscle weakness or lack of coordination of expiratory muscles but there is no data of NEP being used this way.

#### **1.4.5 Inspiratory Flow Reserve (on the flow volume loop)**

Maximal inspiratory flow-volume curves are universally recorded during standard pulmonary function testing, a standard procedure with minimal safety concerns [19, 199].

Maximal inspiratory flow-volume curves can be reduced as a result of extrathoracic upper airway obstruction and, in the effort-dependent regions of the curve, as a result of respiratory muscle weakness, poor effort, and poor performance of the manoeuvre [19, 200]. Only a small



percentage of tests indicate abnormalities including inspiratory muscle weakness [201]. The latter observation does not detract from the fact that visual examination of the maximal inspiratory flow-volume loop may still suggest weakness [19, 202]. Maximal inspiratory flow-volume loops have greater variability than the VC manoeuvres and reference values for inspiratory flow may present problems with interpretation [19].

Inspiratory flow oscillations (saw-tooth) may suggest upper airway and surrounding muscular abnormalities [19, 203] including neuromuscular diseases, Parkinson's disease, laryngeal dyskinesia, pedunculated tumours of the upper airway, tracheobronchomalacia and upper airway burns [201]. Inspiratory flow oscillations have also been reported in snorers without OSAS, in patients with OSAS and in about 10% of healthy individuals [201].

Unfortunately, inspiratory flow-volume curves are not sufficiently sensitive to diagnose upper airway obstruction. This because lesions must narrow the tracheal lumen to less than 8 mm (i.e., a reduction of the tracheal by at least 80 percent) before abnormalities in the flow-volume curves can be detected [201]. By examining PEF, the slope of ascending limb of the maximal expiratory curve, the drop in forced expiratory flow near residual volume, and the inspiratory flow at 50% VC, better predictability may be achieved [202].

As already noted, the quality of maximal inspiratory flow-volume curves depends on patient motivation and cooperation. Moreover, there are more specific tests of muscle weakness than maximal inspiratory flow-volume curves including recordings of VC, SNIP and  $P_{di,tw}$  [204, 205]. In clinical practice it is useful to use a battery of respiratory muscle tests ( $P_{Imax}$ ,  $P_{Emax}$ ) and pulmonary function tests (VC, FVC, and less so maximal voluntary ventilation -MVV) to assess respiratory muscles weakness [206, 207].

#### **1.4.6 Maximum Voluntary Ventilation (MVV)**

MVV ( $l \cdot \text{min}^{-1}$ ) is produced voluntarily in 12 to 15 s during standard pulmonary function testing as described in the ATS/ERS statement [200] or estimated as forced-expiratory volume in 1 s ( $FEV_1$ )  $\times$  35 or 40 [19]. *(For additional discussion of the MVV manoeuvre please see section 1.6 Respiratory muscle endurance testing).*

### **1.5 Evoked manoeuvres**

Measurements of transdiaphragmatic pressure elicited by electrical or magnetic stimulation of the phrenic nerves or  $P_{di,tw}$  can be used to evaluate diaphragmatic contractility. When the glottis is open, swings in  $P_{oes}$  are evident in the upper airway (i.e. the mouth or, if the patient is intubated, the endotracheal tube). Phrenic nerve stimulation is usually done using magnetic stimulators unless patients have pacemakers or other implanted electronic devices [208]. In these patients, electrical stimulation is preferred [209].

Several important factors need consideration since they may change the amplitude of  $P_{di,tw}$

- i. Nerve stimulation must be supramaximal to be reliable and needs special consideration in obesity (insulation) or with muscle activity (the activation threshold of motor nerve axons increases after minutes of repetitive use [210, 211]). Confirming supramaximality requires accurate measurement of the electromyographic signal, or the amplitude of  $P_{di,tw}$  as stimulation output is increased.
- ii. Prior contractile activity may lead to a ‘falsely high’  $P_{di,tw}$  through a phenomenon known as twitch potentiation [212]. For this reason, stimuli should be delivered after a minimum rest period of 10 to 20 min. If changes in diaphragmatic contractility immediately after an activity such as exercise are of interest [213], one option is to assess potentiated  $P_{di,tw}$  both before and just after the exercise. This, however, bears the risk of ‘incomplete’ potentiation if the voluntary inspiratory contractions used to elicit potentiation are less than 60% of  $P_{di,max}$  [214].

A change in lung volume affects diaphragm length and pressure output - e.g. hyperinflation leads to diaphragm shortening and a reduction in  $P_{di,tw}$  [209, 215], mainly through a reduction in the oesophageal pressure twitch ( $P_{oes,tw}$ ) [216]. Thus, to obtain reproducible measurements, the subject should be relaxed at consistent EELV. Also, interpreting changes of  $P_{di,tw}$  over time should be done with caution if a patient has received interventions which might change lung volume [217]. Typically, a change of 0.3 cmH<sub>2</sub>O/unit % VC may be considered a reasonable correction factor [218].

- iii. Several magnetic stimulation techniques for the phrenic nerves are available. These include cervical stimulation [219], anterior mediastinal stimulation [220], and uni- [221] or bilateral anterior stimulation [221]. Most specialist units prefer the latter as it more often results in supramaximal stimulation of the phrenic nerves than the other approaches.

Magnetic stimulation of the phrenic nerves may also be applied as single [144] or paired [222] stimuli of different stimulation frequencies (both lung volume and fatigue can affect the magnitude of  $P_{di,tw}$  elicited as a function of interstimulus interval [218, 222]).

- iv. Reliability: In healthy subjects, the mean between-occasion variability in  $P_{di,tw}$  is  $20 \pm 11\%$  and CV 11% [92]. The limits of agreement of the difference of  $P_{di,tw}$  recordings is  $\pm 6$  cmH<sub>2</sub>O [92].

A non-invasive estimate of  $P_{di,tw}$ , may be obtained by measuring pressure change in the upper airway or mouth ( $P_{mo,tw}$ ), reflecting  $P_{oes,tw}$  quite closely [42, 223-225]. Whilst this obviates the need to pass oesophageal and gastric balloons, most investigators have found it necessary to instruct non-intubated patients to make a small inspiratory or expiratory effort to ensure the glottis is open [224, 226]. This may be conveniently done using an electronically triggered valve that briefly closes the airway during phrenic nerve stimulation [223, 227]. In interpreting  $P_{mo,tw}$  results, it should be recalled that the overall signal of origin (i.e.,  $P_{oes,tw}$ ) is smaller (typically  $P_{oes,tw}$  is around 50% of  $P_{di,tw}$ ) and the ‘noise’ (e.g. due to cardiac contraction) is constant. Furthermore,  $P_{oes,tw}$  (and therefore  $P_{mo,tw}$ ) is more influenced by lung volume than  $P_{di,tw}$  [218].

In several disease states, muscle weakness is seen with  $P_{di,tw}$  values below 18 cmH<sub>2</sub>O, the purported cut-off value suggested to diagnose diaphragm weakness [53].

At the end of exhaustive exercise, diaphragm fatigue (defined as  $\geq 10$ -15% reduction in  $P_{di,tw}$ ), can be documented in about 70% of healthy subjects. In contrast, diaphragm fatigue has been reported in some patients (COPD [228], low back pain [229]) but not in other patients (COPD [230], CF [231], CHF [232], interstitial lung disease - ILD- [233]). Although pre-exercise respiratory muscle fatigue impairs exercise performance [234, 235], development of fatigue is not directly related to performance in healthy subjects [236] and it does not predict outcomes in the clinical setting [105].

Stimulation of the thoracic nerve roots with simultaneous measurement of  $P_{ga}$  can be used to evaluate the main expiratory muscles, i.e. the abdominal muscles. Supramaximal stimulation of the thoracic nerve roots is difficult to obtain using currently available technologies. Abdominal muscle contractility is assessed mainly in the context of development of expiratory muscle fatigue during exercise. Resting gastric twitch pressure ( $P_{ga,tw}$ ) values have a slightly higher variability (CV 9-10%) [237] than  $P_{di,tw}$  (6%) [237].  $P_{ga,tw}$  decreases by up to 20% after expiratory muscle activity such as volitional heavy breathing [143, 237] or exercise [238] in the

healthy. In patients, results are less uniform with some studies showing a  $P_{ga,tw}$  decrease after exercise (ILD [233]) while others do not (COPD [228]).

**Paediatrics.** Like in adults, the recording of  $P_{di,tw}$  in children is a straightforward and non-volitional strategy to test the strength of the diaphragm [70, 239-243]. Magnetic stimulation most easily depolarizes large nerve fibres, therefore in small humans (i.e. children and neonates) it may be difficult to ensure supramaximal stimulation (table S14).

Normal values of  $P_{di,tw}$  are available for neonates [241], infants [239] and children [244].

$P_{di,tw}$  has been measured in infants with abdominal wall defects, congenital diaphragmatic hernia [245, 246] and in children after liver transplantation [243].

Lung hyperinflation and a poor nutritional status have been associated with low  $P_{di,tw}$  values in children with CF [240]. Similarly, low  $P_{di,tw}$  values have been reported in neonates with diaphragmatic paralysis [242], in children with NMDs [70].

**ICU.** In critically ill, intubated patients, it is possible to assess diaphragmatic contractility measuring  $P_{di,tw}$  elicited by electrical or magnetic stimulation of the phrenic nerves [247]. The use of electrical stimulation in intubated patients, however, is fraught with technical limitations and, for all practical purposes, it has been abandoned [247].

Glottic closure cannot arise in a patient with an endotracheal tube. Accordingly, in ventilated patients, there is a good correlation between twitch airway pressure ( $P_{ao,tw}$ ) and  $P_{di,tw}$  [42, 248]. The limits of agreement between the two measurements, however, are wide, meaning that a particular  $P_{ao,tw}$  is a poor predictor of  $P_{di,tw}$  [42, 248]. Yet, measurements of  $P_{ao,tw}$  are reproducible and, therefore, might be used to track changes in diaphragmatic contractility in ventilated patients [42].

Measurements of  $P_{ao,tw}$  and  $P_{di,tw}$  elicited by magnetic stimulation of the phrenic nerves have given insights on diaphragmatic contractility in the critical care setting. These include the objective demonstration that intubated patients cannot maximally recruit the diaphragm during ‘maximal’ voluntary inspiratory manoeuvres, that weaning failure is not caused by diaphragmatic fatigue and that patients who require mechanical ventilation develop profound diaphragmatic weakness [105, 249-254].

Experimental evidence suggests that in critically ill patients acquired diaphragm weakness variably defined as a  $P_{ao,tw} < 11$  cmH<sub>2</sub>O [249] or  $P_{di,tw} \leq 10$  cmH<sub>2</sub>O [253] might be associated

with excess morbidity and mortality [249-254]. Duration of mechanical ventilation has been reported as a risk factor for diaphragm weakness by some [250, 251, 252] but not all investigators [254]. Similarly, sepsis and severity of underlying disease are risk factors for diaphragm weakness according to some but not other investigators [105, 249, 25, 254]. There are also contrasting results on the impact of diaphragm weakness on weaning outcome and duration of mechanical ventilation [106, 249-254]. Investigators have reported an association between diaphragm weakness and mortality in mechanically ventilated patients [249, 251, 254, 256]. Lack of standardization with twitch recordings hinders the comparison of the results of different studies. Whether diaphragmatic weakness is marker of disease severity or it is causally related to worse outcomes in critically ill patients remains to be determined [257].

## **1.6 Respiratory muscle endurance testing**

### **1.6.1 Inspiratory muscle endurance to an external load**

External loading protocols are frequently used to measure respiratory muscle endurance. The load can be incremental or constant, and is to be sustained until symptom limitation – endurance time or  $T_{lim}$  [258]. The load itself can be (1) flow resistive, in which the pressure required of the muscles is dependent on the flow rate across the resistance; (2) threshold load in which a finite pressure is required to open a valve that allows flow – i.e., the pressure at the airway opening generated by the respiratory muscles is relatively constant and independent of both volume and flow [258, 259]; or (3) hybrid between flow resistive loads and threshold loading (tapered flow resistive loading) [260]. During the latter type of loading, an initial threshold load has to be overcome. Then, the pressure is flow-dependently tapered down to accommodate length tension characteristics of the respiratory muscle. The result is an iso-flow (i.e. iso-velocity) contraction.

Muscle performance is influenced by breathing pattern (both timing components and inspiratory volumes). Accordingly, some investigators recommend controlling these parameters during testing [258, 259]. The control of breathing pattern, however, adds complexity to the procedure. This is why measurements of inspiratory muscle endurance have been regarded, until recently, to be beyond the scope of routine clinical practice [260]. Some investigators, however, argue that the need to control breathing pattern during endurance testing might be overcome by simply recording mouth pressure, flow and inspiratory volumes during the test [19]. WOB performed during the test (integrated from inspiratory volumes and mouth pressure) has been put forward as

the most important determinant of  $T_{lim}$ , regardless of the pattern of breathing [19]. With the introduction of new handheld devices that record continuously flow, volume, and pressure responses, it is now easier to monitor breathing pattern and WOB during endurance tests [260, 263]. This has opened the possibility to implement well controlled endurance tests into standard clinical evaluation of different interventions.

Generally speaking, inspiratory muscle endurance tests to external loads require development of large pressures swing [19]. Concurrently, ventilatory requirements remain unchanged or modestly increase [19]. Such conditions are similar to those of weight lifting, with relatively low velocities of muscle shortening. In contrast, hyperpnoea endurance tests (see section 1.6.2) are more like activities of running with large velocities of shortening.

One technique of inspiratory muscle endurance testing is the so-called incremental threshold loading technique first described in the late 1980s [264, 265]. This technique was designed to resemble a Bruce protocol, which is popular for incremental, whole body exercise testing. Before the threshold loading test, the subject's  $P_{Imax}$  is measured by standard techniques. Then the subject inhales against an external threshold load set at approximately 30–40% of  $P_{Imax}$ . Every 1 to 2 min, the load is increased by approximately 5–10% of  $P_{Imax}$ , until the load cannot be tolerated. The maximum inspiratory mouth pressure sustained for the last full 1-min or 2-min interval is considered the peak pressure ( $P_{peak}$ ).

The incremental threshold load test holds strong appeal as a measure of inspiratory muscle function because it is well tolerated and provides a clear outcome variable. Moreover, it is sensitive to disease states and clinical treatment [266, 267]. Unfortunately, the extent to which the results from this test represent endurance or strength is not clear. Strictly speaking, the incremental threshold load test has not been proven to be a direct measure of endurance, just as an incremental exercise test is not generally considered an endurance test.

During incremental threshold loading tests, peak external work reaches its highest value somewhere during the first stages of the test and then falls precipitously before attaining  $P_{peak}$ , while oxygen consumption and pressure development are still rising [264]. This means that efficiency and ability to generate inspiratory flow and inspiratory volume are falling during the final stages of the test. Peak external work performed during the test may be a useful measurement of the dynamic capacity of the muscles of the chest wall to perform external work. This value might be as important clinically as the measure of endurance by  $P_{peak}$ .

In contrast, during a constant load test patients are asked to breathe against a constant sub-maximal inspiratory load until Tlim. It has recently been shown that if inspiratory loads are selected that result in a Tlim of less than 7 min at baseline, post-intervention test durations can be limited to 15 min without important ceiling effects [258, 260]. Data from a recent multicentre RCT demonstrated a large effect size in Tlim (0.77) measured with this constant load protocol in response to inspiratory muscle training (figure S2) [268]. Longer baseline Tlim data have previously been shown to result in ceiling effects when the post-test was limited to 15 min [258]. This lowered effect sizes of a constant load test (small to medium effect size of 0.44) in comparison to an incremental test (medium to large effect size of 0.68) in response to inspiratory muscle training [258]. Based on these data it seems reasonable to choose an external load that limits baseline test duration to 5-10 min in order to subsequently be able to limit post-test duration to 15-20 min without important ceiling effects. Standardized breathing instructions should be provided and post intervention tests should be repeated using an identical load. Improvements in Tlim and total external work performed during the tests can be recorded as main outcomes of the test.

Typical changes in breathing parameters observed during breathing against external loads after training interventions include the following: patients are able to generate higher inspiratory flow rates against equivalent external loads resulting in shorter inspiratory time, as well as being able to increase inspiratory volume and work per breath [263]. While shortening inspiratory time could be interpreted as a breathing pattern adopted to reduce the load on the muscles it also reflects the ability of the muscle to perform faster contractions against high external resistances (i.e. improvements in muscle power). The increases in inspiratory volume and external work are also suggestive of a breathing pattern that increases load on the respiratory muscles.

### **1.6.2. Hyperpnoea endurance test**

Hyperpnoea endurance tests consist in reproducing hyperpnoea as induced by intense physical exercise, without the addition of any inspiratory or expiratory load. Of the hyperpnoea endurance tests that address endurance of in- and expiratory muscles, the easiest to perform is the MVV since this test is of brief duration where the naturally occurring hypocapnia can be tolerated while all other tests need specific equipment assuring normocapnia.

**Maximum voluntary ventilation (MVV).** During the MVV manoeuvre the breathing rate

should be between 70 and 110 breaths·min<sup>-1</sup> using a tidal volume of approximately 50% FVC [200]. Subjects are asked to breathe usually for 12 s (sometimes 10 s or 15 s), and the value of MVV is then given in l·min<sup>-1</sup>.

Improvements to MVV reported in the context of respiratory or whole-body exercise training are likely to include a large task-learning component. For example, respiratory muscle training shown to improve MVV by 14% [269] to 184% [270]. For athletes, the main determinants of MVV are gender, FEV<sub>1</sub> and PEF [271] while the amount of physical training does not contribute to MVV.

The MVV manoeuvre as a test of endurance has several limitations. From a physiological point of view a 12-second test is far too short to assess intramuscular processes associated with endurance. Mechanical aspects of chest wall and lung tissue can affect the MVV value other than respiratory muscle function (i.e., stiff chest wall or lung-restrictive components, and obstruction of airways) [205]. Further, MVV has poor specificity, is highly effort dependent, and uncomfortable for patients to perform [200]. The test depends on motivation and can be tiring for some patients [19]. Accordingly, MVV is no longer recommended in the evaluation and management of patients with respiratory muscle weakness or for inspiratory and expiratory respiratory muscle endurance testing [19, 200].

**Maximal sustainable ventilation (MSV).** Testing the maximal ventilation that can be sustained for an extended period of time or MSV, is a more meaningful measure of respiratory muscle endurance than MVV. Unfortunately, there is no standardized protocol on how to perform MSV testing. Theoretically, several MSV tests with decreasing levels of ventilation should be performed up to exhaustion to determine an intensity that could be sustained for an ‘infinite duration’, in analogy to critical power for whole-body endurance testing. For a detailed description of the methodologies used, the reader is referred to the previous ATS/ERS statement [19]. In brief, after assessment of MVV [272], subjects are asked to breathe at 70-90% MVV with visual feedback and adjustment of the intensity in the first minutes of testing such that a maximal ventilatory level can be sustained for 10-15 min [273-275].

MSV tests based on prolonged hyperpnoea require special equipment to provide normocapnic conditions and visual feedback; of note, different resistances of these systems can affect test results [269, 274-276].

Using MSV testing, investigators have reported decreased respiratory muscle endurance in



patients with CHF [277] compared to healthy subject. In addition, when conducting MSV testing using the same protocol and equipment, it is possible to document improvements in respiratory muscle endurance following hyperpnoea training in healthy subjects [278, 279], in patients with CHF [280] and in patients with COPD [276]. Finally, compared to MSV at sea-level, Forte et al [281] have reported an increase in MSV at high altitude in healthy subjects. This result is likely mediated by a decrease in air density at high altitude [281].

When compared to changes in MVV after respiratory muscle training, the size effect of changes in the MSV is larger than that of MVV [282].

**Maximal incremental hyperpnoea.** Loading the respiratory muscles by hyperpnoea of stepwise incremental intensity is gaining popularity. Usually subjects are instructed to breathe at 20% MVV for 3 min and then to increase ventilation by 10% MVV every 3 min up to the highest %MVV that can be sustained for 3 min [19]. Ventilation achieved during maximal incremental hyperpnoea testing are of similar magnitude of those recorded during traditional MSV tests [277, 280]. After hyperpnoea training, respiratory muscle endurance assessed with maximal incremental hyperpnoea improves by 52% in obese subjects (range ~19 to ~28 min) [283] and by 12% in spinal cord injury patients (range from ~15 min to ~18 min) [284]. Maximal incremental hyperpnoea testing requires special equipment yet, in recent years, commercial devices have become available and normal values have been established in a large study of 160 healthy subjects from young to old age [285].

**Maximal constant-load hyperpnoea.** Respiratory muscle endurance can be tested with constant-load hyperpnoea ranging from 40% MVV in spinal cord injured patients to 70% MVV in healthy individuals. Large inter-subject differences, even in healthy subjects, can lead to very different T<sub>lim</sub> for a given level of constant-load hyperpnoea. T<sub>lim</sub> following hyperpnoea training increases by 168-630% in healthy subjects [270, 286-288], 65-250% in patients with COPD [289, 290], 103% in CF patients [291], 256% in spinal cord injured patients [292], and 265% in obese subjects [293]. Figure S3 shows the improvement in T<sub>lim</sub> during constant-load hyperpnoea following respiratory muscle endurance training based on a meta-analysis of nine studies.

**Paediatrics.** Endurance indexes are rarely calculated on a routine basis in children despite the fact that they may be informative. Diaphragmatic and oesophageal tension-time index decline significantly as boys with Duchenne muscular dystrophy get older [34].

## **2. Respiratory muscle neurophysiology**

The respiratory muscles contract phasically throughout life to maintain ventilation. Their precise neural control is important for co-ordinated activity of ‘pump’ muscles that generate intrathoracic pressures and ‘valve’ muscles that maintain airway patency (figure 4).

During resting breathing, rhythmic inputs that arise from pacemaker cells in the medulla [294] are transmitted to respiratory motoneurons in the spinal cord. This automatic control for ventilation is sensitive to increased carbon dioxide (CO<sub>2</sub>) levels such as during exercise. Additional inputs arising from cortical networks including motor and premotor areas [295] also act on respiratory motoneurons, for example, via corticospinal pathways.

Respiratory muscle neurophysiological testing can be achieved with the use of (1) EMG to measure the output of the respiratory motoneurons, (2) electroencephalography (EEG), which tests the involvement of motor and premotor areas and (3) transcranial magnetic stimulation (TMS) which assesses the neural pathways to the respiratory muscles.

### **2.1 Electromyography (EMG)**

The validity of respiratory EMG recordings depends on the (1) ability of the EMG technique to accurately reflect the activity in the target respiratory muscle and (2) that the activity recorded accurately reflects the neural control of the respiratory muscles.

Respiratory muscle EMGs are usually contaminated with electrocardiogram (ECG). This artifact is usually eliminated with the gating technique [296, 297] and, less often, with other techniques including subtraction of the ECG template from the EMG signal [297]. Respiratory muscle EMGs, especially those recorded with surface electrodes in the ICU, are also subject to power line and electro-magnetic interference [19, 298, 299]. An additional common problem with surface EMGs is signal contamination from adjacent muscles and artefactual changes due to changes in lung volume or posture [19]. Diaphragm EMG recorded via a multi-pair oesophageal electrode is less susceptible to lung volume and posture artefacts than diaphragm EMG recorded via surface electrodes [300, 301]. Intramuscular recordings are much less susceptible, but not immune [302], to contamination from neighbouring muscles and thus are superior to surface

recordings to reflect respiratory neural drive. A major benefit of the single motor unit technique is that recordings do not need to be normalized to maximal efforts.

Respiratory EMG can be used to monitor neuromuscular function and changes in respiratory motor output after interventions such as CO<sub>2</sub> inhalation, drugs, exercise and change in respiratory load. There is linear relationship between  $P_{di,tw}$  and compound muscle action potential (CMAP) recorded from oesophageal or surface electrodes [303].

Quantification of diaphragm EMG with a multi-pair oesophageal electrode [303, 304] is a superior measure of respiratory motor output than pressure measurements, as the latter, can be affected by muscle length changes and, in the case of the  $P_{ao}$  signal, by airway resistance [107]. Given that surface and oesophageal respiratory EMG values change with electrode placement and subject dimensions, they are usually standardized to a maximal value (see table 4), a reasonable strategy if subjects can achieve maximal or near maximal voluntary muscle recruitment [e.g. 305].

For intramuscular recordings when assessing respiratory motor output using the single motor unit technique, the caveats include (1) regional differences in activity, for example between the dorsal and ventral regions of the dorsal external intercostal muscle [306] and (2) that muscle force is achieved via both rate coding and motor unit recruitment, and the balance between these two processes of increasing force can vary between respiratory muscles [307]. For evoked responses, normal values of phrenic nerve conduction time are well established with both electrical and magnetic stimulation of the phrenic nerve [19, 298, 308, 309].

Tables S10 and S11 summarise the results for studies that have evaluated peak EMG (typically standardised to a maximal value) during breathing at rest and during exercise in cardiorespiratory disorders. The amplitude of the CMAPs of the diaphragm elicited by phrenic nerve stimulation are usually reduced in most NMDs (e.g. motoneurone disease), latencies, however, are prolonged in only some NMDs (e.g., demyelination) [see 303]. Spectral analysis of respiratory EMG to detect respiratory muscle fatigue [19, 298, 310] is usually limited to the research setting.

**ICU.** In the ICU, recording of the electrical activity of the crural diaphragm (EAdi) using a dedicated nasogastric tube with EMG electrodes has greatly facilitated bedside monitoring of diaphragm activity in paediatric [311] and adult patients [312]. The ratio of tidal change in EAdi to maximum EAdi ( $E_{Adi,max}$ ) can be used to estimate the patient's effort to breathe [313]. EAdi is a promising tool to monitor diaphragm activity especially during weaning from mechanical

ventilation [314]. Of note, EAdi,max varies widely between subjects so that there is no clear reference range for EAdi. Neurally adjusted ventilatory assist (NAVA), is a novel ventilator mode that synchronizes ventilation to EAdi [315, 316].

### **2.3 Transcranial magnetic stimulation (TMS)**

Depending on the selected coil, current amplitude, duration, and direction, a focal or non-focal magnetic field will depolarize neurons or their axons. TMS can be applied with different paradigms (i.e. single-pulse, paired-pulse and the neuroplasticity-inducing repetitive TMS (rTMS)) to obtain measures that explore distinct neurobiological and neurochemical processes (table 5).

TMS does not appear to cause long-term adverse neurological, cardiovascular, hormonal, motor, sensory, or cognitive effects in healthy subjects. Delivering a single-pulse (<1 Hz) of TMS to the brain is very safe [317] (table 5, table S12).

The validity of TMS depends on the appropriate location of EMG electrodes and control of background muscle activity and noise. In the laboratory, single and paired-pulse TMS have been used to study the diaphragm's corticospinal pathways in healthy subjects. Insights into the role of the cerebral control of breathing at rest, during exercise and inspiratory loading have been obtained using single-pulse TMS [318, 319] and by repetitive pulse TMS [320, 321]. Clinically, TMS is used to document respiratory muscle involvement in various disease states such as extention of diaphragm's response to TMS on the paralyzed side in stroke patients [322], abnormalities of diaphragm's response to TMS in patients with multiple sclerosis [323] or ALS [324] (see also table S13). In patients with acute ischemic stroke, respiratory muscle function, assessed by measuring changes in  $P_{ga}$  induced by TMS, represents a simple bedside technique to assess airway clearance and evaluate aspiration risk [325].

Widespread disease-related alteration of corticomotor excitability (as documented by changes in a hand muscle first dorsal interosseous) have been documented in cardiorespiratory diseases including OSAS [328] and COPD [329]. Plasticity-related TMS measures in OSAS patients have given conflicting results concerning changes in the amplitude of motor evoked potential (MEP) of upper airway muscles (increase in genioglossus or decrease in submental muscle) in response to rTMS trains [326, 327, 337, 338] and widespread lack of response in first dorsal interosseous MEPs characteristics after the application of high-frequency rTMS [336] or

continuous theta-burst stimulation [339].

In OSAS, a reduction of cortical excitability (i.e. MEP amplitude and latency, cortical silent period (CSP) duration) recorded in first dorsal interosseous was related to the metabolic changes induced by OSAS [330, 331]. Although some TMS studies indicate an increase in cortical-motoneuronal excitability in some upper airway and respiratory muscles [326, 327, 332, 333], no difference or a wide-spread defect in the conductivity or excitability of the corticomotor system was documented in hand muscles [330, 331, 334-336] in OSAS patients during wakefulness.

During acute exacerbation of COPD, motor threshold (MT) and central motor conduction time (CMCT) recorded in first dorsal interosseous was increased compared to controls [340], with conflicting results in CSP duration [329, 340]. Some TMS parameters recorded in first dorsal interosseous correlated with variables of pulmonary function and arterial blood gases [340]. Intracortical inhibition (ICI) of first dorsal interosseous was less pronounced in the acute-exacerbation COPD group compared to controls [329].

Effects of some interventions on TMS outcomes are summarized in table S13. In awake healthy or OSAS subjects, hyperoxic CO<sub>2</sub>-induced hyperventilation was associated with heightened chest wall/diaphragm corticomotor activation, as evidenced by decreased motor threshold and increased MEP amplitude, without modulating GG or *abductor pollicis brevis* MEP responses or scalene CSP duration [341-344].

Inspiratory resistive breathing facilitates the diaphragm response to TMS while it does not increase the automatic drive to breathe [345]. In healthy subjects, non-invasive ventilation can depress diaphragm motor cortex excitability [346]; whereas in COPD patients, an acute effect of non-invasive ventilation was observed with a reduction of diaphragm MEP amplitude, with no effect on ICF or ICI, implying an effect of neuromechanical feedback at brainstem or spinal level [347]. Compared to the responses during acute-exacerbations of COPD, 3 to 4 months of O<sub>2</sub> therapy normalize motor threshold (resting and active) and ICI impairment and prolong CSP duration in first dorsal interosseous [329].

### **3. Respiratory muscle imaging**

#### **3.1 Ultrasound**

**Paediatrics.** In children, diaphragmatic movement can be assessed by either fluoroscopy or ultrasound. The latter is gaining popularity as it does not require radiation and its bedside availability [348]. Normal, impaired, missing, or even paradoxical diaphragmatic motion can be visualized in real time by ultrasound [349]. For neonates and infants, a subxiphoid transverse view is preferred as both right and left hemi-diaphragms can be seen at the same time. Moreover, with the subxiphoid transverse view it is easy to evaluate paradoxical diaphragm movement. For older children, each hemi-diaphragm is evaluated separately with either a more lateral subcostal approach or an intercostal approach. Ultrasound is also used to evaluate lobulated-shaped hemi-diaphragms [349, 350] to assess whether the finding results from focal diaphragmatic eventration, a potential diaphragmatic hernia, or a rare thoracic kidney/spleen. Most cases of diaphragmatic hernia can be diagnosed by plain radiographs. But when the herniated viscera do not contain air, ultrasound can be used to show herniated fluid-filled bowel loops or herniated liver with the ‘waist’ sign through the diaphragmatic defect.

### **3.2 Optoelectronic plethysmography (OEP)**

OEP is an established technique to measure the variations of the volume of the chest wall and its compartments during breathing [349, 350].

Contraction of the diaphragm expands the rib cage (RCa) compartment and the abdominal (AB) compartment. Rib cage muscles, including intercostals, parasternals, scalenes and the neck muscles, mostly act on the pulmonary rib cage compartment (RCp) and are both inspiratory and expiratory. The abdominal muscles act on RCa and AB and are expiratory. In disease states, when each muscle group contracts alone or the contraction of one group is predominant compared to the contraction of other groups result in asynchronies between compartments or complete ‘paradoxical’ motion. These abnormal movements can be quantified by discernible phase shifts between compartments ( $V_{RCp}$ ,  $V_{RCa}$ , and  $V_{AB}$ ) [351-355].

The accuracy of OEP has been evaluated by comparing chest wall volume with lung volume variations measured by a spirometer or integrating a flow measurement at the airway opening. These assessments have been performed in a variety of conditions including newborns at rest [355] (accuracy  $-2.0\%$ ), quiet breathing, slow VC manoeuvres [351], incremental exercise on a

cycle ergometer [357] (CV of the two signals < 4%), during cycling exercise [358] (CV  $2.4 \pm 3.9\%$ ), in patients with respiratory muscle dysfunction [359]. Intra- observer and inter-observer reliability were evaluated at rest and during exercise [360], with intraclass correlation coefficient values >0.75 and error values <10%. The possibility to track changes in EELV by OEP on a breath-by-breath basis has been evaluated during incremental exercise (compared with simultaneous measurements of IC [361], with a mean difference of  $7.0 \pm 5.8\%$  or  $35 \pm 24$  ml) and in mechanically ventilated patients at different levels of external PEEP [362].

OEP has been extensively used to evaluate total and compartmental volume variations during exercise in patients with COPD. Patients with more severe COPD experience dynamic hyperinflation during incremental exercise, but other patients, specifically those with a greater expiratory flow reserve at rest, adopt at least two significantly different patterns of change in end-expiratory volume of the chest wall [361, 363, 364]. Some patients experience a progressive and significant increase in end-expiratory volume of the chest wall (“early hyperinflators”) and other experiencing an increase in end-expiratory volume only at higher levels of exercise (“late hyperinflators”). Three distinct patterns of breathing and chest wall volume changes to cope with chronic respiratory failure have been recorded in patients with severe COPD, interstitial pulmonary fibrosis, and CF [365].

OEP has been also used in the study of patients with several NMDs. In awake patients with Duchenne muscular dystrophy, abdominal motion during resting breathing while supine is an important indicator of the degree of respiratory muscle impairment, of disease progression and an early indicator of nocturnal hypoxemia [366]. A reduced abdominal contribution to  $V_T$  during resting breathing is also associated with inefficient cough [367]. In addition, a reduced abdominal contribution to  $V_T$  is a specific and early marker of diaphragm weakness in adolescent and adult patients with Duchenne muscular dystrophy who present either no sign or only mild nocturnal oxygen desaturation [368]. Mild initial modifications of thoraco-abdominal motion have been described in Limb-girdle muscular dystrophy, Becker muscular dystrophy, facioscapulohumeral dystrophy [369] and in ALS [370]. A negative or reduced contribution of  $V_{RCp}$  to  $V_T$  indicative of inspiratory ribcage muscle weakness, is a distinctive feature of spinal muscle atrophy type 1 and type 2 since infancy [371].

#### **4. Respiratory muscle structure, perfusion and metabolism**

## 4.2 Oxygen cost of breathing

Oxygen cost of breathing ( $\text{VO}_{2\text{RM}}$ ) is an index of the energy required for ventilation. During rest, respiratory muscles use 1-2% of the total body oxygen uptake ( $\text{VO}_2$ ) resulting in an approximate  $\text{VO}_{2\text{RM}}$  of around  $2.5 \text{ ml} \cdot \text{min}^{-1}$ . During exercise, ventilation and WOB increase in proportion to the metabolic demands [372].  $\text{VO}_{2\text{RM}}$  during maximal exercise represents  $\cong 10\%$  of whole-body maximal oxygen uptake [373-375] or even  $>15\%$  in endurance-trained men [373].  $\text{VO}_{2\text{RM}}$  in humans is mostly measured using indirect methods by measuring ventilation and  $\text{VO}_2$  at rest followed by an increase in ventilation (voluntarily, by  $\text{CO}_2$  breathing or by the addition of dead space) [376]. By extrapolating the changes observed in  $\text{VO}_2$  and ventilation,  $\text{VO}_{2\text{RM}}$  is estimated [377]. However, different approaches were used to estimate  $\text{VO}_{2\text{RM}}$  in the past with considerable variability [378]. As ventilation rises, WOB also increases. Using a wide range of ventilation values, the CV of the method ranges to estimate  $\text{VO}_{2\text{RM}}$  from 4.3 to 5.7% [379].



## References

1. Zin WA, Milic-Emili J. Esophageal pressure measurement. *In: Tobin MJ, ed. Principles and Practice of Intensive Care Monitoring.* McGraw-Hill New York 1998; pp. 545-552.
2. Marazzini L, Cavestri R, Gori D, Gatti L, Longhini E. Difference between mouth and esophageal occlusion pressure during CO<sub>2</sub> rebreathing in chronic obstructive pulmonary disease. *The American review of respiratory disease* 1978; 118(6): 1027-1033.
3. Whitelaw WA, Derenne JP. Airway occlusion pressure. *J Appl Physiol* 1993; 74(4): 1475-1483.
4. Tobin M, Gardner W. Monitoring of the control of breathing. *In: Tobin M, ed. Principles and Practice of Intensive Care Monitoring.* McGraw-Hill, 1998; pp. 415-646.
5. Chlif M, Keochkerian D, Temfemo A, Choquet D, Ahmaidi S. Inspiratory muscle performance in endurance-trained elderly males during incremental exercise. *Respiratory physiology & neurobiology* 2016; 228: 61-68.
6. Keochkerian D, Chlif M, Delanaud S, Gauthier R, Maingourd Y, Ahmaidi S. Timing and driving components of the breathing strategy in children with cystic fibrosis during exercise. *Pediatr Pulmonol* 2005; 40(5): 449-456.
7. Marin JM, Montes de Oca M, Rassulo J, Celli BR. Ventilatory drive at rest and perception of exertional dyspnea in severe COPD. *Chest* 1999; 115(5): 1293-1300.
8. Tasoulis A, Dimopoulos S, Repasos E, Manetos C, Tzanis G, Sousonis V, Papazachou O, Terrovitis J, Nanas S. Respiratory drive and breathing pattern abnormalities are related to exercise intolerance in chronic heart failure patients. *Respiratory physiology & neurobiology* 2014; 192: 90-94.

9. Scano G, Gigliotti F, Duranti R, Gorini M, Fanelli A, Marconi G. Control of breathing in patients with neuromuscular diseases. *Monaldi Arch Chest Dis* 1993; 48(1): 87-91.
10. Hoff FC, Tucci MR, Amato MB, Santos LJ, Victorino JA. Cycling-off modes during pressure support ventilation: effects on breathing pattern, patient effort, and comfort. *J Crit Care* 2014; 29(3): 380-385.
11. Perrigault PF, Pouzeratte YH, Jaber S, Capdevila XJ, Hayot M, Boccard G, Ramonatxo M, Colson P. Changes in occlusion pressure (P0.1) and breathing pattern during pressure support ventilation. *Thorax* 1999; 54(2): 119-123.
12. Sassoon CS, Mahutte CK. Airway occlusion pressure and breathing pattern as predictors of weaning outcome. *American Review of Respiratory Disease* 1993; 148(4 Pt 1): 860-866.
13. Vargas F, Boyer A, Bui HN, Salmi LR, Guenard H, Gruson D, Hilbert G. Respiratory failure in chronic obstructive pulmonary disease after extubation: value of expiratory flow limitation and airway occlusion pressure after 0.1 second (P0.1). *J Crit Care* 2008; 23(4): 577-584.
14. Mauri T, Yoshida T, Bellani G, Goligher EC, Carteaux G, Rittayamai N, Mojoli F, Chiumello D, Piquilloud L, Grasso S, Jubran A, Laghi F, Magder S, Pesenti A, Loring S, Gattinoni L, Talmor D, Blanch L, Amato M, Chen L, Brochard L, Mancebo J. Esophageal and transpulmonary pressure in the clinical setting: meaning, usefulness and perspectives. *Intensive Care Med* 2016; 42(9): 1360-1373.
15. Loring SH, O'Donnell CR, Behazin N, Malhotra A, Sarge T, Ritz R, Novack V, Talmor D. Esophageal pressures in acute lung injury: do they represent artifact or useful information about transpulmonary pressure, chest wall mechanics, and lung stress? *Journal of applied physiology* 2010; 108(3): 515-522.

16. Yoshida T, Amato MBP, Grieco DL, Chen L, Lima CAS, Roldan R, Morais CCA, Gomes S, Costa ELV, Cardoso PFG, Charbonney E, Richard JM, Brochard L, Kavanagh BP. Esophageal Manometry and Regional Transpulmonary Pressure in Lung Injury. *Am J Respir Crit Care Med* 2018; 197(8): 1018-1026.
17. Macklem PT, Gross D, Grassino GA, Roussos C. Partitioning of inspiratory pressure swings between diaphragm and intercostal/accessory muscles. *Journal of applied physiology: respiratory, environmental and exercise physiology* 1978; 44(2): 200-208.
18. Tobin MJ, Laghi F. Monitoring respiratory muscle function. *In: Tobin MJ, ed. Principles and Practice of Intensive Care Monitoring.* McGraw-Hill New York, 1998; pp. 497-545.
19. American Thoracic Society ERS. ATS/ERS Statement on respiratory muscle testing. *Am J Respir Crit Care Med* 2002; 166(4): 518-624.
20. Fiz JA, Montserrat JM, Picado C, Plaza V, Agustividal A. How Many Maneuvers Should Be Done to Measure Maximal Inspiratory Mouth Pressure in Patients with Chronic Air-Flow Obstruction. *Thorax* 1989; 44(5): 419-421.
21. Man WDC, Kyroussis D, Fleming TA, Chetta A, Harraf F, Mustfa N, Rafferty GF, Polkey MI, Moxham J. Cough gastric pressure and maximum expiratory mouth pressure in humans. *American journal of respiratory and critical care medicine* 2003; 168(6): 714-717.
22. Rodrigues A, Da Silva ML, Berton DC, Cipriano G, Jr., Pitta F, O'Donnell DE, Neder JA. Maximal Inspiratory Pressure: Does the Choice of Reference Values Actually Matter? *Chest* 2017; 152(1): 32-39.
23. Gosselink R, De Vos J, van den Heuvel SP, Segers J, Decramer M, Kwakkel G. Impact of inspiratory muscle training in patients with COPD: what is the evidence? *Eur Respir J* 2011; 37(2): 416-425.

24. Boussana A, Galy O, Hue O, Matecki S, Varray A, Ramonatxo M, Le Gallais D. The effects of prior cycling and a successive run on respiratory muscle performance in triathletes. *Int J Sports Med* 2003; 24(1): 63-70.
25. Coast JR, Clifford PS, Henrich TW, Stray-Gundersen J, Johnson RL, Jr. Maximal inspiratory pressure following maximal exercise in trained and untrained subjects. *Med Sci Sports Exerc* 1990; 22(6): 811-815.
26. Ross E, Middleton N, Shave R, George K, McConnell A. Changes in respiratory muscle and lung function following marathon running in man. *J Sports Sci* 2008; 26(12): 1295-1301.
27. Dohna-Schwake C, Ragette R, Teschler H, Voit T, Mellies U. Predictors of severe chest infections in pediatric neuromuscular disorders. *Neuromuscul Disord* 2006; 16: 325-328.
28. Gaultier C, Zinman R. Maximal static pressures in healthy children. *Respir Physiol Neurobiol* 1983; 51: 45-61.
29. Choudhuri D, Aithal M, Kulkarni VA. Maximal expiratory pressure in residential and non-residential school children. *Indian J Pediatr* 2002; 69: 229-232.
30. Cox DW, Verheggen MM, Stick SM, Hall GL. Characterization of maximal respiratory pressures in healthy children. *Respiration; international review of thoracic diseases* 2012; 84(6): 485-491.
31. Tomalak W, Pogorzelski A, Prusak J. Normal values for maximal static inspiratory and expiratory pressures in healthy children. *Pediatric pulmonology* 2002; 34: 42-46.
32. Wilson SH, Cooke NT, Edwards RHT, Spiro SG. Predicted Normal Values for Maximal Respiratory Pressures in Caucasian Adults and Children. *Thorax* 1984; 39(7): 535-538.
33. Cook CD, Mead J, Orzalesi MM. Static Volume-Pressure Characteristics of Respiratory System during Maximal Efforts. *J Appl Physiol* 1964; 19(5): 1016-1021.

34. Khirani S, Ramirez A, Aubertin G, Boulé M, Chemouny C, Forin V, Fauroux B. Respiratory muscle decline in Duchenne muscular dystrophy. *Pediatr Pulmonol* 2014; 49(5): 473-481.
35. Shardonofsky F, Perez-Chada D, Milic-Emili J. Airway pressures during crying: an index of respiratory muscle strength in infants with neuromuscular disease. *Pediatr Pulmonol* 1991; 10: 172-177.
36. Shardonofsky F, Perez-Chada D, Carmuega E, Milic-Emili J. Airway pressure during crying in healthy infants. *Pediatr Pulmonol* 1989; 6: 14-18.
37. Chetta A, Harris ML, Lyall RA, Rafferty GF, Polkey MI, Olivieri D, Moxham J. Whistle mouth pressure as test of expiratory muscle strength. *Eur Respir J* 2001; 17: 688-695.
38. Aloui S, Khirani S, Ramirez A, Colella M, Louis B, Amaddeo A, Fauroux B. Whistle and cough pressures in children with neuromuscular disorders. *Respir Med* 2016; 113: 28-36.
39. Bendixen HH, Bunker JP. Measurement of inspiratory force in anesthetized dogs. *Anesthesiology* 1962; 23: 315-323.
40. Sahn SA, Lakshminarayan S. Bedside criteria for discontinuation of mechanical ventilation. *Chest* 1973; 63(6): 1002-1005.
41. Yang KL, Tobin MJ. A prospective study of indexes predicting the outcome of trials of weaning from mechanical ventilation. *N Engl J Med* 1991; 324(21): 1445-1450.
42. Cattapan SE, Laghi F, Tobin MJ. Can diaphragmatic contractility be assessed by airway twitch pressure in mechanically ventilated patients? *Thorax* 2003; 58(1): 58-62.
43. Fiastro JF, Habib MP, Shon BY, Campbell SC. Comparison of standard weaning parameters and the mechanical work of breathing in mechanically ventilated patients. *Chest* 1988; 94(2): 232-238.

44. Zakynthinos S, Routsis C, Vassilakopoulos T, Kaltsas P, Zakynthinos E, Kazi D, Roussos C. Differential cardiovascular responses during weaning failure: effects on tissue oxygenation and lactate. *Intensive Care Med* 2005; 31(12): 1634-1642.
45. Caruso P, Albuquerque AL, Santana PV, Cardenas LZ, Ferreira JG, Prina E, Trevizan PF, Pereira MC, Iamonti V, Pletsch R, Macchione MC, Carvalho CR. Diagnostic methods to assess inspiratory and expiratory muscle strength. *J Bras Pneumol* 2015; 41(2): 110-123.
46. Stell IM, Polkey MI, Rees PJ, Green M, Moxham J. Inspiratory muscle strength in acute asthma. *Chest* 2001; 120(3): 757-764.
47. Uldry C, Janssens JP, de Muralt B, Fitting JW. Sniff nasal inspiratory pressure in patients with chronic obstructive pulmonary disease. *Eur Respir J* 1997; 10(6): 1292-1296.
48. Fitting JW. Sniff nasal inspiratory pressure: simple or too simple? *Eur Respir J* 2006; 27(5): 881-883.
49. Lofaso F, Nicot F, Lejaille M, Falaize L, Louis A, Clement A, Raphael JC, Orlikowski D, Fauroux B. Sniff nasal inspiratory pressure: what is the optimal number of sniffs? *Eur Respir J* 2006; 27(5): 980-982.
50. Terzi N, Corne F, Mouadil A, Lofaso F, Normand H. Mouth and nasal inspiratory pressure: learning effect and reproducibility in healthy adults. *Respiration* 2010; 80(5): 379-386.
51. Maillard JO, Burdet L, van Melle G, Fitting JW. Reproducibility of twitch mouth pressure, sniff nasal inspiratory pressure, and maximal inspiratory pressure. *Eur Respir J* 1998; 11(4): 901-905.

52. Nikolettou D, Rafferty G, Man WD, Mustfa N, Donaldson N, Grant RL, Johnson L, Moxham J. Sniff nasal inspiratory pressure in patients with moderate-to-severe chronic obstructive pulmonary disease: learning effect and short-term between-session repeatability. *Respiration* 2014; 88(5): 365-370.
53. Steier J, Kaul S, Seymour J, Jolley C, Rafferty G, Man W, Luo YM, Roughton M, Polkey MI, Moxham J. The value of multiple tests of respiratory muscle strength. *Thorax* 2007; 62(11): 975-980.
54. Araujo PR, Resqueti VR, Nascimento Junior J, Carvalho Lde A, Cavalcanti AG, Silva VC, Silva E, Moreno MA, Andrade Ade F, Fregonezi GA. Reference values for sniff nasal inspiratory pressure in healthy subjects in Brazil: a multicenter study. *J Bras Pneumol* 2012; 38(6): 700-707.
55. Kamide N, Ogino M, Yamashina N, Fukuda M. Sniff nasal inspiratory pressure in healthy Japanese subjects: mean values and lower limits of normal. *Respiration; international review of thoracic diseases* 2009; 77(1): 58-62.
56. Kabitz HJ, Waltersbacher S, Walker D, Windisch W. Inspiratory muscle strength in chronic obstructive pulmonary disease depending on disease severity. *Clin Sci (Lond)* 2007; 113(5): 243-249.
57. Moore AJ, Soler RS, Cetti EJ, Amanda Sathyapala S, Hopkinson NS, Roughton M, Moxham J, Polkey MI. Sniff nasal inspiratory pressure versus IC/TLC ratio as predictors of mortality in COPD. *Respir Med* 2010; 104(9): 1319-1325.
58. Garcia-Rio F, Mediano O, Pino JM, Lores V, Fernandez I, Alvarez-Sala JL, Villamor J. Noninvasive measurement of the maximum relaxation rate of inspiratory muscles in patients

with neuromuscular disorders. *Respiration; international review of thoracic diseases* 2006: 73(4): 474-480.

59. Polkey MI, Lyall RA, Yang K, Johnson E, Leigh PN, Moxham J. Respiratory Muscle Strength as a Predictive Biomarker for Survival in Amyotrophic Lateral Sclerosis. *Am J Respir Crit Care Med* 2017; 195(1): 86-95.

60. Morgan RK, McNally S, Alexander M, Conroy R, Hardiman O, Costello RW. Use of Sniff nasal-inspiratory force to predict survival in amyotrophic lateral sclerosis. *Am J Respir Crit Care Med* 2005; 171(3): 269-274.

61. Miller JM, Moxham J, Green M. The maximal sniff in the assessment of diaphragm function in man. *Clin Sci (Lond)* 1985; 69(1): 91-96.

62. Heritier F, Rahm F, Pasche P, Fitting JW. Sniff nasal inspiratory pressure. A noninvasive assessment of inspiratory muscle strength. *Am J Respir Crit Care Med* 1994; 150(6 Pt 1): 1678-1683.

63. Nikolettou D, Man WD, Mustfa N, Moore J, Rafferty G, Grant RL, Johnson L, Moxham J. Evaluation of the effectiveness of a home-based inspiratory muscle training programme in patients with chronic obstructive pulmonary disease using multiple inspiratory muscle tests. *Disabil Rehabil* 2016; 38(3): 250-259.

64. Teschler H, Stamatis G, el-Raouf Farhat AA, Meyer FJ, Costabel U, Konietzko N. Effect of surgical lung volume reduction on respiratory muscle function in pulmonary emphysema. *Eur Respir J* 1996; 9(9): 1779-1784.

65. Huang CH, Yang GG, Chen TW. Sniff nasal inspiratory pressure does not decrease in elderly subjects. *J Phys Ther Sci* 2014; 26(9): 1509-1513.



66. Uldry C, Fitting JW. Maximal values of sniff nasal inspiratory pressure in healthy subjects. *Thorax* 1995; 50(4): 371-375.
67. Stefanutti D, Fitting JW. Sniff nasal inspiratory pressure. Reference values in Caucasian children. *Am J Respir Crit Care Med* 1999; 159(1): 107-111.
68. Fauroux B, Aubertin G, Cohen E, Clément A, Lofaso F. Sniff nasal inspiratory pressure in children with muscular, chest wall or lung disease. *Eur Respir J* 2009; 33: 113-117.
69. Khirani S, Colella M, Caldarelli V, Aubertin G, Boulé M, Forin V, Ramirez A, Fauroux B. Longitudinal course of lung function and respiratory muscle strength in spinal muscular atrophy type 2 and 3. *Eur J Paediatr Neurol* 2013; 17(6): 552-560.
70. Nicot F, Hart N, Forin V, Boule M, Clement A, Polkey MI, Lofaso F, Fauroux B. Respiratory muscle testing: a valuable tool for children with neuromuscular disorders. *Am J Respir Crit Care Med* 2006; 174(1): 67-74.
71. Stefanutti D, Benoist MR, Scheinmann P, Chaussain M, Fitting JW. Usefulness of sniff nasal pressure in patients with neuromuscular or skeletal disorders. *Am J Respir Crit Care Med* 2000; 162: 1507-1511.
72. Nève V, Edmé JL, Matran R. Earlier decline in sniff nasal inspiratory pressure than peak expiratory flow in children with Duchenne muscular dystrophy. *Eur Respir J* 2014; 44(5): 1361-1363.
73. Goldstone JC, Green M, Moxham J. Maximum relaxation rate of the diaphragm during weaning from mechanical ventilation. *Thorax* 1994; 49(1): 54-60.
74. Leiner GC, Abramowitz S, Small MJ, Stenby VB. Cough peak flow rate. *Am J Med Sci* 1966; 251(2): 211-214.

75. King M, Brock G, Lundell C. Clearance of Mucus by Simulated Cough. *J Appl Physiol* 1985; 58(6): 1776-1782.
76. McCool FD. Global physiology and pathophysiology of cough: ACCP evidence-based clinical practice guidelines. *Chest* 2006; 129(1 Suppl): 48S-53S.
77. Bach JR. Mechanical insufflation-exsufflation. Comparison of peak expiratory flows with manually assisted and unassisted coughing techniques. *Chest* 1993; 104(5): 1553-1562.
78. Sancho J, Servera E, Diaz J, Marin J. Comparison of peak cough flows measured by pneumotachograph and a portable peak flow meter. *Am J Phys Med Rehab* 2004; 83(8): 608-612.
79. Suarez AA, Pessolano FA, Monteiro SG, Ferreyra G, Capria ME, Mesa L, Dubrovsky A, De Vito EL. Peak flow and peak cough flow in the evaluation of expiratory muscle weakness and bulbar impairment in patients with neuromuscular disease. *Am J Phys Med Rehab* 2002; 81(7): 506-511.
80. Bach JR, Ishikawa Y, Kim H. Prevention of pulmonary morbidity for patients with Duchenne muscular dystrophy. *Chest* 1997; 112(4): 1024-1028.
81. Tzani P, Chiesa S, Aiello M, Scarascia A, Catellani C, Elia D, Marangio E, Chetta A. The value of cough peak flow in the assessment of cough efficacy in neuromuscular patients. A cross sectional study. *Eur J Phys Rehab Med* 2014; 50(4): 427-432.
82. Bianchi C, Baiardi P. Cough peak flows: standard values for children and adolescents. *Am J Phys Med Rehabil* 2008; 87: 461-467.
83. Su WL, Chen YH, Chen CW, Yang SH, Su CL, Perng WC, Wu CP, Chen JH. Involuntary cough strength and extubation outcomes for patients in an ICU. *Chest* 2010; 137(4): 777-782.

84. Beuret P, Roux C, Auclair A, Nourdine K, Kaaki M, Carton MJ. Interest of an objective evaluation of cough during weaning from mechanical ventilation. *Intensive Care Med* 2009; 35(6): 1090-1093.
85. Smina M, Salam A, Khamiees M, Gada P, Amoateng-Adjepong Y, Manthous CA. Cough peak flows and extubation outcomes. *Chest* 2003; 124(1): 262-268.
86. Duan J, Han X, Huang S, Bai L. Noninvasive ventilation for avoidance of reintubation in patients with various cough strength. *Crit Care* 2016; 20(1): 316.
87. Kutchak FM, Debesaitys AM, Rieder Mde M, Meneguzzi C, Skueresky AS, Forgiarini Junior LA, Bianchin MM. Reflex cough PEF as a predictor of successful extubation in neurological patients. *J Bras Pneumol* 2015; 41(4): 358-364.
88. Laghi F, Maddipati V, Schnell T, Langbein WE, Tobin MJ. Determinants of cough effectiveness in patients with respiratory muscle weakness. *Respir Physiol Neurobiol* 2017; 240: 17-25.
89. Kreitzer SM, Saunders NA, Tyler HR, Ingram RH, Jr. Respiratory muscle function in amyotrophic lateral sclerosis. *The American review of respiratory disease* 1978; 117(3): 437-447.
90. Aiello M, Rampello A, Granella F, Maestrelli M, Tzani P, Immovilli P, Franceschini M, Olivieri D, Chetta A. Cough efficacy is related to the disability status in patients with multiple sclerosis. *Respiration; international review of thoracic diseases* 2008; 76(3): 311-316.
91. Prigent H, Orlikowski D, Fermanian C, Lejaille M, Falaize L, Louis A, Fauroux B, Lofaso F. Sniff and Muller manoeuvres to measure diaphragmatic muscle strength. *Respir Med* 2008; 102(12): 1737-1743.
92. Luo YM, Hart N, Mustafa N, Man WD, Rafferty GF, Polkey MI, Moxham J.

Reproducibility of twitch and sniff transdiaphragmatic pressures. *Respiratory physiology & neurobiology* 2002; 132(3): 301-306.

93. Koulouris N, Mulvey DA, Laroche CM, Sawicka EH, Green M, Moxham J. The measurement of inspiratory muscle strength by sniff esophageal, nasopharyngeal, and mouth pressures. *The American review of respiratory disease* 1989; 139(3): 641-646.

94. Esau SA, Bye PT, Pardy RL. Changes in rate of relaxation of sniffs with diaphragmatic fatigue in humans. *Journal of applied physiology: respiratory, environmental and exercise physiology* 1983; 55(3): 731-735.

95. Mulvey DA, Elliott MW, Koulouris NG, Carroll MP, Moxham J, Green M. Sniff esophageal and nasopharyngeal pressures and maximal relaxation rates in patients with respiratory dysfunction. *The American review of respiratory disease* 1991; 143(5 Pt 1): 950-953.

96. Quijano-Roy S, Khirani S, Colella M, Ramirez A, Aloui S, Wehbi S, de Becdelievre A, Carlier RY, Allamand V, Richard P, Azzi V, Estournet B, Fauroux B. Diaphragmatic dysfunction in Collagen VI myopathies. *Neuromuscular Disorders* 2014; 24(2): 125-133.

97. Evans SA, Watson L, Hawkins M, Cowley AJ, Johnston ID, Kinnear WJ. Respiratory muscle strength in chronic heart failure. *Thorax* 1995; 50(6): 625-628.

98. Mills GH, Kyroussis D, Hamnegard CH, Wragg S, Polkey MI, Moxham J, Green M. Cervical magnetic stimulation of the phrenic nerves in bilateral diaphragm paralysis. *Am J Respir Crit Care Med* 1997; 155(5): 1565-1569.

99. Verin E, Marie JP, Tardif C, Denis P. Spontaneous recovery of diaphragmatic strength in unilateral diaphragmatic paralysis. *Respir Med* 2006; 100(11): 1944-1951.

100. Ward K, Seymour J, Steier J, Jolley CJ, Polkey MI, Kalra L, Moxham J. Acute ischaemic hemispheric stroke is associated with impairment of reflex in addition to voluntary cough. *Eur*

*Respir J* 2010; 36(6): 1383-1390.

101. Criner G, Cordova FC, Leyenson V, Roy B, Travaline J, Sudarshan S, O'Brien G, Kuzma AM, Furukawa S. Effect of lung volume reduction surgery on diaphragm strength. *Am J Respir Crit Care Med* 1998; 157(5 Pt 1): 1578-1585.

102. Laghi F, Jubran A, Topeli A, Fahey P, Garrity E, Arcidi J, de Pinto D, Edwards L, Tobin M. Effect of lung volume reduction surgery on neuromechanical coupling of the diaphragm. *Am J Respir Crit Care Med* 1998; 157(2): 475-483.

103. Kyroussis D, Polkey MI, Keilty SE, Mills GH, Hamnegard CH, Moxham J, Green M. Exhaustive exercise slows inspiratory muscle relaxation rate in chronic obstructive pulmonary disease. *Am J Respir Crit Care Med* 1996; 153(2): 787-793.

104. Caggiano S, Khirani S, Dabaj I, Cavassa E, Amaddeo A, Arroyo JO, Desguerre I, Richard P, Cutrera R, Ferreiro A, Estournet B, Quijano-Roy S, Fauroux B. Diaphragmatic dysfunction in SEPN1-related myopathy. *Neuromuscul Disord* 2017; 27(8): 747-755.

105. Laghi F, Cattapan SE, Jubran A, Parthasarathy S, Warshawsky P, Choi YS, Tobin MJ. Is weaning failure caused by low-frequency fatigue of the diaphragm? *American journal of respiratory and critical care medicine* 2003; 167(2): 120-127.

106. Dube BP, Vermeulen F, Laveneziana P. Exertional Dyspnoea in Chronic Respiratory Diseases: From Physiology to Clinical Application. *Archivos de bronconeumologia* 2017; 53(2): 62-70.

107. Hudson AL, Laveneziana P. Do we "drive" dyspnoea? *The European respiratory journal* 2015; 45(2): 301-304.

108. Laveneziana P, Bruni GI, Presi I, Stendardi L, Duranti R, Scano G. Tidal volume inflection and its sensory consequences during exercise in patients with stable asthma.

*Respiratory physiology & neurobiology* 2013; 185(2): 374-379.

109. Laveneziana P, Garcia G, Joureau B, Nicolas-Jilwan F, Brahim T, Laviolette L, Sitbon O, Simonneau G, Humbert M, Similowski T. Dynamic respiratory mechanics and exertional dyspnoea in pulmonary arterial hypertension. *The European respiratory journal* 2013; 41(3): 578-587.

110. Laveneziana P, Guenette JA, Webb KA, O'Donnell DE. New physiological insights into dyspnea and exercise intolerance in chronic obstructive pulmonary disease patients. *Expert review of respiratory medicine* 2012; 6(6): 651-662.

111. Laveneziana P, Humbert M, Godinas L, Joureau B, Malrin R, Straus C, Jais X, Sitbon O, Simonneau G, Similowski T, Garcia G. Inspiratory muscle function, dynamic hyperinflation and exertional dyspnoea in pulmonary arterial hypertension. *The European respiratory journal* 2015; 45(5): 1495-1498.

112. Laveneziana P, Lotti P, Coli C, Binazzi B, Chiti L, Stendardi L, Duranti R, Scano G. Mechanisms of dyspnoea and its language in patients with asthma. *The European respiratory journal* 2006; 27(4): 742-747.

113. Laveneziana P, Montani D, Dorfmueller P, Girerd B, Sitbon O, Jais X, Savale L, Eyries M, Soubrier F, Similowski T, Simonneau G, Humbert M, Garcia G. Mechanisms of exertional dyspnoea in pulmonary veno-occlusive disease with EIF2AK4 mutations. *Eur Respir J* 2014; 44(4): 1069-1072.

114. Laveneziana P, O'Donnell DE, Ofir D, Agostoni P, Padeletti L, Ricciardi G, Palange P, Duranti R, Scano G. Effect of biventricular pacing on ventilatory and perceptual responses to

exercise in patients with stable chronic heart failure. *J Appl Physiol* (1985) 2009: 106(5): 1574-1583.

115. Laveneziana P, Palange P. Physical activity, nutritional status and systemic inflammation in COPD. *Eur Respir J* 2012; 40(3): 522-529.

116. Laveneziana P, Valli G, Onorati P, Paoletti P, Ferrazza AM, Palange P. Effect of heliox on heart rate kinetics and dynamic hyperinflation during high-intensity exercise in COPD. *European journal of applied physiology* 2011; 111(2): 225-234.

117. Laveneziana P, Webb KA, Ora J, Wadell K, O'Donnell DE. Evolution of dyspnea during exercise in chronic obstructive pulmonary disease: impact of critical volume constraints. *American journal of respiratory and critical care medicine* 2011; 184(12): 1367-1373.

118. Laveneziana P, Webb KA, Wadell K, Neder JA, O'Donnell DE. Does expiratory muscle activity influence dynamic hyperinflation and exertional dyspnea in COPD? *Respiratory physiology & neurobiology* 2014; 199: 24-33.

119. Laviolette L, Laveneziana P. Dyspnoea: a multidimensional and multidisciplinary approach. *Eur Respir J* 2014; 43(6): 1750-1762.

120. O'Donnell DE, Laveneziana P. The clinical importance of dynamic lung hyperinflation in COPD. *Copd* 2006; 3(4): 219-232.

121. O'Donnell DE, Laveneziana P, Webb K, Neder JA. Chronic obstructive pulmonary disease: clinical integrative physiology. *Clinics in chest medicine* 2014; 35(1): 51-69.

122. Puente-Maestu L, Palange P, Casaburi R, Laveneziana P, Maltais F, Neder JA, O'Donnell DE, Onorati P, Porszasz J, Rabinovich R, Rossiter HB, Singh S, Troosters T, Ward S. Use of exercise testing in the evaluation of interventional efficacy: an official ERS statement. *The European respiratory journal* 2016; 47(2): 429-460.

123. Guenette JA, Webb KA, O'Donnell DE. Does dynamic hyperinflation contribute to dyspnoea during exercise in patients with COPD? *The European respiratory journal* 2012; 40(2): 322-329.
124. O'Donnell DE, Guenette JA, Maltais F, Webb KA. Decline of resting inspiratory capacity in COPD: the impact on breathing pattern, dyspnea, and ventilatory capacity during exercise. *Chest* 2012; 141(3): 753-762.
125. O'Donnell DE, Deesomchok A, Lam YM, Guenette JA, Amornputtisathaporn N, Forkert L, Webb KA. Effects of BMI on static lung volumes in patients with airway obstruction. *Chest* 2011; 140(2): 461-468.
126. Laghi F, Tobin MJ. Disorders of the respiratory muscles. *Am J Respir Crit Care Med* 2003; 168(1): 10-48.
127. Hussain O, Collins E, Adiguzel N, Langbein WE, Tobin M, Laghi F. Contrasting pressure-support ventilation and helium-oxygen during exercise in severe COPD. *Respir Med* 2011; 105(3): 494-505.
128. Casanova C, Cote C, de Torres JP, Aguirre-Jaime A, Marin JM, Pinto-Plata V, Celli BR. Inspiratory-to-total lung capacity ratio predicts mortality in patients with chronic obstructive pulmonary disease. *Am J Respir Crit Care Med* 2005; 171(6): 591-597.
129. Tantucci C, Donati P, Nicosia F, Bertella E, Redolfi S, De Vecchi M, Corda L, Grassi V, Zulli R. Inspiratory capacity predicts mortality in patients with chronic obstructive pulmonary disease. *Respir Med* 2008; 102(4): 613-619.
130. Celli BR, Decramer M, Lystig T, Kesten S, Tashkin DP. Longitudinal inspiratory capacity changes in chronic obstructive pulmonary disease. *Respir Res* 2012; 13: 66.



131. Stubbing DG, Pengelly LD, Morse JL, Jones NL. Pulmonary mechanics during exercise in normal males. *Journal of applied physiology: respiratory, environmental and exercise physiology* 1980; 49(3): 506-510.
132. Agostoni P, Pellegrino R, Conca C, Rodarte JR, Brusasco V. Exercise hyperpnea in chronic heart failure: relationships to lung stiffness and expiratory flow limitation. *Journal of applied physiology* 2002; 92(4): 1409-1416.
133. Stubbing DG, Pengelly LD, Morse JL, Jones NL. Pulmonary mechanics during exercise in subjects with chronic airflow obstruction. *Journal of applied physiology: respiratory, environmental and exercise physiology* 1980; 49(3): 511-515.
134. Yan S, Kaminski D, Sliwinski P. Reliability of inspiratory capacity for estimating end-expiratory lung volume changes during exercise in patients with chronic obstructive pulmonary disease. *American journal of respiratory and critical care medicine* 1997; 156(1): 55-59.
135. Younes M, Kivinen G. Respiratory mechanics and breathing pattern during and following maximal exercise. *Journal of applied physiology: respiratory, environmental and exercise physiology* 1984; 57(6): 1773-1782.
136. Tobin MJ. Monitoring respiratory mechanics in spontaneously breathing patients. In: Tobin MJ, ed. *Principles and Practice of Intensive Care Monitoring*. McGraw-Hill New York, 1998; pp. 617-654.
137. Laghi F. Assessment of respiratory output in mechanically ventilated patients. *Respir Care Clin N Am* 2005; 11(2): 173-199.
138. Akoumianaki E, Maggiore SM, Valenza F, Bellani G, Jubran A, Loring SH, Pelosi P, Talmor D, Grasso S, Chiumello D, Guerin C, Patroniti N, Ranieri VM, Gattinoni L, Nava S, Terragni PP, Pesenti A, Tobin M, Mancebo J, Brochard L, Group PW. The application of

esophageal pressure measurement in patients with respiratory failure. *Am J Respir Crit Care Med* 2014; 189(5): 520-531.

139. Roussos C, Zakynthinos S. Respiratory Muscle Energetics. *In:* Roussos C, ed. The Thorax. Marcel Dekker, New York, 1995; pp. 681-749.

140. Field S, Sanci S, Grassino A. Respiratory muscle oxygen consumption estimated by the diaphragm pressure-time index. *J Appl Physiol Respir Environ Exerc Physiol* 1984; 57(1): 44-51.

141. Field S, Kelly SM, Macklem PT. The oxygen cost of breathing in patients with cardiorespiratory disease. *Am Rev Respir Dis* 1982; 126(1): 9-13.

142. Tobin MJ, Laghi F, Jubran A. Ventilatory failure, ventilator support, and ventilator weaning. *Compr Physiol* 2012; 2(4): 2871-2921.

143. Kyroussis D, Mills GH, Polkey MI, Hamnegard CH, Koulouris N, Green M, Moxham J. Abdominal muscle fatigue after maximal ventilation in humans. *Journal of applied physiology* 1996; 81(4): 1477-1483.

144. Hamnegard CH, Wragg S, Kyroussis D, Mills GH, Polkey MI, Moran J, Road J, Bake B, Green M, Moxham J. Diaphragm fatigue following maximal ventilation in man. *Eur Respir J* 1996; 9(2): 241-247.

145. Maltais F, Reissmann H, Gottfried SB. Pressure support reduces inspiratory effort and dyspnea during exercise in chronic airflow obstruction. *Am J Respir Crit Care Med* 1995; 151(4): 1027-1033.

146. Sassooun CS, Lodia R, Light RW, Mahutte CK. Maximum inspiratory muscle endurance capacity during resistive loading in chronic obstructive pulmonary disease. *Respiration; international review of thoracic diseases* 1990; 57(5): 343-350.

147. Polkey MI, Kyroussis D, Hamnegard CH, Mills GH, Hughes PD, Green M, Moxham J. Diaphragm performance during maximal voluntary ventilation in chronic obstructive pulmonary disease. *American journal of respiratory and critical care medicine* 1997; 155(2): 642-648.
148. Lessard MR, Lofaso F, Brochard L. Expiratory muscle activity increases intrinsic positive end-expiratory pressure independently of dynamic hyperinflation in mechanically ventilated patients. *American journal of respiratory and critical care medicine* 1995; 151(2 Pt 1): 562-569.
149. Vitacca M, Porta R, Bianchi L, Clini E, Ambrosino N. Differences in spontaneous breathing pattern and mechanics in patients with severe COPD recovering from acute exacerbation. *Eur Respir J* 1999; 13(2): 365-370.
150. Jubran A, Tobin MJ. Pathophysiologic basis of acute respiratory distress in patients who fail a trial of weaning from mechanical ventilation. *Am J Respir Crit Care Med* 1997; 155(3): 906-915.
151. Duranti R, Bonetti L, Vivoli P, Benedetti T, Binazzi B, Laveneziana P, Scano G. Dyspnea during exercise in hyperbaric conditions. *Med Sci Sports Exerc* 2006; 38(11): 1932-1938.
152. Kushida CA. The use of esophageal manometry in the diagnosis of sleep-related breathing disorders. *Conf Proc IEEE Eng Med Biol Soc* 2004; 5: 3860-3863.
153. Jubran A, Grant BJ, Laghi F, Parthasarathy S, Tobin MJ. Weaning prediction: esophageal pressure monitoring complements readiness testing. *Am J Respir Crit Care Med* 2005; 171(11): 1252-1259.
154. Faisal A, Alghamdi BJ, Ciavaglia CE, Elbehairy AF, Webb KA, Ora J, Neder JA, O'Donnell DE. Common Mechanisms of Dyspnea in Chronic Interstitial and Obstructive Lung Disorders. *Am J Respir Crit Care Med* 2016; 193(3): 299-309.

155. Armaganidis A, Roussos C. Measurement of the Work of Breathing in the Critically Ill patient. *In*: Roussos C, ed. *The Thorax*. Marcel Dekker, New York, 1995; pp. 1231-1274.
156. Zocchi L, Fitting JW, Majani U, Fracchia C, Rampulla C, Grassino A. Effect of pressure and timing of contraction on human rib cage muscle fatigue. *The American review of respiratory disease* 1993; 147(4): 857-864.
157. Bellemare F, Grassino A. Effect of pressure and timing of contraction on human diaphragm fatigue. *J Appl Physiol* 1982; 53(5): 1190-1195.
158. Laghi F, Topeli A, Tobin MJ. Does resistive loading decrease diaphragmatic contractility before task failure? *J Appl Physiol* 1998; 85(3): 1103-1112.
159. Petrof BJ, Calderini E, Gottfried SB. Effect of CPAP on respiratory effort and dyspnea during exercise in severe COPD. *J Appl Physiol* 1990; 69(1): 179-188.
160. Eves ND, Petersen SR, Haykowsky MJ, Wong EY, Jones RL. Helium-hyperoxia, exercise, and respiratory mechanics in chronic obstructive pulmonary disease. *Am J Respir Crit Care Med* 2006; 174(7): 763-771.
161. Collins EG, Langbein WE, Fehr L, O'Connell S, Jelinek C, Hagarty E, Edwards L, Reda D, Tobin MJ, Laghi F. Can ventilation-feedback training augment exercise tolerance in patients with chronic obstructive pulmonary disease? *Am J Respir Crit Care Med* 2008; 177(8): 844-852.
162. Macklem PT. Therapeutic implications of the pathophysiology of COPD. *Eur Respir J* 2010; 35(3): 676-680.
163. Spahija J, de Marchie M, Grassino A. Effects of imposed pursed-lips breathing on respiratory mechanics and dyspnea at rest and during exercise in COPD. *Chest* 2005; 128(2): 640-650.

164. Breslin EH. The pattern of respiratory muscle recruitment during pursed-lip breathing. *Chest* 1992; 101(1): 75-78.
165. Hyatt RE. The interrelationships of pressure, flow, and volume during various respiratory maneuvers in normal and emphysematous subjects. *The American review of respiratory disease* 1961; 83: 676-683.
166. Johnson BD, Weisman IM, Zeballos RJ, Beck KC. Emerging concepts in the evaluation of ventilatory limitation during exercise: the exercise tidal flow-volume loop. *Chest* 1999; 116(2): 488-503.
167. Araujo CG, Vianna LC. How often does spirometry testing induce cardiac arrhythmias? *Prim Care Respir J* 2009; 18(3): 185-188.
168. Fields CL, Byrd RP, Jr., Ossorio MA, Roy TM, Michaels MJ, Vogel RL. Cardiac arrhythmias during performance of the flow-volume loop. *Chest* 1993; 103(4): 1006-1009.
169. Guenette JA, Dominelli PB, Reeve SS, Durkin CM, Eves ND, Sheel AW. Effect of thoracic gas compression and bronchodilation on the assessment of expiratory flow limitation during exercise in healthy humans. *Respiratory physiology & neurobiology* 2010; 170(3): 279-286.
170. Ingram RH, Jr., Schilder DP. Effect of gas compression on pulmonary pressure, flow, and volume relationship. *J Appl Physiol* 1966; 21(6): 1821-1826.
171. Beck KC, Offord KP, Scanlon PD. Bronchoconstriction occurring during exercise in asthmatic subjects. *American journal of respiratory and critical care medicine* 1994; 149(2 Pt 1): 352-357.
172. D'Angelo E, Prandi E, Marazzini L, Milic-Emili J. Dependence of maximal flow-volume curves on time course of preceding inspiration in patients with chronic obstruction pulmonary

disease. *American journal of respiratory and critical care medicine* 1994; 150(6 Pt 1): 1581-1586.

173. Koulouris NG, Rapakoulis P, Rassidakis A, Dimitroulis J, Gaga M, Milic-Emili J, Jordanoglou J. Dependence of forced vital capacity manoeuvre on time course of preceding inspiration in patients with restrictive lung disease. *Eur Respir J* 1997; 10(10): 2366-2370.

174. Mota S, Casan P, Drobic F, Giner J, Ruiz O, Sanchis J, Milic-Emili J. Expiratory flow limitation during exercise in competition cyclists. *Journal of applied physiology* 1999; 86(2): 611-616.

175. Fairshir RD. Airway hysteresis in normal subjects and individuals with chronic airflow obstruction. *Journal of applied physiology* 1985; 58(5): 1505-1510.

176. Melissinos CG, Webster P, Tien YK, Mead J. Time dependence of maximum flow as an index of nonuniform emptying. *Journal of applied physiology: respiratory, environmental and exercise physiology* 1979; 47(5): 1043-1050.

177. Boczkowski J, Murciano D, Pichot MH, Ferretti A, Pariente R, Milic-Emili J. Expiratory flow limitation in stable asthmatic patients during resting breathing. *American journal of respiratory and critical care medicine* 1997; 156(3 Pt 1): 752-757.

178. Goetghebeur D, Sarni D, Grossi Y, Leroyer C, Ghezzi H, Milic-Emiri J, Bellet M. Tidal expiratory flow limitation and chronic dyspnoea in patients with cystic fibrosis. *Eur Respir J* 2002; 19(3): 492-498.

179. Hadcroft J, Calverley PM. Alternative methods for assessing bronchodilator reversibility in chronic obstructive pulmonary disease. *Thorax* 2001; 56(9): 713-720.

180. Koulouris NG, Dimopoulou I, Valta P, Finkelstein R, Cosio MG, Milic-Emili J. Detection of expiratory flow limitation during exercise in COPD patients. *Journal of applied*

*physiology* 1997; 82(3): 723-731.

181. Koulouris NG, Valta P, Lavoie A, Corbeil C, Chasse M, Braidy J, Milic-Emili J. A simple method to detect expiratory flow limitation during spontaneous breathing. *Eur Respir J* 1995; 8(2): 306-313.

182. Tantucci C, Duguet A, Similowski T, Zelter M, Derenne JP, Milic-Emili J. Effect of salbutamol on dynamic hyperinflation in chronic obstructive pulmonary disease patients. *Eur Respir J* 1998; 12(4): 799-804.

183. Koulouris NG, Kaltsakas G, Palamidas AF, Gennimata SA. Methods for Assessing Expiratory Flow Limitation during Tidal Breathing in COPD Patients. *Pulm Med* 2012; 2012: 234145.

184. Carrera HL, Marcus CL, McDonough JM, Oliva Morera JC, Huang J, Farre R, Montserrat JM. Negative Expiratory Pressure Technique: An Awake Test to Measure Upper Airway Collapsibility in Adolescents. *Sleep* 2015; 38(11): 1783-1791.

185. Hirata RP, Schorr F, Kayamori F, Moriya HT, Romano S, Insalaco G, Gebrim EM, de Oliveira LV, Genta PR, Lorenzi-Filho G. Upper Airway Collapsibility Assessed by Negative Expiratory Pressure while Awake is Associated with Upper Airway Anatomy. *Journal of clinical sleep medicine : JCSM : official publication of the American Academy of Sleep Medicine* 2016; 12(10): 1339-1346.

186. Baydur A, Milic-Emili J. Expiratory flow limitation during spontaneous breathing: comparison of patients with restrictive and obstructive respiratory disorders. *Chest* 1997; 112(4): 1017-1023.

187. Koulouris NG, Hardavella G. Physiological techniques for detecting expiratory flow limitation during tidal breathing. *Eur Respir Rev* 2011; 20(121): 147-155.

188. Walker R, Paratz J, Holland AE. Reproducibility of the negative expiratory pressure technique in COPD. *Chest* 2007; 132(2): 471-476.
189. Valta P, Corbeil C, Lavoie A, Campodonico R, Koulouris N, Chasse M, Braidy J, Milic-Emili J. Detection of expiratory flow limitation during mechanical ventilation. *American journal of respiratory and critical care medicine* 1994; 150(5 Pt 1): 1311-1317.
190. Eltayara L, Becklake MR, Volta CA, Milic-Emili J. Relationship between chronic dyspnea and expiratory flow limitation in patients with chronic obstructive pulmonary disease. *American journal of respiratory and critical care medicine* 1996; 154(6 Pt 1): 1726-1734.
191. Chiari S, Bassini S, Braghini A, Corda L, Boni E, Tantucci C. Tidal expiratory flow limitation at rest as a functional marker of pulmonary emphysema in moderate-to-severe COPD. *Copd* 2014; 11(1): 33-38.
192. Jones MH, Davis SD, Kisling JA, Howard JM, Castile R, Tepper RS. Flow limitation in infants assessed by negative expiratory pressure. *Am J Respir Crit Care Med* 2000; 161(3 Pt 1): 713-717.
193. Tauber E, Fazekas T, Eichler I, Eichstill C, Gartner C, Koller DY, Frischer T. Negative expiratory pressure: a new tool for evaluating lung function in children? *Pediatr Pulmonol* 2003; 35(3): 162-168.
194. Chiari S, Torregiani C, Boni E, Bassini S, Vizzardi E, Tantucci C. Dynamic pulmonary hyperinflation occurs without expiratory flow limitation in chronic heart failure during exercise. *Respiratory physiology & neurobiology* 2013; 189(1): 34-41.
195. Baydur A, Vigen C, Chen Z. Expiratory Flow Limitation in Obstructive Sleep Apnea and COPD: A Quantitative Method to Detect Pattern Differences Using the Negative Expiratory Pressure Technique. *Open Respir Med J* 2012; 6: 111-120.



196. Alvisi V, Marangoni E, Zannoli S, Uneddu M, Uggento R, Farabegoli L, Ragazzi R, Milic-Emili J, Belloni GP, Alvisi R, Volta CA. Pulmonary function and expiratory flow limitation in acute cervical spinal cord injury. *Arch Phys Med Rehabil* 2012; 93(11): 1950-1956.
197. Chlif M, Temfemo A, Keochkerian D, Choquet D, Chaouachi A, Ahmaidi S. Advanced Mechanical Ventilatory Constraints During Incremental Exercise in Class III Obese Male Subjects. *Respiratory care* 2015; 60(4): 549-560.
198. Guenette JA, Witt JD, McKenzie DC, Road JD, Sheel AW. Respiratory mechanics during exercise in endurance-trained men and women. *The Journal of physiology* 2007; 581(Pt 3): 1309-1322.
199. Miller MR, Hankinson J, Brusasco V, Burgos F, Casaburi R, Coates A, Crapo R, Enright P, van der Grinten CP, Gustafsson P, Jensen R, Johnson DC, MacIntyre N, McKay R, Navajas D, Pedersen OF, Pellegrino R, Viegi G, Wanger J. Standardisation of spirometry. *Eur Respir J* 2005; 26(2): 319-338.
200. Hegewald MJ, Crapo R. Pulmonary Function Testing. In: Mason R, Broaddus V, Martin T, King T, Schraufnagel D, Murray J, Nadel J, eds. Textbook of Respiratory Medicine. Saunders Elsevier, Philadelphia, 2010; pp. 522-553.
201. Aboussouan L, Stoller J. Flow-Volume Loops. 2016 [cited; Available from: <https://www.uptodate.com/contents/flow-volume-loops/print>]
202. Vincken W, Ghezze H, Cosio MG. Maximal Static Respiratory Pressures in Adults - Normal Values and Their Relationship to Determinants of Respiratory-Function. *B Eur Physiopath Res* 1987; 23(5): 435-439.
203. Vincken WG, Cosio MG. Flow oscillations on the flow-volume loop: clinical and physiological implications. *Eur Respir J* 1989; 2(6): 543-549.

204. De Troyer A, Borenstein S, Cordier R. Analysis of lung volume restriction in patients with respiratory muscle weakness. *Thorax* 1980; 35(8): 603-610.
205. Ward NS, Hill NS. Pulmonary function testing in neuromuscular disease. *Clinics in chest medicine* 2001; 22(4): 769-781.
206. Epstein SK. Respiratory Muscle Weakness Due to Neuromuscular Disease: Clinical Manifestations and Evaluation. Wolters Kluwer, Alphen-sur-le-Rhin, 2015.
207. Moxham J. Tests of Respiratory Muscle Strength. Wolters Kluwer, Alphen-sur-le-Rhin, 2016.
208. Mier A, Brophy C, Moxham J, Green M. Twitch pressures in the assessment of diaphragm weakness. *Thorax* 1989; 44: 990-996.
209. Laghi F, Harrison MJ, Tobin MJ. Comparison of magnetic and electrical phrenic nerve stimulation in assessment of diaphragmatic contractility. *J Appl Physiol* 1996; 80(5): 1731-1742.
210. Burke D. Effects of activity on axonal excitability: implications for motor control studies. *Adv Exp Med Biol* 2002; 508: 33-37.
211. Vagg R, Mogyoros I, Kiernan MC, Burke D. Activity-dependent hyperpolarization of human motor axons produced by natural activity. *J Physiol* 1998; 507 ( Pt 3): 919-925.
212. Wragg S, Hamnegard C, Road J, Kyroussis D, Moran J, Green M, Moxham J. Potentiation of diaphragmatic twitch after voluntary contraction in normal subjects. *Thorax* 1994; 49(12): 1234-1237.
213. Froyd C, Millet GY, Noakes TD. The development of peripheral fatigue and short-term recovery during self-paced high-intensity exercise. *The Journal of physiology* 2013; 591(5): 1339-1346.
214. Mador MJ, Magalang UJ, Kufel TJ. Twitch potentiation following voluntary

diaphragmatic contraction. *Am J Respir Crit Care Med* 1994; 149(3 Pt 1): 739-43

215. Similowski T, Yan S, Gauthier AP, Macklem PT, Bellemare F. Contractile properties of the human diaphragm during chronic hyperinflation. *N Engl J Med* 1991; 325: 917-923.

216. Smith J, Bellemare F. Effect of lung volume on in vivo contraction characteristics of human diaphragm. *J Appl Physiol* 1987; 62: 1893-1900.

217. Laghi F, Jubran A, Topeli A, Fahey P, Garrity E, de Pinto D, Tobin M. Loyola/Hines Lung Volume Reduction Surgery Research Group. Effect of lung volume reduction surgery on diaphragmatic neuromechanical coupling at 2 years. *Chest* 2004; 125(6): 2188-2195.

218. Polkey MI, Hamnegard C-H, Hughes PD, Rafferty GF, Green M, Moxham J. Influence of acute lung volume change on contractile properties of the human diaphragm. *J Appl Physiol* 1998; 85: 1322-1328.

219. Similowski T, Fleury B, Launois S, Cathala HP, Bouche P, Derenne JP. Cervical magnetic stimulation: a new painless method for bilateral phrenic nerve stimulation in conscious humans. *J Appl Physiol* 1989; 67: 1311-1318.

220. Polkey MI, Duguet A, Luo Y, Hughes PD, Hart N, Hamnegard CH, Green M, Similowski T, Moxham J. Anterior magnetic phrenic nerve stimulation: laboratory and clinical evaluation. *Intensive Care Med* 2000; 26(8): 1065-1075.

221. Mills GH, Kyroussis D, Hamnegard C-H, Wragg S, Moxham J, Green M. Unilateral magnetic stimulation of the phrenic nerve. *Thorax* 1995; 50: 1162-1172.

222. Polkey MI, Kyroussis D, Hamnegard CH, Hughes PD, Rafferty GF, Moxham J, Green M. Paired phrenic nerve stimuli for the detection of diaphragm fatigue in humans. *Eur Respir J* 1997; 10(8): 1859-1864.

223. Kabitz HJ, Walker D, Waltersbacher S, Windisch W. Controlled twitch mouth pressure

reliably predicts twitch esophageal pressure. *Respiratory physiology & neurobiology* 2007: 156(3): 276-282.

224. Laghi F, Tobin M. Relationship between transdiaphragmatic and mouth twitch pressures at functional residual capacity. *Eur Respir J* 1997: 10(3): 530-536.

225. Topeli A, Laghi F, Tobin M. Can diaphragmatic contractility be assessed by twitch airway pressures in patients with chronic obstructive pulmonary disease? *Am J Respir Crit Care Med* 1999: 160(4): 1369-1374.

226. de Bruin PF, Watson RA, Khalil N, Pride NB. Use of mouth pressure twitches induced by cervical magnetic stimulation to assess voluntary activation of the diaphragm. *Eur Respir J* 1998: 12(3): 672-678.

227. Hamnegård C-H, Wragg S, Kyroussis D, Mills G, Bake B, Green M, Moxham J. Mouth pressure in response to magnetic stimulation of the phrenic nerves. *Thorax* 1995: 50: 620-624.

228. Bachasson D, Wuyam B, Pepin JL, Tamisier R, Levy P, Verges S. Quadriceps and respiratory muscle fatigue following high-intensity cycling in COPD patients. *PloS one* 2013: 8(12): e83432.

229. Janssens L, Brumagne S, McConnell AK, Hermans G, Troosters T, Gayan-Ramirez G. Greater diaphragm fatigability in individuals with recurrent low back pain. *Respiratory physiology & neurobiology* 2013: 188(2): 119-123.

230. Polkey MI, Kyroussis D, Keilty SE, Hamnegard CH, Mills GH, Green M, Moxham J. Exhaustive treadmill exercise does not reduce twitch transdiaphragmatic pressure in patients with COPD. *Am J Respir Crit Care Med* 1995: 152(3): 959-964.

231. Reilly CC, Ward K, Jolley CJ, Frank LA, Elston C, Moxham J, Rafferty GF. Effect of endurance exercise on respiratory muscle function in patients with cystic fibrosis. *Respiratory*

*physiology & neurobiology* 2012; 180(2-3): 316-322.

232. Dayer MJ, Hopkinson NS, Ross ET, Jonville S, Sharshar T, Kearney M, Moxham J, Polkey MI. Does symptom-limited cycle exercise cause low frequency diaphragm fatigue in patients with heart failure? *European journal of heart failure* 2006; 8(1): 68-73.

233. Elia D, Kelly JL, Martolini D, Renzoni EA, Boutou AK, Chetta A, Polkey MI, Hopkinson NS. Respiratory muscle fatigue following exercise in patients with interstitial lung disease. *Respiration; international review of thoracic diseases* 2013; 85(3): 220-227.

234. Mador MJ, Acevedo FA. Effect of respiratory muscle fatigue on subsequent exercise performance. *J Appl Physiol* 1991; 70(5): 2059-2065.

235. Verges S, Sager Y, Erni C, Spengler CM. Expiratory muscle fatigue impairs exercise performance. *Eur J Appl Physiol* 2007; 101(2): 225-232.

236. Johnson BD, Babcock MA, Suman OE, Dempsey JA. Exercise-induced diaphragmatic fatigue in healthy humans. *J Physiol (Lond)* 1993; 460: 385-405.

237. Wuthrich TU, Marty J, Benaglia P, Eichenberger PA, Spengler CM. Acute Effects of a Respiratory Sprint-Interval Session on Muscle Contractility. *Medicine and science in sports and exercise* 2015; 47(9): 1979-1987.

238. Verges S, Schulz C, Perret C, Spengler CM. Impaired abdominal muscle contractility after high-intensity exhaustive exercise assessed by magnetic stimulation. *Muscle & nerve* 2006; 34(4): 423-430.

239. Dimitriou G, Greenough A, Moxham J, Rafferty GF. Influence of maturation on infant diaphragm function assessed by magnetic stimulation of phrenic nerves. *Pediatr Pulmonol* 2003; 35(1): 17-22.

240. Hart N, Tounian P, Clément A, Boulé M, Polkey MI, Lofaso F, Fauroux B. Nutritional

status is an important predictor of diaphragm strength in young patients with cystic fibrosis. *Am J Clin Nutr* 2004; 80: 1201-1206.

241. Rafferty GF, Greenough A, Dimitriou G, Kavadia V, Laubscher B, Polkey MI, Harris ML, Moxham J. Assessment of neonatal diaphragm function using magnetic stimulation of the phrenic nerves. *Am J Respir Crit Care Med* 2000; 162: 2337-2340.

242. Rafferty GF, Greenough A, Dimitriou G, Polkey MI, Long A, Davenport M, Moxham J. Assessment of neonatal diaphragmatic paralysis using magnetic phrenic nerve stimulation. *Pediatr Pulmonol* 1999; 27(3): 224-226.

243. Rafferty GF, Greenough A, Manczur T, Polkey MI, Harris ML, Heaton ND, Rela M, Moxham J. Magnetic phrenic nerve stimulation to assess diaphragm function in children following liver transplantation. *Pediatr Crit Care Med* 2001; 2(2): 122-126.

244. Rafferty GF, Mustafa N, Man WD, Sylvester K, Fisher A, Plaza M, Davenport M, Blaney S, Moxham J, Greenough A. Twitch airway pressure elicited by magnetic phrenic nerve stimulation in anesthetized healthy children. *Pediatr Pulmonol* 2005; 40(2): 141-147.

245. Dimitriou G, Greenough A, Kavvadia V, Davenport M, Nicolaides KH, Moxham J, Rafferty GF. Diaphragmatic function in infants with surgically corrected anomalies. *Pediatr Res* 2003; 54(4): 502-508.

246. Kassim Z, Jolley C, Moxham J, Greenough A, Rafferty GF. Diaphragm electromyogram in infants with abdominal wall defects and congenital diaphragmatic hernia. *Eur Respir J* 2011; 37(1): 143-149.

247. Laghi F, D'Alfonso N, Tobin MJ. A paper on the pace of recovery from diaphragmatic fatigue and its unexpected dividends. *Intensive Care Med*; 40(9): 1220-1226.

248. Watson AC, Hughes PD, Louise Harris M, Hart N, Ware RJ, Wendon J, Green M,

Moxham J. Measurement of twitch transdiaphragmatic, esophageal, and endotracheal tube pressure with bilateral anterolateral magnetic phrenic nerve stimulation in patients in the intensive care unit. *Crit Care Med* 2001; 29(7): 1325-1331.

249. Demoule A, Jung B, Prodanovic H, Molinari N, Chanques G, Coirault C, Matecki S, Duguet A, Similowski T, Jaber S. Diaphragm dysfunction on admission to the intensive care unit. Prevalence, risk factors, and prognostic impact-a prospective study. *Am J Respir Crit Care Med* 2013; 188(2): 213-219.

250. Dres M, Dube BP, Mayaux J, Delemazure J, Reuter D, Brochard L, Similowski T, Demoule A. Coexistence and Impact of Limb Muscle and Diaphragm Weakness at Time of Liberation from Mechanical Ventilation in Medical Intensive Care Unit Patients. *Am J Respir Crit Care Med* 2017; 195(1): 57-66.

251. Jaber S, Petrof BJ, Jung B, Chanques G, Berthet JP, Rabuel C, Bouyabrine H, Courouble P, Koechlin-Ramonatxo C, Sebbane M, Similowski T, Scheuermann V, Mebazaa A, Capdevila X, Mornet D, Mercier J, Lacampagne A, Philips A, Matecki S. Rapidly progressive diaphragmatic weakness and injury during mechanical ventilation in humans. *Am J Respir Crit Care Med*. 2011;183(3):364-71.

252. Hermans G, Agten A, Testelmans D, Decramer M, Gayan-Ramirez G. Increased duration of mechanical ventilation is associated with decreased diaphragmatic force: a prospective observational study. *Crit Care*. 2010;14(4):R127.

253. Jung B, Moury PH, Mahul M, de Jong A, Galia F, Prades A, Albaladejo P, Chanques G, Molinari N, Jaber S. Diaphragmatic dysfunction in patients with ICU-acquired weakness and its impact on extubation failure. *Intensive Care Med* 2016; 42(5): 853-861.

254. Supinski GS, Callahan LA. Diaphragm weakness in mechanically ventilated critically ill

patients. *Crit Care* 2013; 17(3): R120.

255. Dres M, Goligher EC, Dube BP, Morawiec E, Dangers L, Reuter D, Mayaux J, Similowski T, Demoule A. Diaphragm function and weaning from mechanical ventilation: an ultrasound and phrenic nerve stimulation clinical study. *Ann Intensive Care* 2018; 8(1): 53.

256. Supinski GS, Westgate P, Callahan LA. Correlation of maximal inspiratory pressure to transdiaphragmatic twitch pressure in intensive care unit patients. *Critical care* 2016; 20: 77.

257. Laghi F, Sassoon CS. Weakness in the Critically Ill: "Captain of the Men of Death" or Sign of Disease Severity? *Am J Respir Crit Care Med*. 2017;195(1):7-9.

258. Hill K, Jenkins SC, Philippe DL, Shepherd KL, Hillman DR, Eastwood PR. Comparison of incremental and constant load tests of inspiratory muscle endurance in COPD. *Eur Respir J* 2007; 30(3): 479-486.

259. Laghi F, Staikh HS, Morales D, Sinderby C, Jubran A, Tobin M. Diaphragmatic neuromechanical coupling and mechanisms of hypercapnia during inspiratory loading. *Respiratory physiology & neurobiology* 2014; 1(198): 32-41.

260. Langer D, Jacome C, Charususin N, Scheers H, McConnell A, Decramer M, Gosselink R. Measurement validity of an electronic inspiratory loading device during a loaded breathing task in patients with COPD. *Respir Med* 2013; 107(4): 633-635.

261. Hart N, Hawkins P, Hamnegard CH, Green M, Moxham J, Polkey MI. A novel clinical test of respiratory muscle endurance. *Eur Respir J* 2002; 19(2): 232-239.

262. Hill K, Cecins NM, Eastwood PR, Jenkins SC. Inspiratory muscle training for patients with chronic obstructive pulmonary disease: a practical guide for clinicians. *Arch Phys Med Rehabil* 2010; 91(9): 1466-1470.

263. Langer D, Charususin N, Jacome C, Hoffman M, McConnell A, Decramer M, Gosselink



R. Efficacy of a Novel Method for Inspiratory Muscle Training in People With Chronic Obstructive Pulmonary Disease. *Phys Ther* 2015; 95(9): 1264-1273.

264. Martyn JB, Moreno RH, Pare PD, Pardy RL. Measurement of inspiratory muscle performance with incremental threshold loading. *Am Rev Respir Dis* 1987; 135(4): 919-923.

265. McElvaney G, Fairbairn MS, Wilcox PG, Pardy RL. Comparison of two-minute incremental threshold loading and maximal loading as measures of respiratory muscle endurance. *Chest* 1989; 96(3): 557-563.

266. Weiner P, Azgad Y, Weiner M. Inspiratory muscle training during treatment with corticosteroids in humans. *Chest* 1995; 107(4): 1041-1044.

267. Morrison NJ, Richardson J, Dunn L, Pardy RL. Respiratory muscle performance in normal elderly subjects and patients with COPD. *Chest* 1989; 95(1): 90-94.

268. Charususin N, Gosselink R, Decramer M, McConnell A, Saey D, Maltais F, Derom E, Vermeersch S, van HH, Heijdra Y, Klaassen M, Glockl R, Kenn K, Langer D. Inspiratory muscle training protocol for patients with chronic obstructive pulmonary disease (IMTCO study): a multicentre randomised controlled trial. *BMJ Open* 2013; 3(8): e003101.

269. Leith DE, Bradley M. Ventilatory muscle strength and endurance training. *J Appl Physiol* 1976; 41(4): 508-516.

270. Verges S, Kruttli U, Stahl B, Frigg R, Spengler CM. Respiratory control, respiratory sensations and cycling endurance after respiratory muscle endurance training. *Advances in experimental medicine and biology* 2008; 605: 239-244.

271. Kroff J, Terblanche E. The kinanthropometric and pulmonary determinants of global respiratory muscle strength and endurance indices in an athletic population. *European journal of applied physiology* 2010; 110(1): 49-55.

272. Standardization of Spirometry, 1994 Update. American Thoracic Society. *American journal of respiratory and critical care medicine* 1995; 152(3): 1107-1136.
273. Belman MJ, Gaesser GA. Ventilatory muscle training in the elderly. *J Appl Physiol* 1988; 64(3): 899-905.
274. Belman MJ, Mittman C. Ventilatory muscle training improves exercise capacity in chronic obstructive pulmonary disease patients. *The American review of respiratory disease* 1980; 121(2): 273-280.
275. Keens TG, Krastins IR, Wannamaker EM, Levison H, Crozier DN, Bryan AC. Ventilatory muscle endurance training in normal subjects and patients with cystic fibrosis. *The American review of respiratory disease* 1977; 116(5): 853-860.
276. Levine S, Weiser P, Gillen J. Evaluation of a ventilatory muscle endurance training program in the rehabilitation of patients with chronic obstructive pulmonary disease. *The American review of respiratory disease* 1986; 133(3): 400-406.
277. Mancini DM, Henson D, LaManca J, Levine S. Evidence of reduced respiratory muscle endurance in patients with heart failure. *Journal of the American College of Cardiology* 1994; 24(4): 972-981.
278. Fairbairn MS, Coutts KC, Pardy RL, McKenzie DC. Improved respiratory muscle endurance of highly trained cyclists and the effects on maximal exercise performance. *Int J Sports Med* 1991; 12(1): 66-70.
279. Holm P, Sattler A, Fregosi RF. Endurance training of respiratory muscles improves cycling performance in fit young cyclists. *BMC Physiol* 2004; 4.
280. Mancini DM, Henson D, La Manca J, Donchez L, Levine S. Benefit of selective respiratory muscle training on exercise capacity in patients with chronic congestive heart failure.

*Circulation* 1995; 91(2): 320-329.

281. Forte VA, Jr., Leith DE, Muza SR, Fulco CS, Cymerman A. Ventilatory capacities at sea level and high altitude. *Aviation, space, and environmental medicine* 1997; 68(6): 488-493.

282. Sales AT, Fregonezi GA, Ramsook AH, Guenette JA, Lima IN, Reid WD. Respiratory muscle endurance after training in athletes and non-athletes: A systematic review and meta-analysis. *Physical therapy in sport : official journal of the Association of Chartered Physiotherapists in Sports Medicine* 2016; 17: 76-86.

283. Villiot-Danger JC, Villiot-Danger E, Borel JC, Pepin JL, Wuyam B, Verges S. Respiratory muscle endurance training in obese patients. *International journal of obesity* 2011; 35(5): 692-699.

284. Verges S, Flore P, Nantermoz G, Lafaix PA, Wuyam B. Respiratory muscle training in athletes with spinal cord injury. *International journal of sports medicine* 2009; 30(7): 526-532.

285. Vincent M, Court-Fortune I, Brun C, Camdessanche JP, Verges S, Costes F. Determination of normal values for an isocapnic hyperpnea endurance test in healthy individuals. *Respiratory physiology & neurobiology* 2016; 230: 5-10.

286. Morgan DW, Kohrt WM, Bates BJ, Skinner JS. Effects of respiratory muscle endurance training on ventilatory and endurance performance of moderately trained cyclists. *Int J Sports Med* 1987; 8(2): 88-93.

287. Stuessi C, Spengler CM, Knöpfli-Lenzin C, Markov G, Boutellier U. Respiratory muscle endurance training in humans increases cycling endurance without affecting blood gas concentrations. *European journal of applied physiology* 2001; 84(6): 582-586.

288. Verges S, Lenherr O, Haner AC, Schulz C, Spengler CM. Increased fatigue resistance of respiratory muscles during exercise after respiratory muscle endurance training. *Am J Physiol*

*Regul Integr Comp Physiol* 2007; 292(3): R1246-1253.

289. Mador MJ, Deniz O, Aggarwal A, Shaffer M, Kufel TJ, Spengler CM. Effect of respiratory muscle endurance training in patients with COPD undergoing pulmonary rehabilitation. *Chest* 2005; 128(3): 1216-1224.

290. Scherer TA, Spengler CM, Owassapian D, Imhof E, Boutellier U. Respiratory muscle endurance training in chronic obstructive pulmonary disease: impact on exercise capacity, dyspnea, and quality of life. *American journal of respiratory and critical care medicine* 2000; 162(5): 1709-1714.

291. Bieli C, Summermatter S, Boutellier U, Moeller A. Respiratory muscle training improves respiratory muscle endurance but not exercise tolerance in children with cystic fibrosis. *Pediatric pulmonology* 2017; 52(3): 331-336.

292. Van Houtte S, Vanlandewijck Y, Kiekens C, Spengler CM, Gosselink R. Patients with acute spinal cord injury benefit from normocapnic hyperpnoea training. *Journal of rehabilitation medicine* 2008; 40(2): 119-125.

293. Frank I, Briggs R, Spengler CM. Respiratory muscles, exercise performance, and health in overweight and obese subjects. *Medicine and science in sports and exercise* 2011; 43(4): 714-727.

294. Feldman JL, Del Negro CA. Looking for inspiration: new perspectives on respiratory rhythm. *Nature reviews Neuroscience* 2006; 7(3): 232-242.

295. Butler JE. Drive to the human respiratory muscles. *Respiratory physiology & neurobiology* 2007; 159(2): 115-126.

296. Schweitzer TW, Fitzgerald JW, Bowden JA, Lynne-Davies P. Spectral analysis of human inspiratory diaphragmatic electromyograms. *Journal of applied physiology: respiratory,*

*environmental and exercise physiology* 1979: 46(1): 152-165.

297. Bartolo A, Roberts C, Dzwonczyk RR, Goldman E. Analysis of diaphragm EMG signals: comparison of gating vs. subtraction for removal of ECG contamination. *Journal of applied physiology* 1996: 80(6): 1898-1902.

298. Luo YM, Moxham J, Polkey MI. Diaphragm electromyography using an oesophageal catheter: current concepts. *Clinical science* 2008: 115(8): 233-244.

299. Schmidt M, Chiti L, Hug F, Demoule A, Similowski T. Surface electromyogram of inspiratory muscles: a possible routine monitoring tool in the intensive care unit. *Br J Anaesth* 2011: 106(6): 913-914.

300. Luo YM, Lyall RA, Harris ML, Hawkins P, Hart N, Polkey MI, Moxham J. Effect of lung volume on the oesophageal diaphragm EMG assessed by magnetic phrenic nerve stimulation. *The European respiratory journal* 2000: 15(6): 1033-1038.

301. Gandevia SC, McKenzie DK. Human diaphragmatic EMG: changes with lung volume and posture during supramaximal phrenic stimulation. *Journal of applied physiology* 1986: 60(4): 1420-1428.

302. Hodges PW, Gandevia SC. Pitfalls of intramuscular electromyographic recordings from the human costal diaphragm. *Clin Neurophysiol* 2000: 111(8): 1420-1424.

303. Luo YM, Lyall RA, Lou Harris M, Rafferty GF, Polkey MI, Moxham J. Quantification of the esophageal diaphragm electromyogram with magnetic phrenic nerve stimulation. *Am J Respir Crit Care Med* 1999: 160(5 Pt 1): 1629-1634.

304. Jolley CJ, Luo YM, Steier J, Reilly C, Seymour J, Lunt A, Ward K, Rafferty GF, Polkey MI, Moxham J. Neural respiratory drive in healthy subjects and in COPD. *The European respiratory journal* 2009: 33(2): 289-297.

305. Allen GM, McKenzie DK, Gandevia SC, Bass S. Reduced voluntary drive to breathe in asthmatic subjects. *Respiration physiology* 1993; 93(1): 29-40.
306. De Troyer A, Gorman RB, Gandevia SC. Distribution of inspiratory drive to the external intercostal muscles in humans. *The Journal of physiology* 2003; 546(Pt 3): 943-954.
307. Gandevia SC, Gorman R, McKenzie DK, De Troyer A. Effects of increased ventilatory drive on motor unit firing rates in human inspiratory muscles. *Am J Respir Crit Care Med* 1999; 160(5 Pt 1): 1598-1603.
308. Luo YM, Polkey MI, Lyall RA, Moxham J. Effect of brachial plexus co-activation on phrenic nerve conduction time. *Thorax* 1999; 54(9): 765-770.
309. Similowski T, Mehiri S, Duguet A, Attali V, Straus C, Derenne JP. Comparison of magnetic and electrical phrenic nerve stimulation in assessment of phrenic nerve conduction time. *Journal of applied physiology* 1997; 82(4): 1190-1199.
310. Moxham J, Edwards RH, Aubier M, De Troyer A, Farkas G, Macklem PT, Roussos C. Changes in EMG power spectrum (high-to-low ratio) with force fatigue in humans. *Journal of applied physiology: respiratory, environmental and exercise physiology* 1982; 53(5): 1094-1099.
311. Firestone KS, Beck J, Stein H. Neurally Adjusted Ventilatory Assist for Noninvasive Support in Neonates. *Clin Perinatol* 2016; 43(4): 707-724.
312. Doorduyn J, Sinderby CA, Beck J, van der Hoeven JG, Heunks LM. Assisted Ventilation in Patients with Acute Respiratory Distress Syndrome: Lung-distending Pressure and Patient-Ventilator Interaction. *Anesthesiology* 2015; 123(1): 181-190.
313. Bellani G, Mauri T, Coppadoro A, Grasselli G, Patroniti N, Spadaro S, Sala V, Foti G, Pesenti A. Estimation of patient's inspiratory effort from the electrical activity of the diaphragm. *Crit Care Med* 2013; 41(6): 1483-1491.

314. Dres M, Schmidt M, Ferre A, Mayaux J, Similowski T, Demoule A. Diaphragm electromyographic activity as a predictor of weaning failure. *Intensive Care Med* 2012; 38(12): 2017-2025.
315. Beck J, Emeriaud G, Liu Y, Sinderby C. Neurally-adjusted ventilatory assist (NAVA) in children: a systematic review. *Minerva Anesthesiol* 2016; 82(8): 874-883.
316. Sinderby C, Navalesi P, Beck J, Skrobik Y, Comtois N, Friberg S, Gottfried SB, Lindstrom L. Neural control of mechanical ventilation in respiratory failure. *Nature medicine* 1999; 5(12): 1433-1436.
317. Chokroverty S, Hening W, Wright D, Walczak T, Goldberg J, Burger R, Belsh J, Patel B, Flynn D, Shah S, et al. Magnetic brain stimulation: safety studies. *Electroencephalogr Clin Neurophysiol* 1995; 97(1): 36-42.
318. Verin E, Ross E, Demoule A, Hopkinson N, Nickol A, Fauroux B, Moxham J, Similowski T, Polkey MI. Effects of exhaustive incremental treadmill exercise on diaphragm and quadriceps motor potentials evoked by transcranial magnetic stimulation. *Journal of applied physiology* 2004; 96(1): 253-259.
319. Jonville S, Jutand L, Similowski T, Denjean A, Delpech N. Putative protective effect of inspiratory threshold loading against exercise-induced supraspinal diaphragm fatigue. *Journal of applied physiology* 2005; 98(3): 991-998.
320. Nierat MC, Hudson AL, Chaskalovic J, Similowski T, Laviolette L. Repetitive transcranial magnetic stimulation over the supplementary motor area modifies breathing pattern in response to inspiratory loading in normal humans. *Front Physiol* 2015; 6: 273.
321. Raux M, Xie H, Similowski T, Koski L. Facilitatory conditioning of the supplementary motor area in humans enhances the corticophrenic responsiveness to transcranial magnetic

stimulation. *Journal of applied physiology* 2010; 108(1): 39-46.

322. Similowski T, Straus C, Coic L, Derenne JP. Facilitation-independent response of the diaphragm to cortical magnetic stimulation. *American journal of respiratory and critical care medicine* 1996; 154(6 Pt 1): 1771-1777.

323. Lagueny A, Arnaud A, Le Masson G, Burbaud P, Deliac P, Marthan R. Study of central and peripheral conduction to the diaphragm in 22 patients with definite multiple sclerosis. *Electromyogr Clin Neurophysiol* 1998; 38(6): 333-342.

324. Similowski T, Attali V, Bensimon G, Salachas F, Mehiri S, Arnulf I, Lacomblez L, Zelter M, Meininger V, Derenne JP. Diaphragmatic dysfunction and dyspnoea in amyotrophic lateral sclerosis. *The European respiratory journal* 2000; 15(2): 332-337.

325. Harraf F, Ward K, Man W, Rafferty G, Mills K, Polkey M, Moxham J, Kalra L. Transcranial magnetic stimulation study of expiratory muscle weakness in acute ischemic stroke. *Neurology* 2008; 71(24): 2000-2007.

326. Melo-Silva CA, Borel JC, Gakwaya S, Series F. Acute upper airway muscle and inspiratory flow responses to transcranial magnetic stimulation during sleep in apnoeic patients. *Experimental physiology* 2013; 98(4): 946-956.

327. Melo-Silva CA, Gakwaya S, Rousseau E, Series F. Consecutive transcranial magnetic stimulation twitches reduce flow limitation during sleep in apnoeic patients. *Experimental physiology* 2013; 98(9): 1366-1375.

328. Civardi C. Obstructive sleep apnoea syndrome: "through the looking glass" of transcranial magnetic stimulation. *Sleep Med* 2010; 11(9): 820-821.

329. Oliviero A, Corbo G, Tonali PA, Pilato F, Saturno E, Dileone M, Versace V, Valente S, Di Lazzaro V. Functional involvement of central nervous system in acute exacerbation of



- chronic obstructive pulmonary disease: A preliminary transcranial magnetic stimulation study. *J Neurol* 2002; 249(9): 1232-1236.
330. Civardi C, Naldi P, Cantello R. Cortico-motoneurone excitability in patients with obstructive sleep apnoea. *J Sleep Res* 2004; 13(2): 159-163.
331. Grippo A, Carrai R, Romagnoli I, Lanini B, Bianchi R, Gigliotti F, Scano G. Cortical excitability in obstructive sleep apnea syndrome: transcranial magnetic stimulation study. *Sleep* 2005; 28(12): 1547-1553.
332. Wang W, Kang J, Kong D. The central motor conductivity of genioglossus in obstructive sleep apnoea. *Respirology* 2010; 15(8): 1209-1214.
333. Series F, Wang W, Similowski T. Corticomotor control of the genioglossus in awake OSAS patients: a transcranial magnetic stimulation study. *Respir Res* 2009; 10: 74.
334. Lanza G, Lanuzza B, Arico D, Cantone M, Cosentino FI, Pennisi M, Bella R, Pennisi G, Ferri R. Direct comparison of cortical excitability to transcranial magnetic stimulation in obstructive sleep apnea syndrome and restless legs syndrome. *Sleep Med* 2015; 16(1): 138-142.
335. Joo EY, Kim HJ, Lim YH, Koo DL, Hong SB. Altered cortical excitability in patients with untreated obstructive sleep apnea syndrome. *Sleep Med* 2010; 11(9): 857-861.
336. Opie GM, Catcheside PG, Usmani ZA, Ridding MC, Semmler JG. Motor cortex plasticity induced by theta burst stimulation is impaired in patients with obstructive sleep apnoea. *Eur J Neurosci* 2013; 37(11): 1844-1852.
337. Rousseau E, Gakwaya S, Melo-Silva CA, Series F. Mechanical effects of repetitive transcranial magnetic stimulation of upper airway muscles in awake obstructive sleep apnoea subjects. *Exp Physiol* 2015; 100(5): 566-576.
338. Rousseau E, Melo-Silva CA, Gakwaya S, Series F. Effects of repetitive transcranial

magnetic stimulation of upper airway muscles during sleep in obstructive sleep apnea patients.

*Journal of applied physiology* 2016; 121(5): 1217-1225.

339. Das A, Anupa AV, Radhakrishnan A. Reduced plastic brain responses to repetitive transcranial magnetic stimulation in severe obstructive sleep apnea syndrome. *Sleep Med* 2013; 14(7): 636-640.

340. Mohamed-Hussein AA, Hamed SA, Abdel-Hakim N. Cerebral cortical dysfunction in chronic obstructive pulmonary disease: role of transcranial magnetic stimulation. *Int J Tuberc Lung Dis* 2007; 11(5): 515-521.

341. Borel JC, Melo-Silva CA, Gakwaya S, Series F. Influence of CO(2) on upper airway muscles and chest wall/diaphragm corticomotor responses assessed by transcranial magnetic stimulation in awake healthy subjects. *Journal of applied physiology* 2012; 112(5): 798-805.

342. Straus C, Locher C, Zelter M, Derenne JP, Similowski T. Facilitation of the diaphragm response to transcranial magnetic stimulation by increases in human respiratory drive. *Journal of applied physiology* 2004; 97(3): 902-912.

343. Luu BL, Saboisky JP, Taylor JL, Gandevia SC, Butler JE. TMS-evoked silent periods in scalene and parasternal intercostal muscles during voluntary breathing. *Respir Physiol Neurobiol* 2015; 216: 15-22.

344. Borel JC, Melo-Silva CA, Gakwaya S, Rousseau E, Series F. Diaphragm and genioglossus corticomotor excitability in patients with obstructive sleep apnea and control subjects. *J Sleep Res* 2016; 25(1): 23-30.

345. Locher C, Raux M, Fiamma MN, Morelot-Panzini C, Zelter M, Derenne JP, Similowski T, Straus C. Inspiratory resistances facilitate the diaphragm response to transcranial stimulation in humans. *BMC Physiol* 2006; 6: 7.

346. Sharshar T, Ross ET, Hopkinson NS, Porcher R, Nickol AH, Jonville S, Dayer MJ, Hart N, Moxham J, Lofaso F, Polkey MI. Depression of diaphragm motor cortex excitability during mechanical ventilation. *Journal of applied physiology* 2004; 97(1): 3-10.
347. Hopkinson NS, Sharshar T, Dayer MJ, Lofaso F, Moxham J, Polkey MI. The effect of acute non-invasive ventilation on corticospinal pathways to the respiratory muscles in chronic obstructive pulmonary disease. *Respiratory physiology & neurobiology* 2012; 183(1): 41-47.
348. Trinavarat P, Riccabona M. Potential of ultrasound in the pediatric chest. *Eur J Radiol* 2014; 83(9): 1507-1518.
349. Epelman M, Navarro OM, Daneman A, Miller SF. M-mode sonography of diaphragmatic motion: description of technique and experience in 278 pediatric patients. *Pediatr Radiol* 2005; 35(7): 661-667.
350. Gerscovich EO, Cronan M, McGahan JP, Jain K, Jones CD, McDonald C. Ultrasonographic evaluation of diaphragmatic motion. *J Ultrasound Med* 2001; 20(6): 597-604.
351. Cala SJ, Kenyon CM, Ferrigno G, Carnevali P, Aliverti A, Pedotti A, Macklem PT, Rochester DF. Chest wall and lung volume estimation by optical reflectance motion analysis. *Journal of applied physiology (Bethesda, Md : 1985)* 1996; 81(6): 2680-2689.
352. Aliverti A, Dellaca R, Pelosi P, Chiumello D, Gattinoni L, Pedotti A. Compartmental analysis of breathing in the supine and prone positions by optoelectronic plethysmography. *Ann Biomed Eng* 2001; 29(1): 60-70.
353. Aliverti A, Quaranta M, Chakrabarti B, Albuquerque AL, Calverley PM. Paradoxical movement of the lower ribcage at rest and during exercise in COPD patients. *Eur Respir J* 2009; 33(1): 49-60.
354. Priori R, Aliverti A, Albuquerque AL, Quaranta M, Albert P, Calverley PM. The effect of

posture on asynchronous chest wall movement in COPD. *Journal of applied physiology (Bethesda, Md : 1985)* 2013; 114(8): 1066-1075.

355. Cano Porras D, Lunardi AC, Marques da Silva CCB, Paisani DM, Stelmach R, Moriya HT, Carvalho CRF. Comparison between the phase angle and phase shift parameters to assess thoracoabdominal asynchrony in COPD patients. *Journal of applied physiology (Bethesda, Md : 1985)* 2017; 122(5): 1106-1113.

356. Dellaca RL, Ventura ML, Zannin E, Natile M, Pedotti A, Tagliabue P. Measurement of total and compartmental lung volume changes in newborns by optoelectronic plethysmography. *Pediatr Res* 2010; 67(1): 11-16.

357. Kenyon CM, Cala SJ, Yan S, Aliverti A, Scano G, Duranti R, Pedotti A, Macklem PT. Rib cage mechanics during quiet breathing and exercise in humans. *Journal of applied physiology (Bethesda, Md : 1985)* 1997; 83(4): 1242-1255.

358. Layton AM, Moran SL, Garber CE, Armstrong HF, Basner RC, Thomashow BM, Bartels MN. Optoelectronic plethysmography compared to spirometry during maximal exercise. *Respir Physiol Neurobiol* 2013; 185(2): 362-368.

359. Boudarham J, Pradon D, Prigent H, Vaugier I, Barbot F, Letilly N, Falaize L, Orlikowski D, Petitjean M, Lofaso F. Optoelectronic vital capacity measurement for restrictive diseases. *Respir Care* 2013; 58(4): 633-638.

360. Vieira DS, Hoffman M, Pereira DA, Britto RR, Parreira VF. Optoelectronic plethysmography: intra-rater and inter-rater reliability in healthy subjects. *Respir Physiol Neurobiol* 2013; 189(3): 473-476.

361. Vogiatzis I, Georgiadou O, Golemati S, Aliverti A, Kosmas E, Kastanakis E, Geladas N, Koutsoukou A, Nanas S, Zakynthinos S, Roussos C. Patterns of dynamic hyperinflation during

exercise and recovery in patients with severe chronic obstructive pulmonary disease. *Thorax* 2005; 60(9): 723-729.

362. Dellaca RL, Aliverti A, Pelosi P, Carlesso E, Chiumello D, Pedotti A, Gattinoni L. Estimation of end-expiratory lung volume variations by optoelectronic plethysmography. *Crit Care Med* 2001; 29(9): 1807-1811.

363. Aliverti A, Stevenson N, Dellaca RL, Lo Mauro A, Pedotti A, Calverley PM. Regional chest wall volumes during exercise in chronic obstructive pulmonary disease. *Thorax* 2004; 59(3): 210-216.

364. Georgiadou O, Vogiatzis I, Stratakos G, Koutsoukou A, Golemati S, Aliverti A, Roussos C, Zakynthinos S. Effects of rehabilitation on chest wall volume regulation during exercise in COPD patients. *Eur Respir J* 2007; 29(2): 284-291.

365. Wilkens H, Weingard B, Lo Mauro A, Schena E, Pedotti A, Sybrecht GW, Aliverti A. Breathing pattern and chest wall volumes during exercise in patients with cystic fibrosis, pulmonary fibrosis and COPD before and after lung transplantation. *Thorax* 2010; 65(9): 808-814.

366. Lo Mauro A, D'Angelo MG, Romei M, Motta F, Colombo D, Comi GP, Pedotti A, Marchi E, Turconi AC, Bresolin N, Aliverti A. Abdominal volume contribution to tidal volume as an early indicator of respiratory impairment in Duchenne muscular dystrophy. *Eur Respir J* 2010; 35(5): 1118-1125.

367. LoMauro A, Romei M, D'Angelo MG, Aliverti A. Determinants of cough efficiency in Duchenne muscular dystrophy. *Pediatr Pulmonol* 2014; 49(4): 357-365.

368. Romei M, D'Angelo MG, LoMauro A, Gandossini S, Bonato S, Brighina E, Marchi E, Comi GP, Turconi AC, Pedotti A, Bresolin N, Aliverti A. Low abdominal contribution to

breathing as daytime predictor of nocturnal desaturation in adolescents and young adults with Duchenne Muscular Dystrophy. *Respir Med* 2012; 106(2): 276-283.

369. D'Angelo MG, Romei M, Lo Mauro A, Marchi E, Gandossini S, Bonato S, Comi GP, Magri F, Turconi AC, Pedotti A, Bresolin N, Aliverti A. Respiratory pattern in an adult population of dystrophic patients. *J Neurol Sci* 2011; 306(1-2): 54-61.

370. Layton AM, Moran SL, Roychoudhury A, Hupf J, Thomashow BM, Mitsumoto H. Non-invasive measurement of abnormal ventilatory mechanics in amyotrophic lateral sclerosis. *Muscle Nerve* 2016; 54(2): 270-276.

371. LoMauro A, Aliverti A, Mastella C, Arnoldi MT, Banfi P, Baranello G. Spontaneous Breathing Pattern as Respiratory Functional Outcome in Children with Spinal Muscular Atrophy (SMA). *PLoS One* 2016; 11(11): e0165818.

372. Otis AB. Handbook of Physiology. American Physiology Society, Washington, DC, 1964.

373. Aaron EA, Seow KC, Johnson BD, Dempsey JA. Oxygen cost of exercise hyperpnea: implications for performance. *J Appl Physiol* 1992; 72(5): 1818-1825.

374. Nielsen M. Die Respirationsarbeit bei korperruhe und bei musckl arbeit. *Archiv Fur Physiologie* 1936; 74: 299-316.

375. Shephard RJ. The oxygen cost of breathing during vigorous exercise. *QJExpPhysiol Cogn MedSci* 1966; 51(4): 336-350.

376. Ahmaidi S, Comte D, Topin N, Hayot M, Delanaud S, Ramonatxo M, His N, Vardon G, Freville M, Libert J, Prefault C. Reliability of a new device to assess the oxygen consumption of human respiratory muscles. *Medicine and science in sports and exercise* 1999; 31(7): 1076-1082.

377. Katsardis CV, Desmond KJ, Coates AL. Measuring the oxygen cost of breathing in

- normal adults and patients with cystic fibrosis. *Respiratory physiology & neurobiology* 1986: 65(3): 257-266.
378. Whipp BJ, Pardy RL. Breathing During Exercise. *Compr Physiol* 2011: Suppl 12.
379. Dominelli PB, Render JN, Molgat-Seon Y, Foster GE, Sheel AW. Precise mimicking of exercise hyperpnea to investigate the oxygen cost of breathing. *RespirPhysiol Neurobiol* 2014: 201: 15-23.
380. Cooper BG. An update on contraindications for lung function testing. *Thorax* 2011: 66(8): 714-723.
381. Sclauser Pessoa IM, Franco Parreira V, Fregonezi GA, Sheel AW, Chung F, Reid WD. Reference values for maximal inspiratory pressure: a systematic review. *Can Respir J* 2014: 21(1): 43-50.
382. Black LF, Hyatt RE. Maximal respiratory pressures: normal values and relationship to age and sex. *Am Rev Respir Dis* 1969; 99: 696-702.
383. Bruschi C, Cerveri I, Zoia MC, Fanfulla F, Fiorentini M, Casali L, Grassi M, Grassi C. Reference Values of Maximal Respiratory Mouth Pressures - a Population-Based Study. *Am Rev Respir Dis* 1992; 146(3): 790-793.
384. Enright PL, Kronmal RA, Manolio TA, Schenker MB, Hyatt RE. Respiratory Muscle Strength in the Elderly - Correlates and Reference Values. *Am J Resp Crit Care* 1994: 149(2): 430-438.
385. Harik-Khan RI, Wise RA, Fozard JL. Determinants of maximal inspiratory pressure. The Baltimore Longitudinal Study of Aging. *Am J Respir Crit Care Med* 1998; 158(5 Pt 1): 1459-1464.
386. Neder JA, Andreoni S, Lerario MC, Nery LE. Reference values for lung function tests. II.

Maximal respiratory pressures and voluntary ventilation. *Braz J Med Biol Res* 1999; 32(6): 719-727.

387. Evans JA, Whitelaw WA. The Assessment of Maximal Respiratory Mouth Pressures In Adults. *Respiratory care* 2009; 54(10): 1348-1359.

388. Hautmann H, Hefele S, Schotten K, Huber RM. Maximal inspiratory mouth pressures (PIMAX) in healthy subjects--what is the lower limit of normal? *Respir Med* 2000; 94(7): 689-693.

389. Koulouris N, Mulvey DA, Laroche CM, Green M, Moxham J. Comparison of two different mouthpieces for the measurement of Pimax and Pemax in normal and weak subjects. *Eur Respir J* 1988; 1(9): 863-867.

390. Windisch W, Hennings E, Sorichter S, Hamm H, Crie CP. Peak or plateau maximal inspiratory mouth pressure: which is best? *Eur Respir J* 2004; 23(5): 708-713.

391. Wohlgemuth M, van der Kooi EL, Hendriks JC, Padberg GW, Folgering HT. Face mask spirometry and respiratory pressures in normal subjects. *Eur Respir J* 2003; 22(6): 1001-1006.

392. Ringqvist T. The ventilatory capacity in healthy subjects. An analysis of causal factors with special reference to the respiratory forces. *Scand J Clin Lab Invest Suppl* 1966; 88: 5-179.

393. Rochester DF, Arora NS. Respiratory muscle failure. *Med Clin North Am* 1983; 67(3): 573-597.

394. Leech JA, Ghezzi H, Stevens D, Becklake MR. Respiratory Pressures and Function in Young-Adults. *Am Rev Respir Dis* 1983; 128(1): 17-23.

395. Camelo Jr. JS, Terra Filho J, Manco JC. Pressões respiratórias máximas em adultos normais. *Jornal Brasileiro de Pneumologia* 1985; 11(4): 181-184.

396. McElvaney G, Blackie S, Morrison NJ, Wilcox PG, Fairbairn MS, Pardy RL. Maximal



Static Respiratory Pressures in the Normal Elderly. *Am Rev Respir Dis* 1989; 139(1): 277-281.

397. Enright PL, Adams AB, Boyle PJR, Sherrill DL. Spirometry and Maximal Respiratory Pressure References from Healthy Minnesota 65-Year-Old to 85-Year-Old Women and Men. *Chest* 1995; 108(3): 663-669.

398. Johan A, Chan CC, Chia HP, Chan OY, Wang YT. Maximal respiratory pressures in adult Chinese, Malays and Indians. *Eur Respir J* 1997; 10(12): 2825-2828.

399. Pande JN, Verma SK, Singh SP, Guleria R, Khilnani GC. Respiratory pressures in normal Indian subjects. *Indian J Chest Dis Allied Sci* 1998; 40(4): 251-256.

400. Sachs MC, Enright PL, Hinckley Stukovsky KD, Jiang R, Barr RG, Multi-Ethnic Study of Atherosclerosis Lung S. Performance of maximum inspiratory pressure tests and maximum inspiratory pressure reference equations for 4 race/ethnic groups. *Respir Care* 2009; 54(10): 1321-1328.

401. Simões RP, Deus AP, Auad MA, Dionisio J, Mazzonetto M, Borghi-Silva A. Maximal respiratory pressure in healthy 20 to 89 year-old sedentary individuals of central Sao Paulo State. *Rev Bras Fisioter* 2010; 14(1): 60-67.

402. Costa D, Goncalves HA, Lima LP, Ike D, Cancelliero KM, Montebelo MI. New reference values for maximal respiratory pressures in the Brazilian population. *J Bras Pneumol* 2010; 36(3): 306-312.

403. Gopalakrishna A, Vaishali K, Prem V, Aaron P. Normative values for maximal respiratory pressures in an Indian Mangalore population: A cross-sectional pilot study. *Lung India* 2011; 28(4): 247-252.

404. De Troyer A, Leeper JB, McKenzie DK, Gandevia SC. Neural drive to the diaphragm in patients with severe COPD. *Am J Respir Crit Care Med* 1997; 155(4): 1335-1340.

405. Gandevia SC, Leeper JB, McKenzie DK, De Troyer A. Discharge frequencies of parasternal intercostal and scalene motor units during breathing in normal and COPD subjects. *Am J Respir Crit Care Med* 1996; 153(2): 622-628.
406. Gorman RB, McKenzie DK, Butler JE, Tolman JF, Gandevia SC. Diaphragm length and neural drive after lung volume reduction surgery. *Am J Respir Crit Care Med* 2005; 172(10): 1259-1266.
407. De Troyer A, Pêche R, Yernault JC, Estenne M. Neck muscle activity in patients with severe chronic obstructive pulmonary disease. *Am J Respir Crit Care Med* 1994; 150(1): 41-47.
408. Ninane V, Rypens F, Yernault JC, De Troyer A. Abdominal muscle use during breathing in patients with chronic airflow obstruction. *Am Rev Respir Dis* 1992; 146(1): 16-21.
409. Murphy PB, Kumar A, Reilly C, Jolley C, Walterspacher S, Fedele F, Hopkinson NS, Man WD, Polkey MI, Moxham J, Hart N. Neural respiratory drive as a physiological biomarker to monitor change during acute exacerbations of COPD. *Thorax* 2011; 66(7): 602-608.
410. Suh ES, Mandal S, Harding R, Ramsay M, Kamalanathan M, Henderson K, O'Kane K, Douiri A, Hopkinson NS, Polkey MI, Rafferty G, Murphy PB, Moxham J, Hart N. Neural respiratory drive predicts clinical deterioration and safe discharge in exacerbations of COPD. *Thorax* 2015; 70(12): 1123-1130.
411. Steier J, Jolley CJ, Seymour J, Roughton M, Polkey MI, Moxham J. Neural respiratory drive in obesity. *Thorax* 2009; 64(8): 719-725.
412. Steier J, Jolley CJ, Polkey MI, Moxham J. Nocturnal asthma monitoring by chest wall electromyography. *Thorax* 2011; 66(7): 609-614.
413. Reilly CC, Ward K, Jolley CJ, Lunt AC, Steier J, Elston C, Polkey MI, Rafferty GF, Moxham J. Neural respiratory drive, pulmonary mechanics and breathlessness in patients with

cystic fibrosis. *Thorax* 2011; 66(3): 240-246.

414. Steier J, Jolley CJ, Seymour J, Ward K, Luo YM, Polkey MI, Moxham J. Increased load on the respiratory muscles in obstructive sleep apnea. *Respir Physiol Neurobiol* 2010; 171(1): 54-60.

415. He BT, Lu G, Xiao SC, Chen R, Steier J, Moxham J, Polkey MI, Luo YM. Coexistence of OSA may compensate for sleep related reduction in neural respiratory drive in patients with COPD. *Thorax* 2017; 72(3): 256-262.

416. Xiao SC, He BT, Steier J, Moxham J, Polkey MI, Luo YM. Neural Respiratory Drive and Arousal in Patients with Obstructive Sleep Apnea Hypopnea. *Sleep* 2015; 38(6): 941-949.

417. Qin YY, Steier J, Jolley C, Moxham J, Zhong NS, Luo YM. Efficiency of neural drive during exercise in patients with COPD and healthy subjects. *Chest* 2010; 138(6): 1309-1315.

418. Luo YM, Li RF, Jolley C, Wu HD, Steier J, Moxham J, Zhong NS. Neural respiratory drive in patients with COPD during exercise tests. *Respiration* 2011; 81(4): 294-301.

419. Guenette JA, Chin RC, Cheng S, Dominelli PB, Raghavan N, Webb KA, Neder JA, O'Donnell DE. Mechanisms of exercise intolerance in global initiative for chronic obstructive lung disease grade 1 COPD. *The European respiratory journal* 2014; 44(5): 1177-1187.

420. Jolley C, Luo Y, Steier J, Sylvester K, Man W, Rafferty G, Polkey M, Moxham J. Neural respiratory drive and symptoms that limit exercise in chronic obstructive pulmonary disease. *Lancet* 2015; 385 Suppl 1: S51.

421. Jolley CJ, Luo YM, Steier J, Rafferty GF, Polkey MI, Moxham J. Neural respiratory drive and breathlessness in COPD. *The European respiratory journal* 2015; 45(2): 355-364.

422. Qin YY, Li RF, Wu GF, Zhu Z, Liu J, Zhou CZ, Guan WJ, Luo JY, Yu XX, Ou YM, Jiang M, Zhong NS, Luo YM. Effect of tiotropium on neural respiratory drive during exercise in

severe COPD. *Pulmonary pharmacology & therapeutics* 2015; 30: 51-56.

423. Qiu ZH, Guo HX, Lu G, Zhang N, He BT, Zhou L, Luo YM, Polkey MI. Physiological responses to Tai Chi in stable patients with COPD. *Respir Physiol Neurobiol* 2016; 221: 30-34.

424. Elbehairy AF, Guenette JA, Faisal A, Ciavaglia CE, Webb KA, Jensen D, Ramscook AH, Neder JA, O'Donnell DE, Canadian Respiratory Research N. Mechanisms of exertional dyspnoea in symptomatic smokers without COPD. *The European respiratory journal* 2016; 48(3): 694-705.

425. Smith L, Reilly CC, MacBean V, Jolley CJ, Elston C, Moxham J, Rafferty GF. Physiological markers of exercise capacity and lung disease severity in cystic fibrosis. *Respirology* 2017; 22(4): 714-720.

426. Ciavaglia CE, Guenette JA, Langer D, Webb KA, Alberto Neder J, O'Donnell DE. Differences in respiratory muscle activity during cycling and walking do not influence dyspnea perception in obese patients with COPD. *Journal of applied physiology* 2014; 117(11): 1292-1301.

427. Keel JC, Smith MJ, Wassermann EM. A safety screening questionnaire for transcranial magnetic stimulation. *Clin Neurophysiol* 2001; 112(4): 720.

428. Demoule A, Verin E, Ross E, Moxham J, Derenne JP, Polkey MI, Similowski T. Intracortical inhibition and facilitation of the response of the diaphragm to transcranial magnetic stimulation. *J Clin Neurophysiol* 2003; 20(1): 59-64.

429. Wang W, Similowski T, Series F. Interaction between genioglossus and diaphragm responses to transcranial magnetic stimulation in awake humans. *Exp Physiol* 2007; 92(4): 739-747.

430. Series F, Wang W, Melot C, Similowski T. Concomitant responses of upper airway

stabilizing muscles to transcranial magnetic stimulation in normal men. *Exp Physiol* 2008; 93(4): 496-502.

431. Hopkinson NS, Sharshar T, Ross ET, Nickol AH, Dayer MJ, Porcher R, Jonville S, Moxham J, Polkey MI. Corticospinal control of respiratory muscles in chronic obstructive pulmonary disease. *Respir Physiol Neurobiol* 2004; 141(1): 1-12.

432. Duguet A, Demoule A, Gonzalez J, Remy-Neris O, Derenne JP, Similowski T. Predicting the recovery of ventilatory activity in central respiratory paralysis. *Neurology* 2006; 67(2): 288-292.

433. Fauroux B, Quijano-Roy S, Desguerre I, Khirani S. The value of respiratory muscle testing in children with neuromuscular disease. *Chest* 2015; 147(2): 552-559.

434. Verges S, Boutellier U, Spengler CM. Effect of respiratory muscle endurance training on respiratory sensations, respiratory control and exercise performance: a 15-year experience. *Respiratory physiology & neurobiology* 2008; 161(1): 16-22.

435. Killian KJ, Jones NL. Respiratory muscles and dyspnea. *Clin Chest Med* 1988; 9: 237-248.

**Table S1.** Summary of relative contraindications and the main reasons to avoid respiratory muscle testing

| Contraindication                                                  | Reason to avoid respiratory muscle testing                         |
|-------------------------------------------------------------------|--------------------------------------------------------------------|
| Recent surgery (thoracic / abdominal / brain / ear, nose, throat) | Rupture site of injury, avoid pain, discomfort                     |
| Pneumothorax                                                      | Worsen pneumothorax, avoid discomfort and pain                     |
| Myocardial infarction                                             | Induce further infarction leading to cardiac arrest                |
| Ascending aortic aneurysm                                         | Rupture of aneurysm, catastrophic/fatal event                      |
| Haemoptysis                                                       | Pulmonary emboli or myocardial infarction                          |
| Pulmonary embolism                                                | Death, hypoxia leading to respiratory failure                      |
| Acute diarrhoea / stress incontinence                             | Discomfort, embarrassment, infection risk                          |
| Severe hypertension (systolic >200 mmHg, diastolic >120 mmHg)     | Risk of blackout/collapse, rupture of cerebral blood vessels, etc. |
| Confused/demented patients                                        | Tests are volitional and need full patient cooperation             |
| Patient discomfort                                                | Vomiting, diarrhoea, cold sores, common cold                       |
| Infection control issue                                           | Contagious infections (norovirus, tuberculosis, flu)               |
| Based on Cooper [380]                                             |                                                                    |

**Table S2.** Reference values for maximal inspiratory pressure (PImax) measurements performed at residual volume

| Reference                     | Study population                                                                                                                                                                                                  | Reference values (equation), cmH <sub>2</sub> O                                                                         | LLN (Lower Limit Normality), cmH <sub>2</sub> O                                     |
|-------------------------------|-------------------------------------------------------------------------------------------------------------------------------------------------------------------------------------------------------------------|-------------------------------------------------------------------------------------------------------------------------|-------------------------------------------------------------------------------------|
| Sclausser Pessoa et al. [381] | Based on 22 studies (n=840; 426 men, 414 women see Tables S7 and S8 for details) that measured PImax in accordance with 2002 ATS/ERS statement [19] (either flanged or tube mouthpiece)                           | See table S3                                                                                                            | -                                                                                   |
| Rodrigues et al. [22]         | Based on 6 most cited publications of reference values for PImax [32, 381-385]. 3 references providing higher normal values are recommended [381, 382, 385] (see below for details of three recommended studies). |                                                                                                                         | See table S4                                                                        |
| Bruschi et al. [383]          | n=669 subjects (290 male / 379 female) from 18-70 years.                                                                                                                                                          | $\text{LnPImax} = 4.02 - (0.26 \times \text{sex}) - (0.004 \times \text{age}) + (0.47 \times \text{body surface area})$ |                                                                                     |
| Neder et al. [386]            | n=100 subjects (50 male / 50 female) from 20 to 80 years.                                                                                                                                                         | Male = $155 - (0.8 \times \text{age})$<br>Female = $110 - (0.49 \times \text{age})$                                     |                                                                                     |
| Black and Hyatt. [382]        | n=120 subjects, (60 male / 60 female) from 20 to 74 years.                                                                                                                                                        | Male = $143 - (0.55 \times \text{age})$<br>Female = $104 - (0.51 \times \text{age})$                                    |                                                                                     |
| Evans et al. [387]            | Based on 5 studies [383, 387-390] using 2002 ATS/ERS statement [19] and flanged mouthpiece                                                                                                                        | Male = $120 - (0.41 \times \text{age})$<br>Female = $108 - (0.61 \times \text{age})$                                    | Male = $62 - (0.15 \times \text{age})$<br>Females = $62 - (0.50 \times \text{age})$ |

**Table S3.** Reference values for maximal inspiratory pressure (PImax) measurements obtained at residual volume for different age groups

| Age group, years | Men                       |                                          | Women                     |                                          |
|------------------|---------------------------|------------------------------------------|---------------------------|------------------------------------------|
|                  | Studies, n/sample size, n | PImax, cmH <sub>2</sub> O, mean (95% CI) | Studies, n/sample size, n | PImax, cmH <sub>2</sub> O, mean (95% CI) |
| 18–29            | 6/96                      | 128.0 (116.3–139.5)                      | 6/92                      | 97.0 (88.6–105.4)                        |
| 30–39            | 6/69                      | 128.5 (118.3–138.7)                      | 6/66                      | 89.0 (84.5–93.5)                         |
| 40–49            | 6/72                      | 117.1 (104.9–129.2)                      | 6/71                      | 92.9 (78.4–107.4)                        |
| 50–59            | 5/61                      | 108.1 (98.7–117.6)                       | 5/60                      | 79.7 (74.9–84.9)                         |
| 60–69            | 5/65                      | 92.7 (84.6–100.8)                        | 5/66                      | 75.1 (67.3–82.9)                         |
| 70–83            | 5/63                      | 76.2 (66.1–86.4)                         | 5/59                      | 65.3 (57.8–72.7)                         |

From Schlauser Pessoa et al. [381]



**Table S4.** Absolute maximal inspiratory pressure (PImax) values obtained at residual volume associated with “higher” likelihood of inspiratory muscle weakness, by sex and age

| Age (yrs) | PImax (cmH <sub>2</sub> O) |                    |
|-----------|----------------------------|--------------------|
|           | Men <sup>*</sup>           | Women <sup>+</sup> |
| < 40      | 63                         | 58                 |
| 40-60     | 55                         | 50                 |
| 61-80     | 47                         | 43                 |
| > 80      | 42                         | 38                 |

<sup>\*</sup> n = 164 (< 40 y), 302 (40-60 y), 365 (61-80 y), and 35 (> 80 y). <sup>+</sup> n = 140 (< 40 y), 293 (40-60 y), 387 (61-80 y), and 43 (> 80 y). From Rodrigues et al. [22]

**Table S5.** Reference values for maximal expiratory pressure (PE<sub>max</sub>) measurements performed at total lung capacity

| Reference              | Study population                                                                                | Reference values (equation), cmH <sub>2</sub> O                                                                                   | LLN (Lower Limit Normality), cmH <sub>2</sub> O                                      |
|------------------------|-------------------------------------------------------------------------------------------------|-----------------------------------------------------------------------------------------------------------------------------------|--------------------------------------------------------------------------------------|
| Evans et al. [387]     | Based on 4 studies [32, 203, 383, 385] using 2002 ATS/ERS statement [19] and flanged mouthpiece | Male = $174 - (0.83 \times \text{age})$<br>Female = $131 - (0.86 \times \text{age})$                                              | Male = $117 - (0.83 \times \text{age})$<br>Females = $95 - (0.57 \times \text{age})$ |
| Neder et al. [386]     | n=100 subjects (50 male / 50 female) from 20 to 80 years. Flanged mouthpiece.                   | Male = $165 - (0.81 \times \text{age})$<br>Female = $115 - (0.61 \times \text{age})$                                              |                                                                                      |
| Black and Hyatt. [382] | n=120 subjects, (60 male / 60 female) from 20 to 74 years. Tube mouthpiece.                     | Male = $268 - (1.03 \times \text{age})$<br>Female = $170 - (0.53 \times \text{age})$                                              |                                                                                      |
| Bruschi et al. [383]   | n=669 subjects (290 male / 379 female) from 18-70 years. Tube mouthpiece.                       | $\text{LnPE}_{\text{max}} = 4.54 - (0.35 \times \text{sex}) - (0.003 \times \text{age}) + (0.24 \times \text{body surface area})$ |                                                                                      |

**Table S6.** Reference normal ranges for maximal expiratory pressure (PEmax) measurements performed at total lung capacity

| Reference                 | Numbers |        | PEmax (cmH <sub>2</sub> O) |          | Mouthpiece |
|---------------------------|---------|--------|----------------------------|----------|------------|
|                           | Male    | Female | Male                       | Female   |            |
| Ringqvist et al. [392]    | 106     | 94     | 239 ± 46                   | 164 ± 30 | Tube       |
| Black and Hyatt [382]     | 60      | 60     | 233 ± 42                   | 149 ± 27 | Tube       |
| Rochester and Arora [393] | 80      | 121    | 215 ± 45                   | 138 ± 68 | Tube       |
| Bruschi et al. [383]      | 290     | 379    | 140 ± 30                   | 96 ± 20  | Tube       |
| Enright et al. [384]      | 244     | 292    | 175 ± 46                   | 118 ± 37 | Flanged    |
| Leech et al. [394]        | 325     | 50     | 154 ± 82                   | 94 ± 33  | Flanged    |
| Wilson et al. [32]        | 80      | 480    | 147 ± 34                   | 93 ± 17  | Flanged    |
| Neder et al. [386]        | 50      | 87     | 141 ± 22                   | 100 ± 11 | Flanged    |
| Vincken et al. [202]      | 46      | 60     | 140 ± 38                   | 89 ± 24  | Flanged    |

Table adapted from previous 2002 ATS/ERS statement [19] adding data from studies included in review from Evans et al. [387]

**Table S7.** Characteristics of participants from studies included in the review from Sclauser Pessoa et al. (PI<sub>max</sub> n=22; PE<sub>max</sub> n=17) [380]

| Reference                               | Pressures                               | Age, years (range) | Height, cm (mean±SD)                              | Weight, kg (mean±SD)       |
|-----------------------------------------|-----------------------------------------|--------------------|---------------------------------------------------|----------------------------|
| Cook et al., [33]; n=32 (23M/9F)        | PI <sub>max</sub> and PE <sub>max</sub> | M: 18–64; F: 18–32 | M: 179; F: 164                                    | NR                         |
| Ringqvist et al. [392]; n=200           | PI <sub>max</sub> and PE <sub>max</sub> | 18–83              | Reported according to age                         | Reported according to age  |
| Black and Hyatt [382]; n=120,           | PI <sub>max</sub> and PE <sub>max</sub> | 20–74              | NR                                                | NR                         |
| Leech et al. [394]; n=595 (252M/343F)   | PI <sub>max</sub> and PE <sub>max</sub> | 15–35              | Reported according to age                         | Reported according to age  |
| Wilson et al. [32]; n=135 (48M/87F)     | PI <sub>max</sub> and PE <sub>max</sub> | 18–49 >50          | M: 179±6; F: 163±7                                | M: 74.5±8.5; F: 61.4±9     |
| Camelo et al. [395]; n=60 (30M/30F)     | PI <sub>max</sub> and PE <sub>max</sub> | 20–49              | M: 170±7.7; F: 160.2±6.2                          | M: 70.0±10.8; F: 56.0±9.1  |
| Vincken et al. [202]; n=106 (46M/60F)   | PI <sub>max</sub> and PE <sub>max</sub> | 16–79              | M: 172±7; F: 160±7                                | M: 74±9; F: 59±10.0        |
| McElvaney et al. [396]; n=104           | PI <sub>max</sub> and PE <sub>max</sub> | >55                | M: 174±7; F: 161±6                                | M: 107±10; F: 112±12       |
| Bruschi et al. [383]; n=669             | PI <sub>max</sub> and PE <sub>max</sub> | 18–70              | NR                                                | NR                         |
| Enright et al. [384]; n=2871            | PI <sub>max</sub> and PE <sub>max</sub> | >65                | M: 173.2±6.59; F: 158.8±6.30                      | M: 79.5±11.6; F: 66.2±12.5 |
| Enright et al. [397]; n=228 (112M/176F) | PI <sub>max</sub> and PE <sub>max</sub> | >65                | M: 171.25; F: 157                                 | M: 79.7; F: 65.7           |
| Johan et al. [398]; n=452 (277M/175F)   | PI <sub>max</sub> and PE <sub>max</sub> | 20–80              | M: 164–167 <sup>*</sup> ; F: 155–157 <sup>*</sup> | M: 64.1–67.21; F: 53.6–    |
| Pande et al. [399]; n=273 (153M/120F)   | PI <sub>max</sub>                       | 20–65              | M: 165.6±6.1; F: 153.5±5.2                        | M: 62.5±11.7; F: 57.5±10.9 |
| Harik-Khan et al. [385]; n=267          | PI <sub>max</sub>                       | <40 – >75          | M: 164.2±7.3; F: 177.6±6.6                        | M: 64.7±11.9; F: 81.7±13.3 |
| Neder et al. [386]; n=100 (50M/50F)     | PI <sub>max</sub> and PE <sub>max</sub> | 20–80              | M: 168.4±6.2; F: 157.1±7.1                        | M: 73.8±10.7; F: 62.5±10.8 |
| Hautmann et al. [388]; n=504            | PI <sub>max</sub>                       | 18–82              | M: 176.9±6.82; F: 164.9±6.37                      | M: 78.3±10.9; F: 66.4±10.8 |
| Wohlgemuth et al. [391]; n=252          | PI <sub>max</sub> and PE <sub>max</sub> | 18–80              | Reported according to age                         | Reported according to age  |
| Windisch et al. [390]; n=490            | PI <sub>max</sub>                       | 10–90              | M: 179.5±7.7; F: 166.4±7.0                        | M: 77.9±11.2; F: 66.0±10.9 |
| Sachs et al. [400]; n=1755              | PI <sub>max</sub>                       | 45–84              | M: 172; F: 158                                    | M: 80.45; F: 68.18         |
| Simões et al. [401]; n=140 (70M/70F)    | PI <sub>max</sub> and PE <sub>max</sub> | 20–89              | Reported according to age                         | Reported according to age  |
| Costa et al. [402]; n=120 (60M/60F)     | PI <sub>max</sub> and PE <sub>max</sub> | 20–80              | Reported according to age                         | Reported according to age  |
| Gopalakrishna et al. [403]; n=250       | PI <sub>max</sub> and PE <sub>max</sub> | 20–70              | M: 165.70±7.56; F: 155.99±5.81                    | M: 64.62±9.73; F:          |

NR, not reported; M, male; F, female

**Table S8.** Technical aspects in 22 studies that influence maximal respiratory pressures (P<sub>I</sub>max (n=22) from residual volume and P<sub>E</sub>max (n=17) from total lung capacity) [380]

| Reference                  | Mouthpiece | Small leak (size) | Pressure evaluated                                  | Time of P <sub>I</sub> max | Trials, n | Criterion for stopping                  |
|----------------------------|------------|-------------------|-----------------------------------------------------|----------------------------|-----------|-----------------------------------------|
| Cook et al. [33]           | Tube       | NR                | Peak (P <sub>I</sub> max and P <sub>E</sub> max)    | Without control            | Min of 2  | NR                                      |
| Ringqvist et al. [392]     | Tube       | Yes (2 mm)        | Peak (P <sub>I</sub> max and P <sub>E</sub> max)    | Max 1.5 s                  | Min of 5  | Highest value                           |
| Black and Hyatt [382]      | Tube       | Yes (2 mm)        | Peak (P <sub>I</sub> max and P <sub>E</sub> max)    | Min of 1 s                 | Min of 2  | Highest value                           |
| Leech et al. [394]         | NR         | Yes (0.90 mm)     | Peak (P <sub>I</sub> max and P <sub>E</sub> max)    | NR                         | Max of 3  | Highest value                           |
| Wilson et al. [32]         | Flanged    | Yes, size NR      | Peak (P <sub>I</sub> max and P <sub>E</sub> max)    | Min of 1 s                 | Min of 3  | 2 identical readings                    |
| Camelo et al. [395]        | Tube       | Yes (2 mm)        | Peak (P <sub>I</sub> max and P <sub>E</sub> max)    | Min of 1 s                 | Min of 4  | Highest value                           |
| Vincken et al. [202]       | Flanged    | Yes (1.27 mm)     | Plateau (P <sub>I</sub> max and P <sub>E</sub> max) | Min of 1 s                 | Min of 4  | Highest 2 values within 5% difference   |
| McElvaney et al. [396]     | Tube       | Yes (0.6 mm)      | Peak (P <sub>I</sub> max and P <sub>E</sub> max)    | Min of 1s                  | Min of 3  | Highest 3 values within 5% difference   |
| Bruschi et al. [383]       | Tube       | Yes (1.06 mm)     | Peak (P <sub>I</sub> max and P <sub>E</sub> max)    | Min of 1 s                 | Min of 5  | Highest value                           |
| Enright et al. [384]       | Tube       | Yes (1 mm)        | Peak (P <sub>I</sub> max and P <sub>E</sub> max)    | 2 s                        | 3–5       | Highest 2 values within 10% difference  |
| Enright et al. [397]       | Tube       | Yes (1 mm)        | Peak (P <sub>I</sub> max and P <sub>E</sub> max)    | 2 s                        | 5         | Highest 2 values within 10% difference  |
| Johan et al. [398]         | Flanged    | Yes, size NR      | Peak (P <sub>I</sub> max and P <sub>E</sub> max)    | Min of 1 s                 | 3–5       | Highest value of 3 similar trials       |
| Pande et al. [399]         | NR         | Yes (1.27 mm)     | Peak (P <sub>I</sub> max)                           | Min of 2 s                 | NR        | Highest value                           |
| Harik-Khan et al. [385]    | Tube       | Yes (1 mm)        | Peak (P <sub>I</sub> max)                           | 2 s                        | Max of 5  | Highest 2 values within 10% difference  |
| Neder et al. [386]         | Flanged    | Yes, size NR      | Peak (P <sub>I</sub> max and P <sub>E</sub> max)    | Min of 1 s                 | 3–5       | Highest value. <10% of 3 trials         |
| Hautmann et al. [388]      | NR         | Yes, size NR      | Plateau (P <sub>I</sub> max)                        | Min of 2 s                 | Min of 7  | Highest value                           |
| Wohlgemuth et al. [391]    | Face mask  | Yes (2 mm)        | Peak (P <sub>I</sub> max and P <sub>E</sub> max)    | Min of 1 s                 | Min of 3  | Highest value varying 5%                |
| Windisch et al. [390]      | Flanged    | Yes (2 mm)        | Peak and plateau (P <sub>I</sub> max)               | Min of 1 s                 | Min of 7  | Highest 2 values within 10% difference  |
| Sachs et al. [400]         | Tube       | NR                | Plateau (P <sub>I</sub> max)                        | Min of 1 s                 | 5         | Highest 2 values within 10% difference  |
| Simões et al. [401]        | Tube       | Yes (2 mm)        | Plateau (P <sub>I</sub> max and P <sub>E</sub> max) | About 1 s                  | Min of 3  | Highest value <10% of all trials        |
| Costa et al. [402]         | NR         | Yes (2 mm)        | Peak (P <sub>I</sub> max and P <sub>E</sub> max)    | Min of 1 s                 | Min of 3  | Highest value <10% of 2 trials          |
| Gopalakrishna et al. [403] | NR         | NR                | Peak (P <sub>I</sub> max and P <sub>E</sub> max)    | Min of 1 s                 | Min of 3  | Highest 2 values within <10% difference |

NR, nor reported

**Table S9.** Reference values maximal sniff nasal inspiratory pressure (SNIP)

| Reference                                                                                                  | Study population                                 | Reference values (equation),<br>cmH <sub>2</sub> O                                                                         | LLN (Lower Limit<br>Normality), cmH <sub>2</sub> O                                                                                       | Mean LLN, cmH <sub>2</sub> O                                                 |
|------------------------------------------------------------------------------------------------------------|--------------------------------------------------|----------------------------------------------------------------------------------------------------------------------------|------------------------------------------------------------------------------------------------------------------------------------------|------------------------------------------------------------------------------|
| Araujo et al. [54]<br>Reference values for SNIP<br>in healthy subjects in Brazil<br>– multicentre study.   | 243 healthy individuals<br>(20-80 years), Brazil | (Males) SNIP= $-0.47(\text{age}) + 135.6$<br>(Females) SNIP = $-0.36(\text{age}) + 110.1$                                  | (Males) = $-0.47(\text{age}) + 135.6 - 44.9$<br>(Females) = $-0.36(\text{age}) + 110.1 - 30.5$                                           | (males) = 69.2<br>(females) = 61.9                                           |
| Kamide et al. [55] SNIP in<br>healthy Japanese subjects:<br>mean values and LLN.                           | 223 healthy Japanese<br>(20-70y)                 | (males) SNIP = $-0.67(\text{age}) + 104.65$<br>(females) SNIP = $2.31(\text{BMI}) + 10.26$                                 | (males) LLN = $-0.67(\text{age}) + 104.65 - 43.78$<br>(females) LLN = $2.31(\text{BMI}) + 10.26 - 31.32$                                 | (males) = 32.9<br>(females) = 28.8                                           |
| Uldry and Fitting [66]<br>Maximal values of sniff<br>nasal inspiratory pressure<br>in healthy subjects.    | 168 healthy subjects (20-<br>80 y), Europe       | (males) SNIP = $-0.42(\text{age}) + 126.8$<br>(females) SNIP = $-0.22(\text{age}) + 94.9$                                  | (males) LLN = $-0.42(\text{age}) + 126.8 - 39.0$<br>(females) LLN = $-0.22(\text{age}) + 94.9 - 28.0$                                    |                                                                              |
| Huang et al. [65] SNIP<br>does not decrease in<br>elderly subjects.                                        | 119 healthy volunteers<br>(18-69y), Taiwan       | (males) SNIP = $21.10 + 1.24(\text{body weight})$<br>(females) SNIP = $19.44 + 5.65(\text{BMI}) - 2.06(\text{Body Fat}\%)$ | (males) LLN = $21.10 + 1.24(\text{body weight}) - 50.16$<br>(females) LLN = $19.44 + 5.65(\text{BMI}) - 2.06(\text{Body Fat}\%) - 33.81$ | (males) 60.33<br>cmH <sub>2</sub> O<br>(females) 52.05<br>cmH <sub>2</sub> O |
| Stefanutti et al. [67] Sniff<br>Nasal inspiratory pressure<br>- Reference values in<br>Caucasian Children. | 180 healthy children (6-<br>17y), Europe         | (Boys) SNIP = $3.3(\text{age}) + 70$<br>(Girls) $93 \pm 23\text{cmH}_2\text{O}$                                            | (Boys) SNIP = $3.3(\text{age}) + 70 - 39.8\text{ cmH}_2\text{O}$<br>(Girls) SNIP = $93 \pm 23\text{ cmH}_2\text{O}$                      |                                                                              |

**Table S10.** Summary of prognostics, discriminative, clinical meaningful difference and evaluative information of endorsed EMG techniques at rest in cardiorespiratory disease.

| Disease | Variable                  | Reference                                       | Subject Characteristics                 | Protocol          | Prognostic information                                                         | Discriminative | Minimal clinically important difference                                                                 | Evaluative: pharmacological interventions | Evaluative: non-pharmacological interventions                                     | Cautions |
|---------|---------------------------|-------------------------------------------------|-----------------------------------------|-------------------|--------------------------------------------------------------------------------|----------------|---------------------------------------------------------------------------------------------------------|-------------------------------------------|-----------------------------------------------------------------------------------|----------|
| COPD    | SMUdi<br>SMUpa<br>SMUscal | De Troyer et al. [404]<br>Gandevia et al. [405] | Severe COPD patients<br>Vs.<br>Controls | Resting breathing |                                                                                |                | ↑ peak discharge rate. In COPD, 79% of SMUdi discharged at >15Hz compared to < 5% of SMUdi for controls |                                           | Elevated discharge rate of di SMUs 'recovers' towards normal following LVRS [406] |          |
| COPD    | iEMGscal<br>iEMGscm       | De Troyer et al. [407]                          | Severe COPD                             | Resting breathing |                                                                                |                | Strong insp activity in scal, but minimal in SCM                                                        |                                           |                                                                                   |          |
| COPD    | iEMGabdo                  | Ninane et al. [408]                             | COPD<br>Vs.<br>Controls                 | Resting breathing | Degree of activity related to airflow obstruction (i.e. FEV1)                  |                | Exp activity in TA in COPD but not controls                                                             |                                           |                                                                                   |          |
| COPD    | oesEMGdi %max             | Jolley et al. [304]                             | COPD<br>Vs<br>Controls                  | Resting breathing | Degree of activity related to airflow obstruction (i.e. FEV1 %pred, VC and IC) |                | ↑EMGdi % max in COPD                                                                                    |                                           |                                                                                   |          |
| COPD    | sEMGpara%                 | Murphy et                                       | COPD                                    | Resting           |                                                                                | Discriminated  |                                                                                                         |                                           |                                                                                   |          |

|                |                                       |                                  |                                                                                     |                                                  |                                                                                                                                          |                                                                                                                                                  |                                                                                       |                      |
|----------------|---------------------------------------|----------------------------------|-------------------------------------------------------------------------------------|--------------------------------------------------|------------------------------------------------------------------------------------------------------------------------------------------|--------------------------------------------------------------------------------------------------------------------------------------------------|---------------------------------------------------------------------------------------|----------------------|
|                | max                                   | al. [409]<br>Suh et al.<br>[410] |                                                                                     | breathing                                        |                                                                                                                                          | between<br>patients who<br>deteriorated or<br>improved.<br>Discriminated<br>between<br>patients who<br>were readmitted<br>to hospital or<br>not. |                                                                                       |                      |
| <b>Obesity</b> | oesEMGdi<br>%max                      | Steier et<br>al. [411]           | Obese subjects<br>Versus<br>Controls                                                | Resting<br>breathing in<br>different<br>postures | Degree of<br>muscle activity<br>thought to be<br>related to PEEPi<br>as PEEPi and<br>EMGdi %max ↓<br>with CPAP                           |                                                                                                                                                  | ↑EMGdi % max<br>in obese,<br>worsened by<br>supine posture<br>(cf seated)             |                      |
| <b>Asthma</b>  | sEMGpara<br>% max                     | Steier et<br>al. [412]           | Controlled<br>asthmatics<br>Versus<br>Uncontrolled<br>asthmatics<br>Versus Controls | Resting<br>breathing,<br>awake and<br>asleep     | Low predictive<br>value for AHI in<br>sleep                                                                                              | ↑EMGpara<br>%max in<br>uncontrolled<br>asthma cf to<br>controlled<br>asthma.                                                                     | ↑EMGpara %<br>max in<br>wakefulness<br>and sleep and<br>more variable cf<br>controls. |                      |
| <b>CF</b>      | sEMGpara<br>% max<br>oesEMGdi<br>%max | Reilly et al.<br>[413]           | Cystic Fibrosis<br>Versus Controls                                                  | Resting<br>breathing<br>(and<br>exercise)        | sEMGpara<br>%max and<br>oesEMGdi<br>%max related to<br>degree of airway<br>obstruction,<br>hyperinflation,<br>dynamic lung<br>compliance |                                                                                                                                                  | ↑sEMGpara%<br>max and<br>↑oesEMG%<br>max cf to<br>controls                            |                      |
| <b>OSA</b>     | oesEMGdi<br>%max                      | Steier et<br>al. [414]           | OSA versus<br>Controls                                                              | Resting<br>breathing                             |                                                                                                                                          |                                                                                                                                                  | ↑oesEMGdi %<br>max cf to                                                              | Effect<br>may be, in |



|            |                  |                        |                                                   |                                                     |  |                                                                                                                                                    |                               |
|------------|------------------|------------------------|---------------------------------------------------|-----------------------------------------------------|--|----------------------------------------------------------------------------------------------------------------------------------------------------|-------------------------------|
|            |                  | He et al.<br>[415]     |                                                   | during sleep                                        |  | controls                                                                                                                                           | part, due<br>to ↑BMI<br>[410] |
| <b>OSA</b> | oesEMGdi<br>%max | Xiao et al.<br>[416]   | OSA                                               | Hypopnoeic<br>and apnoeic<br>events<br>during sleep |  | No different in<br>oesEMGdi %<br>max for events<br>with and without<br>aroudal.<br>↑oesEMGdi %<br>max at end of<br>hyponoeic cf<br>apnoeic events. |                               |
| <b>ILD</b> | oesEMGdi<br>%max | Faisal et<br>al. [156] | Mild-mod ILD<br>versus COPD<br>versus<br>Controls | Resting<br>breathing                                |  | ↑oesEMGdi %<br>max in ILD and<br>COPD cf to<br>controls                                                                                            |                               |

---

COPD: chronic obstructive pulmonary disease; SMUs: single motor units; di: diaphragm; Para: parasternal intercostal muscles in the second space; Scal: scalene; SCM: sternocleidomastoid muscle; i: intramuscular; EMG: electromyography; multi: multiunit recordings; Abdo: abdominal muscles; LVRS: lung volume reduction surgery; inspiratory: inspiratory; exp: expiratory; TA: transversus abdominis; CPAP: continuous positive airway pressure; OSA: obstructive sleep apnoea; ILD: interstitial lung disease; oes: oesophageal; max: maximal.

**Table S11.** Prognostics, discriminative, clinical meaningful difference and evaluative information of EMG techniques tested during exercise in cardiorespiratory disease.

| Disease | Variable      | Reference             | Subject Characteristics    | Exercise protocol(s)                  | Prognostic information                          | Discriminative                                                                     | Minimal clinically important difference        | Evaluative: pharmacological interventions | Evaluative: non-pharmacological interventions | Cautions |
|---------|---------------|-----------------------|----------------------------|---------------------------------------|-------------------------------------------------|------------------------------------------------------------------------------------|------------------------------------------------|-------------------------------------------|-----------------------------------------------|----------|
| COPD    | oesEMGdi      | Qin et al. [417]      | Severe COPD versus control | Constant load treadmill               |                                                 |                                                                                    |                                                |                                           |                                               |          |
| COPD    | oesEMGdi      | Luo et al. [418]      | Mod-severe COPD            | Constant versus incremental treadmill |                                                 |                                                                                    | EMGdi similar at end of both types of exercise |                                           |                                               |          |
| COPD    | oesEMGdi %max | Guenette et al. [419] | Mild COPD versus Controls  | Incremental cycle                     |                                                 |                                                                                    | ↑EMGdi % max in COPD cf controls               |                                           |                                               |          |
| COPD    | oesEMGdi %max | Jolley et al. [420]   |                            | Cycle to exhaustion                   |                                                 | ↑EMGdi in those patients who stopped because of breathlessness and not leg fatigue |                                                |                                           |                                               |          |
| COPD    | oesEMGdi %max | Jolley et al. [421]   | Severe COPD patients       | Incremental cycle and treadmill       | Exertional breathlessness related to EMGdi %max |                                                                                    | EMGdi % max related to breathlessness          |                                           |                                               |          |

|                                  |                                   |                           |                                                                                    |                                                           |                                                                                                                   |                                                                                                                                                     |
|----------------------------------|-----------------------------------|---------------------------|------------------------------------------------------------------------------------|-----------------------------------------------------------|-------------------------------------------------------------------------------------------------------------------|-----------------------------------------------------------------------------------------------------------------------------------------------------|
| <b>COPD</b>                      | oesEMGdi<br>%max                  | Qin et al.<br>[422]       | Severe COPD<br>+/- inhaled<br>tiotropium<br>(muscarinic<br>receptor<br>antagonist) | Constant<br>cycle                                         |                                                                                                                   | ↓EMGdi at rest with<br>tiotropium, improved<br>'efficiency' of neural<br>respiratory drive during<br>exercise and<br>prolonged exercise<br>duration |
| <b>COPD</b>                      | oesEMGdi<br>%max                  | Qiu et al.<br>[423]       | COPD (range of<br>severities)                                                      | Constant<br>rate<br>treadmill<br>versus Tai<br>Chi        | Similar EMGdi in<br>both forms of<br>exercise                                                                     |                                                                                                                                                     |
| <b>ILD/COPD</b>                  | oesEMGdi<br>%max                  | Faisal et<br>al. [154]    | Mild-mod ILD<br>versus COPD<br>versus<br>Controls                                  | Incremental<br>cycle                                      | Similar ↑EMGdi in<br>ILD and COPD at<br>rest and during<br>exercise of<br>controls                                |                                                                                                                                                     |
| <b>Non-<br/>COPD<br/>smokers</b> | oesEMGdi<br>%max                  | Elbehairy<br>et al. [424] | Smokers (normal<br>lung function)<br>Versus Controls                               | Incremental<br>cycle                                      | ↑EMGdi % max of<br>controls, mainly<br>due to lower<br>EMGdimax in<br>smokers                                     |                                                                                                                                                     |
| <b>CF</b>                        | sPara %<br>max                    | Smith et<br>al. [425]     | Cystic Fibrosis<br>Versus Controls                                                 | Incremental<br>shuttle walk<br>test                       | sEMGpara%max<br>related to exercise<br>performance (VO2<br>peak), but not as<br>strongly as lung<br>gas transfer. |                                                                                                                                                     |
| <b>CF</b>                        | sPara<br>%max<br>oesEMGdi<br>%max | Reilly et al.<br>[413]    | Cystic Fibrosis<br>Versus Controls                                                 | Incremental<br>cycle<br>exercise<br>test to<br>exhaustion | sEMGpara %max<br>and oesEMGdi<br>%max related to<br>breathlessness                                                |                                                                                                                                                     |

|                         |                  |                           |                             |                                             |                                                                                                        |
|-------------------------|------------------|---------------------------|-----------------------------|---------------------------------------------|--------------------------------------------------------------------------------------------------------|
| <b>Obesity<br/>COPD</b> | oesEMGdi<br>%max | Ciavaglia<br>et al. [426] | Obese with<br>moderate COPD | Incremental<br>cycle<br>Versus<br>treadmill | Similar oesEMGdi<br>%max in 2<br>exercise types,<br>but resulted in<br>different transdi<br>pressures. |
|-------------------------|------------------|---------------------------|-----------------------------|---------------------------------------------|--------------------------------------------------------------------------------------------------------|

Abbreviations: as for Table S10

**Table S12.** Conditions that may increase the risk of adverse effects of transcranial magnetic stimulation (relative contraindications of TMS) [427]

|                                                    |                                                                                  |
|----------------------------------------------------|----------------------------------------------------------------------------------|
| Pregnancy (effects on pregnant women are unknown); | Personal or family history of seizures, including febrile seizures as an infant; |
| Metal implants in the head;                        | Previous brain neurosurgery;                                                     |
| Cardiac pacemakers;                                | Unstable major medical conditions;                                               |
| Poorly-controlled migraine headaches;              | Medications that lower seizure threshold;                                        |
| History of major head injury;                      | Neurological disorders;                                                          |
| History of stroke;                                 | Major psychiatric disorders.                                                     |

**Table S13.** Summary of characteristics and relevant results from TMS studies

| Disease | Reference            | Subject characteristics    | Sample size (M)    | Age $\pm$ SD (y)                   | Coil; Muscle; Hemisphere                                    | Protocol                                                                                                            | Meaningful clinical difference of variables measured                                                                                                                                                                               | Prognostic/discriminative information                                          | Evaluative of intervention information |
|---------|----------------------|----------------------------|--------------------|------------------------------------|-------------------------------------------------------------|---------------------------------------------------------------------------------------------------------------------|------------------------------------------------------------------------------------------------------------------------------------------------------------------------------------------------------------------------------------|--------------------------------------------------------------------------------|----------------------------------------|
| OSAS    | Demoule et al. [428] | Healthy subjects           | 13 (7M)            | 22-43                              | Circular; DI; Vertex.                                       | Single-pulse TMS; Paired-pulse TMS; Awake;                                                                          | 1. MEP in response to paired-TMS were obtained in 8 subjects;<br>2. ISI<5 ms resulted in significant inhibition; whereas >6 ms were facilitatory (maximal, 15 ms);<br>3. DI pattern matched that of the biceps brachii.            |                                                                                |                                        |
|         | Civardi et al. [330] | OSAS patients vs. Controls | 7 (4M)<br>9 (5M)   | 32.7 $\pm$ 12.7<br>36.4 $\pm$ 10.3 | Circular; FDI; right                                        | Single-pulse TMS; Awake/ sleep                                                                                      | 1. MEP lat: NS between groups, ( $\uparrow$ only during sleep);<br>2. MEP amp: NS, ( $\downarrow$ only during sleep);<br>3. MT: NS;<br>4. CSP: $\uparrow$ in OSAS                                                                  | $\downarrow$ of MEP during sleep related to $\downarrow$ of SaO <sub>2</sub> . |                                        |
|         | Grippio et al. [331] | OSAS patients vs. Controls | 10 (9M)<br>10 (8M) | 56 (31-67)<br>47 (31-61)           | Circular; FDI; dominant                                     | Single-pulse TMS; Awake every 2 hours (10:00h-18:00)                                                                | 1. MEP lat: NS;<br>2. MEP amp: NS (ratio);<br>3. CMCT: NS;<br>4. MT: NS;<br>5. CSP: $\uparrow$ in OSAS                                                                                                                             | $\downarrow$ of MEP related to $\uparrow$ of PaCO <sub>2</sub>                 |                                        |
|         | Wang et al. [429]    | Healthy subjects           | 13 M               | 42 $\pm$ 12                        | Circular or figure-of-eight; GG/DI/APB; Vertex or dominant. | Single-pulse TMS; Awake; Facilitation manoeuvre with tongue protrusion, inspiratory resistance or deep inspiration. | 1. GG MEP precedes that of DI;<br>2. The sequence of GG and DI activation is not modified by respiratory or non-respiratory manoeuvres;<br>3. GG and DI are differently influenced by these manoeuvres in terms of MEP lat and MT. |                                                                                |                                        |

|                     |                            |              |                      |                                                                  |                                                                                      |                                                                                                                                                                                                                                                                                                                 |                                                                                |
|---------------------|----------------------------|--------------|----------------------|------------------------------------------------------------------|--------------------------------------------------------------------------------------|-----------------------------------------------------------------------------------------------------------------------------------------------------------------------------------------------------------------------------------------------------------------------------------------------------------------|--------------------------------------------------------------------------------|
| Sériès et al. [430] | Healthy subjects           | 9 M          | 46±8                 | Figure-of-eight;<br><br>GG/ LVP/ PG/ alae nasi/ DI/APB; dominant | Single-pulse TMS; Awake;<br><br>TMS stimuli during different respiratory conditions. | 1. A concomitant response of the 4 studied upper airway muscles exist in the majority of cortical stimuli;<br>2. The response of these muscles was independent of the DI;<br>3. Significant relationships existed between the facilitated MEP amp/lat of alae nasi, PG, LVP and the corresponding values of GG. |                                                                                |
| Sériès et al. [333] | OSAS patients vs. Controls | 13 M<br>8 M  | 49±6<br>49±5         | Circular;<br><br>GG/ DI/ APB; dominant                           | Single-pulse TMS; Awake;<br><br>Tongue protrusion facilitation                       | 1. MEP lat: ↓in DI and GG during protrusion in OSAS;<br>2. MEP amp: ↑in GG during inspiration and ↑in ABP during tongue protrusion in OSAS;<br>3. MT: ↑difference between GG and DI during respiration in OSAS                                                                                                  | Correlation between GG latencies and AHI                                       |
| Wang et al. [332]   | OSAS patients vs. Controls | 12 M<br>12 M | 49±4<br>51±6         | Figure-of-eight;<br><br>GG;<br><br>dominant                      | Single-pulse TMS; Awake                                                              | 1. MEP lat: ↓in OSAS;<br>2. MEP amp: NS;<br>3. CMCT: ↓in OSAS;                                                                                                                                                                                                                                                  | Correlation with AHI, saturation, apnea time                                   |
| Joo et al. [335]    | OSAS patients vs. Controls | 45 M<br>44 M | 47.2±9.7<br>47.2±5.4 | Figure-of-eight;<br><br>FDI;<br><br>dominant                     | Single-pulse TMS; Paired-pulse TMS; At rest                                          | 1. MT: ↑in OSAS;<br>2. CSP: ↑in OSAS;<br>3. ICI: NS;<br>4. ICF: NS;                                                                                                                                                                                                                                             |                                                                                |
| Borel et al. [341]  | Healthy subjects           | 10 M         | 32±9                 | Double cone coil (non-focal);<br><br>GG/ DI/ LCW;                | Single-pulse TMS; Awake;<br><br>Hypercapnic stimulation.                             | 1. MEP lat: NS in DI/LCW/GG during CO <sub>2</sub> -induced increase in ventilation drive;<br>2. MEP amp: ↑in DI/LCW during CO <sub>2</sub> stimulation; NS in GG;<br>3. MT: ↓in DI/LCW during CO <sub>2</sub> stimulation; ↑ in GG.                                                                            | CO <sub>2</sub> -induced hyperventilation is associated with heightened LCW/DI |

|                         |                            |                     |                        |                                                            |                                                             |                                                                                                                             |                                                                 |                                                                                                                                    |
|-------------------------|----------------------------|---------------------|------------------------|------------------------------------------------------------|-------------------------------------------------------------|-----------------------------------------------------------------------------------------------------------------------------|-----------------------------------------------------------------|------------------------------------------------------------------------------------------------------------------------------------|
|                         |                            |                     |                        | Vertex.                                                    |                                                             |                                                                                                                             |                                                                 | corticomotor activation without modulating GG MEP response.                                                                        |
| Opie et al. [336]       | OSAS patients vs. Controls | 13 (11M)<br>11 (9M) | 42.6±10.2<br>43.0±10.3 | Figure-of-eight;<br>FDI/ADM;                               | cTBS;<br>Paired-pulse TMS;<br>Awake                         | 1. MT: ↑at rest, NS for active;<br>2. ICI: NS                                                                               |                                                                 | Lack of response to cTBS in OSAS                                                                                                   |
| Das et al. [339]        | OSAS patients vs. Controls | 13 (10M)<br>12 (8M) | 47.7±9.7<br>46.2±10.5  | dominant<br>Figure-of-eight;<br>FDI;                       | rTMS;<br>Single-pulse TMS;<br>Awake                         | 1. MEP lat: NS;<br>2. MEP amp: NS;<br>3. CMCT: NS;<br>4. MT: ↑at rest in OSAS;<br>5. CSP: ↑in OSAS                          |                                                                 | Lack of response to high-frequency rTMS over M1 in OSAS (not in controls).                                                         |
| Melo-Silva et al. [326] | OSAS patients              | 14 (11M)            | 50±14                  | Dominant<br>Figure-of-eight;<br>Submental;<br>non-dominant | Single-pulse TMS (acute);<br>PNMS;<br>Awake and sleep       | 1. MEP lat: NS wakefulness vs. sleep;<br>2. MEP amp: NS wakefulness vs. sleep;<br>3. MT: ↑in submental during sleep (NREM). | Cortico-bulbar excitability of submental muscles ↓ during NREM. | Brief recruitment of submental muscles with TMS during sleep improves upper airway mechanics without arousing patients from sleep. |
| Melo-Silva et al. [327] | OSAS patients              | 10 (9M)             | 51±13                  | Figure-of-eight;<br>Submental;<br>non-dominant             | Single-pulse TMS (consecutive);<br>PNMS;<br>Awake and sleep | 1. MEP lat: NS wakefulness vs. sleep;<br>2. MEP amp: NS wakefulness vs. sleep;<br>3. MT: ↑in submental during sleep         |                                                                 | TMS-induced consecutive twitches reduced flow limitation during sleep in OSAS.                                                     |



|      |                       |                                             |                               |                                     |                                                         |                                                         |                                                                                                                                                                                            |                                                                                                                |
|------|-----------------------|---------------------------------------------|-------------------------------|-------------------------------------|---------------------------------------------------------|---------------------------------------------------------|--------------------------------------------------------------------------------------------------------------------------------------------------------------------------------------------|----------------------------------------------------------------------------------------------------------------|
| COPD | Lanza et al. [334]    | OSAS patients vs. RLS patients vs. Controls | 14 (8M)<br>12 (4M)<br>14 (5M) | 57.9±6.02<br>61.7±11.4<br>64.4±5.37 | Figure-of-eight;<br>FDI;<br>dominant                    | Paired-pulse TMS;                                       | 1. MEP lat: ↑in OSAS;<br>2. MEP amp: ↓in OSAS;<br>3. CMCT: ↑in OSAS;<br>4. MT: ↑at rest in OSAS;<br>5. CSP: NS;<br>6. ICI: NS (ratio).                                                     |                                                                                                                |
|      | Rousseau et al. [337] | OSAS patients                               | 10 M                          | 48±11                               | Figure-of-eight;<br>GG/DI;<br>Non-dominant              | rTMS;<br>Single-pulse TMS;<br>PNMS;<br>Awake            | 1. MEP lat: NS in GG and DI;<br>2. MEP amp: ↑in GG from the second to the last rTMS expiratory train twitch; NS in DI.                                                                     | rTMS applied during expiration induced corticomotor facilitation.                                              |
|      | Rousseau et al. [338] | OSAS patients                               | 9 (8M)                        | 55.9±9.7                            | Figure-of-eight;<br>Submental/DI Sleep;<br>Non-dominant | rTMS;<br>Single-pulse TMS;<br>Sleep                     | 1. MEP lat: NS in Submental and DI;<br>2. MEP amp: ↓in submental from the first to the subsequent rTMS-induced twitch; NS in DI.<br>3. MT: ↑in submental during NREM sleep.                | rTMS does not provide any improvement of airflow-limited breaths.                                              |
|      | Borel et al. [344]    | OSAS patients vs Controls                   | 12 M<br>9 M                   | 48±10<br>45±10                      | Double cone coil (non-focal);<br>GG/DI ;<br>Vertex.     | Single-pulse TMS;<br>Awake;<br>Hypercapnic stimulation. | 1. MEP lat: ↓in DI during CO <sub>2</sub> -induced increase in ventilation drive; NS in GG;<br>2. MEP amp: ↑in DI during CO <sub>2</sub> -induced increase in ventilation drive; NS in GG. | No difference in CO <sub>2</sub> -induced responses between OSAS patients and controls.                        |
|      | Oliviero et al. [329] | AE-COPD patients vs. Controls               | 4<br>8                        | 64.8±13<br>70.4±10                  | Figure-of-eight;<br>FDI;<br>dominant                    | Single-pulse TMS;<br>Paired-pulse TMS;<br>Awake.        | 1. MT: NS (rest and active);<br>2. CSP: ↓ in AECOPD;<br>3. CMCT: NS;<br>4. ICF: NS;<br>5. ICI: : ↓in AECOPD                                                                                | O <sub>2</sub> therapy normalized FDI MT (resting and active) and ICI, also prolonged CSP duration in AE-COPD. |

|                        |                                        |        |                      |                                                                                         |                                                                              |                                                                                                                                                                                                                                                                                                                          |                                                                                                                                      |
|------------------------|----------------------------------------|--------|----------------------|-----------------------------------------------------------------------------------------|------------------------------------------------------------------------------|--------------------------------------------------------------------------------------------------------------------------------------------------------------------------------------------------------------------------------------------------------------------------------------------------------------------------|--------------------------------------------------------------------------------------------------------------------------------------|
| Hopkinson et al. [431] | COPD (stable outpatients) vs. Controls | 9<br>7 | 60.9±8.3<br>60.4±7.1 | Double cone coil (non-focal);<br><br>DI/Quadriceps/Rectus abdominis/ External oblique ; | Single-pulse TMS; Paired-pulse TMS; Awake; Voluntary facilitation.           | 1. MEP amp: at rest, ↑(DI and abdominis) in COPD; at facilitation, DI response ↑during 20% inspiratory efforts; no further ↑with >20% efforts in COPD, whereas further↑in controls at 40%-60% of inspiratory effort.<br>2. MT: ↓(DI and abdominal) in COPD;<br>3. CSP: ↓(DI and abdominal) in COPD;<br>4. ICF: ↓in COPD. |                                                                                                                                      |
| Sharshar et al. [346]  | Healthy subjects                       | 6 (5M) | 35 (25-45)           | Double cone coil (non-focal);<br><br>DI (costal and crural);<br><br>Vertex              | Single-pulse TMS; Paired-pulse TMS; PNMS; Awake; Isocapnic NIV intervention. | 1. MEP amp: ↓(costal and crural) during NIV;<br>2. ICI/ICF: MEP amp↑during NIV at facilitatory ISI ( > 9 ms)                                                                                                                                                                                                             | Depression of diaphragm motor cortex excitability during NIV.                                                                        |
| Locher et al. [345]    | Healthy subjects                       | 6 (4M) | 22-25                | Circular coil (non-focal);<br><br>DI/ APB;<br><br>Vertex.                               | Single-pulse TMS; CMS; Awake; Inspiratory resistive breathing.               | 1. MEP lat: ↓in DI after resistive breathing; NS in APB;<br>2. MEP amp: NS in DI or APB.                                                                                                                                                                                                                                 | Inspiratory resistive breathing facilitates the diaphragm response to TMS while it does not increase the automatic drive to breathe. |

|                              |                                                               |              |                     |                                                                  |                                                                                                              |                                                                                                                                                                                                                                                                                        |                                                                                                                                                                                                                                    |                                                                                                                      |
|------------------------------|---------------------------------------------------------------|--------------|---------------------|------------------------------------------------------------------|--------------------------------------------------------------------------------------------------------------|----------------------------------------------------------------------------------------------------------------------------------------------------------------------------------------------------------------------------------------------------------------------------------------|------------------------------------------------------------------------------------------------------------------------------------------------------------------------------------------------------------------------------------|----------------------------------------------------------------------------------------------------------------------|
| Mohamed-Hussein et al. [340] | AECOPD vs. Controls                                           | 41 M<br>30 M | 62.1±8.5<br>53.6±13 | Figure-of-eight;<br>FDI;<br>dominant                             | Single-pulse TMS;<br>Paired-pulse TMS;<br>Awake;                                                             | 1. MT: ↑(resting and active) in AECOPD;<br>2. CMCT: ↑in AECOPD;<br>3. CSP: ↑in AECOPD.                                                                                                                                                                                                 | Correlation between TMS parameters (MT, CMCT and CSP) and pulmonary function tests (FVC, FEV <sub>1</sub> %, FEV <sub>1</sub> ), arterial blood gases (pH, PaO <sub>2</sub> , HCO <sub>3</sub> ) and serum chloride and potassium. |                                                                                                                      |
| Hopkinson et al. [347]       | Unventilated COPD outpatients vs. Ventilated COPD outpatients | 8 M<br>6 M   | 61±9<br>62±6        | Double cone coil (non-focal);<br>DI/ Rectus abdominis;<br>Vertex | Single-pulse TMS;<br>Paired-pulse TMS;<br>Awake;<br>Acute NIV intervention on 6 users of nocturnal home NIV. | 1. MEP amp: NS between groups; Acute isocapnic NIV↓(DI) MEP amp;<br>2. MEP lat: NS;<br>3. ICF: NS;<br>4. ICI: NS.                                                                                                                                                                      | Correlation between ICI and inspiratory muscle strength; between ICF and PaCO <sub>2</sub> .                                                                                                                                       | A reduction of DI MEP during NIV, without change in response to paired stimuli.                                      |
| Straus et al. [342]          | Healthy subjects                                              | 13 (10M)     | 22-35               | Circula coil (non-focal);<br>DI/ABP;<br>Vertex                   | Single-pulse TMS;<br>Awake;<br>Hyperoxic CO <sub>2</sub> stimulation;                                        | 1. MEP lat: ↓in DI during (5% and 7%) CO <sub>2</sub> -induced increase in ventilation drive; NS in APB;<br>2. MEP amp: ↑in DI during CO <sub>2</sub> -induced increase in ventilation drive; NS in GG.<br>3. CMCT: ↓(DI) with increased concentration of CO <sub>2</sub> ; NS in APB. |                                                                                                                                                                                                                                    | Increasing the ventilatory neural drive through CO <sub>2</sub> inhalation facilitates the response of the DI to TMS |

|                                                      |                     |                                                                                                                     |          |          |                                                                                |                                                                                                                                      |                                                                                                                                                                                                                                                                                                                                   |                                                                                                                                                                   |                                                                                                  |
|------------------------------------------------------|---------------------|---------------------------------------------------------------------------------------------------------------------|----------|----------|--------------------------------------------------------------------------------|--------------------------------------------------------------------------------------------------------------------------------------|-----------------------------------------------------------------------------------------------------------------------------------------------------------------------------------------------------------------------------------------------------------------------------------------------------------------------------------|-------------------------------------------------------------------------------------------------------------------------------------------------------------------|--------------------------------------------------------------------------------------------------|
|                                                      | Luu et al. [343]    | Healthy subjects                                                                                                    | 10 (7M)  | 29.2±7.1 | Circular coil (non-focal);<br><br>Scalenes and parasternal intercostal muscle; | Single-pulse TMS; Awake;<br><br>End-tidal CO <sub>2</sub> stimulation;                                                               | 1. CSP: NS by end-tidal CO <sub>2</sub> .                                                                                                                                                                                                                                                                                         |                                                                                                                                                                   | Changing end-tidal CO <sub>2</sub> did not independently affect the duration of CSP in scalenes. |
| <b>Central respiratory paralysis patients (ICU)</b>  | Duguet et al. [432] | Central respiratory paralysis patients:<br>1. Long-term ventilator depended;<br>2. Paralysis for less than 10 weeks | 11 (7M)  | 22.9±16  | Vertex<br>Circular coil (non-focal);<br><br>DI/ APB;                           | Single-pulse TMS; PNMS;<br><br>Awake and free of sedative and psychotropic drugs;                                                    | 1. TMS failed to elicit DI EMG and ABP EMG responses in the 11 patients;<br>2. No (DI/ APB) response of TMS in 6 subjects who had not recovered any ventilator activity at 1 year;<br>3. A (DI) EMG response to TMS was recorded in 9/10 cases (with usual latencies) who exhibited spontaneous ventilator respiration at 1 year. | DI response to TMS could predict the recovery of spontaneous ventilator activity within 1 year. (Specificity: 100%, sensitivity:90%).                             |                                                                                                  |
|                                                      |                     |                                                                                                                     | 16 (12M) | 39.0±20  | Vertex.                                                                        |                                                                                                                                      |                                                                                                                                                                                                                                                                                                                                   |                                                                                                                                                                   |                                                                                                  |
| <b>Stroke (Impaired respiratory muscle function)</b> | Harraf et al. [325] | Acute ischemic stroke patients;                                                                                     | 15 (7M)  | 68.9±9.8 | Double cone coil (non-focal);                                                  | Single-pulse TMS; PNMS;                                                                                                              | 1. TMS P <sub>gas</sub> : ↓ following TMS at injured compared with uninjured hemisphere in stroke patients;                                                                                                                                                                                                                       | Measurement of P <sub>E</sub> max following TMS may assess airway clearance and complement existing methods to evaluate aspiration risk in acute stroke patients. |                                                                                                  |
|                                                      |                     | Controls                                                                                                            | 16 (8M)  | 75.8±7.0 | DI (costal and crural);<br><br>Vertex                                          | Awake;<br><br>Gastric (P <sub>gas</sub> ) and esophageal (P <sub>oes</sub> ) pressures were measured simultaneously with MEP by TMS. | 2. Correlations between PCFR and P <sub>gas</sub> or P <sub>E</sub> max;<br>3. Correlations between P <sub>gas</sub> and P <sub>E</sub> max in stroke patients.                                                                                                                                                                   |                                                                                                                                                                   |                                                                                                  |

ABP: abductor pollicis brevis muscle; ADM: abductor digit minimi muscle; AECOPD: acute exacerbation of COPD; AHI: apnea-hypopnea index; CMCT: central motor conduction time; CMS: Cervical magnetic stimulation; COPD: chronic obstructive pulmonary disease; CSP: cortical silent period; DI: diaphragmatic muscle; FDI: first dorsal interosseus muscle; FVC, forced vital capacity; FEV<sub>1</sub>, forced expiratory volume in one second; GG: genioglossus muscle; ICF: intracortical facilitation; ICI: intracortical inhibition; ISI: interstimulus interval; ICU: intensive care unit; LCW: lower chest wall; M: male; M1: primary motor cortex; MEP amp: MEP amplitude; MEP lat: MEP latency; MEP: motor evoked potentials; MT: motor threshold; NIV: isocapnic volume cycled ventilation delivered noninvasively; NS: not significant; OSAS: obstructive sleep apnea syndrome; PCFR: peak voluntary cough flow rates; P<sub>E</sub>max: maximum

static expiratory pressure; PNMS: phrenic nerve magnetic stimulation; RLS : restless legs syndrom; rMT: resting motor threshold; rTMS: repetitive transcranial magnetic stimulation; SD: standard deviation; TBS: theta burst stimulation; TMS Pgas: TMS gastric pressure twitch.

**Table S14.** Advantages and limitations of the different respiratory muscle tests in children (adapted from [38, 433]).

|                                                             | Volitional /<br>Non volitional | Specificity of the test for<br>a specific (type of)<br>muscle | Advantages (+) / Limitations (-)                                                                                                                                                                                                                                   |
|-------------------------------------------------------------|--------------------------------|---------------------------------------------------------------|--------------------------------------------------------------------------------------------------------------------------------------------------------------------------------------------------------------------------------------------------------------------|
| <b>Non invasive tests</b>                                   |                                |                                                               |                                                                                                                                                                                                                                                                    |
| Breathing pattern                                           | NV                             | No                                                            | (+)Can be performed at any age<br>(-)Requires quiet breathing (sleep in infants)                                                                                                                                                                                   |
| <i>Lung volumes</i>                                         |                                |                                                               | (+)Easy to perform, largely used in children > 4–8 years old; sensitive for assessing progress                                                                                                                                                                     |
| Vital capacity (sitting and supine)                         | V                              | Inspiratory and expiratory                                    | in moderate to severe respiratory muscle weakness                                                                                                                                                                                                                  |
| Residual volume                                             | V                              | Expiratory                                                    | (-)Requires cooperation; poor specificity for the diagnosis of respiratory muscle weakness                                                                                                                                                                         |
| Total lung capacity                                         | V                              | Inspiratory                                                   |                                                                                                                                                                                                                                                                    |
| Maximal static pressures                                    | V                              | Inspiratory (PImax)<br>Expiratory (PEmax)                     | (+)Simple but difficult to perform, largely used in children > 6–8 years old<br>(-)Requires full cooperation                                                                                                                                                       |
| Sniff nasal inspiratory pressure (SNIP)                     | V                              | Inspiratory                                                   | (+)Natural maneuver, easy to perform in children > 2 years old, playful, visual feedback<br>(-)Requires cooperation; glottic closure or airway characteristics may prevent adequate equilibration; not reliable in case of rhinitis or hypertrophy of the adenoids |
| Peak cough flow / peak expiratory flow                      | V                              | Expiratory                                                    | (+)Easy to perform, largely used in children > 4–8 years old<br>(-)Requires cooperation                                                                                                                                                                            |
| Mouth pressure during a maximal whistle                     | V                              |                                                               | (+)Natural maneuver, easy to perform in children > 2 years old, playful, audible feedback<br>(-)Requires cooperation, lack of reference values                                                                                                                     |
| Crying mouth pressure                                       | V                              | Inspiratory and expiratory                                    | (+)Easily to perform in the newborn<br>(-)High variability; glottic closure should be prevented                                                                                                                                                                    |
| Tension time index                                          | V                              | Inspiratory muscles (TTmus)                                   | (+)Evaluates muscle endurance<br>(-)Requires the measurement of occlusion pressure (P0.1), PImax/SNIP and breathing pattern                                                                                                                                        |
| <b>Invasive tests</b>                                       |                                |                                                               |                                                                                                                                                                                                                                                                    |
| Breathing pattern with P <sub>oes</sub> and P <sub>ga</sub> | NV                             | Diaphragm                                                     | (+)Can be performed at any age<br>(-)Mildly uncomfortable, requires quiet breathing (sleep in infants)                                                                                                                                                             |
| P <sub>oes</sub> and P <sub>di</sub> during a maximal sniff | V                              | Inspiratory and diaphragm                                     | (+)Natural maneuver, easy to perform in children > 2 years old, playful, visual feedback<br>(-)Mildly uncomfortable; requires cooperation; values may be less than maximal static values because of                                                                |

|                                                 |    |                                                |                                                                                                                                                                                       |
|-------------------------------------------------|----|------------------------------------------------|---------------------------------------------------------------------------------------------------------------------------------------------------------------------------------------|
|                                                 |    |                                                | shortening of the inspiratory muscles                                                                                                                                                 |
| $P_{ga}$ during a maximal cough                 | V  | Expiratory                                     | (+)Natural maneuver, easy to perform, can be performed in children > 2 years old, playful, visual feedback<br>(-)Mildly uncomfortable; requires cooperation; lack of reference values |
| $P_{oes}$ and $P_{ga}$ during a maximal whistle |    |                                                | (+)Natural maneuver, easy to perform in children > 2 years old, playful, audible feedback<br>(-)Mildly uncomfortable; requires cooperation, lack of reference values                  |
| Crying $P_{di}$                                 | V  | Diaphragm                                      | (+)Can be performed in the newborn<br>(-)Mildly uncomfortable; high variability                                                                                                       |
| Tension time index                              | V  | Diaphragm (TTdi)<br>Inspiratory muscles (TTes) | (+)Evaluates muscle endurance<br>(-)Mildly uncomfortable; requires the measurement of P <sub>lmax</sub> /Sniff and breathing pattern                                                  |
| <i>Sleep study</i>                              |    |                                                |                                                                                                                                                                                       |
| Polysomnography / polygraphy                    | NV | No                                             | (+)Can be performed at any age<br>(-)Labor-intensive, expensive, limited accessibility                                                                                                |

V: volitional, NV: non volitional,  $P_{oes}$ : esophageal pressure,  $P_{ga}$ : gastric pressure,  $P_{di}$ : transdiaphragmatic pressure, P<sub>lmax</sub>: maximal static inspiratory pressure, P<sub>E</sub><sub>max</sub>: maximal static expiratory pressure, TT<sub>mus</sub>: non invasive tension time of the respiratory muscles, P<sub>0.1</sub>: pressure generated in the first 100 milliseconds of inspiration against an occluded airway, SNIP: Sniff nasal inspiratory pressure, TT<sub>di</sub>: tension time index of the diaphragm, TT<sub>es</sub>: tension time index of the inspiratory muscles.

## Figures

**Figure S1.** Tracings of lung volume (Volume) and oesophageal pressure ( $P_{oes}$ ) from inspiratory capacity (IC) manoeuvres taken during resting breathing, at 60watts (iso-WR) and peak-exercise from one representative PAH patient who reduced IC (or increased end-expiratory lung volume, i.e., EELV) during exercise (PAH-H, *upper left panel*) and one who increased IC (or reduced EELV) (PAH-NH, *lower left panel*). Please note that, regardless of changes in IC during exercise, dynamic peak inspiratory  $P_{oes}$  recorded during IC manoeuvres ( $P_{oes,IC}$ ) is remarkably preserved in both PAH-H (upper left panel) and PAH-NH (lower left panel). Maximal and tidal flow-volume loops (average data) are shown at rest and at peak-exercise in PAH-H (upper right panel) and PAH-NH (lower right panel). Tidal flow-volume loops are provided at rest (solid line) and at peak-exercise (dashed line). Note a significant decrease in dynamic inspiratory capacity during exercise in PAH-H compared with PAH-NH. Abbreviations: TLC=total lung capacity.

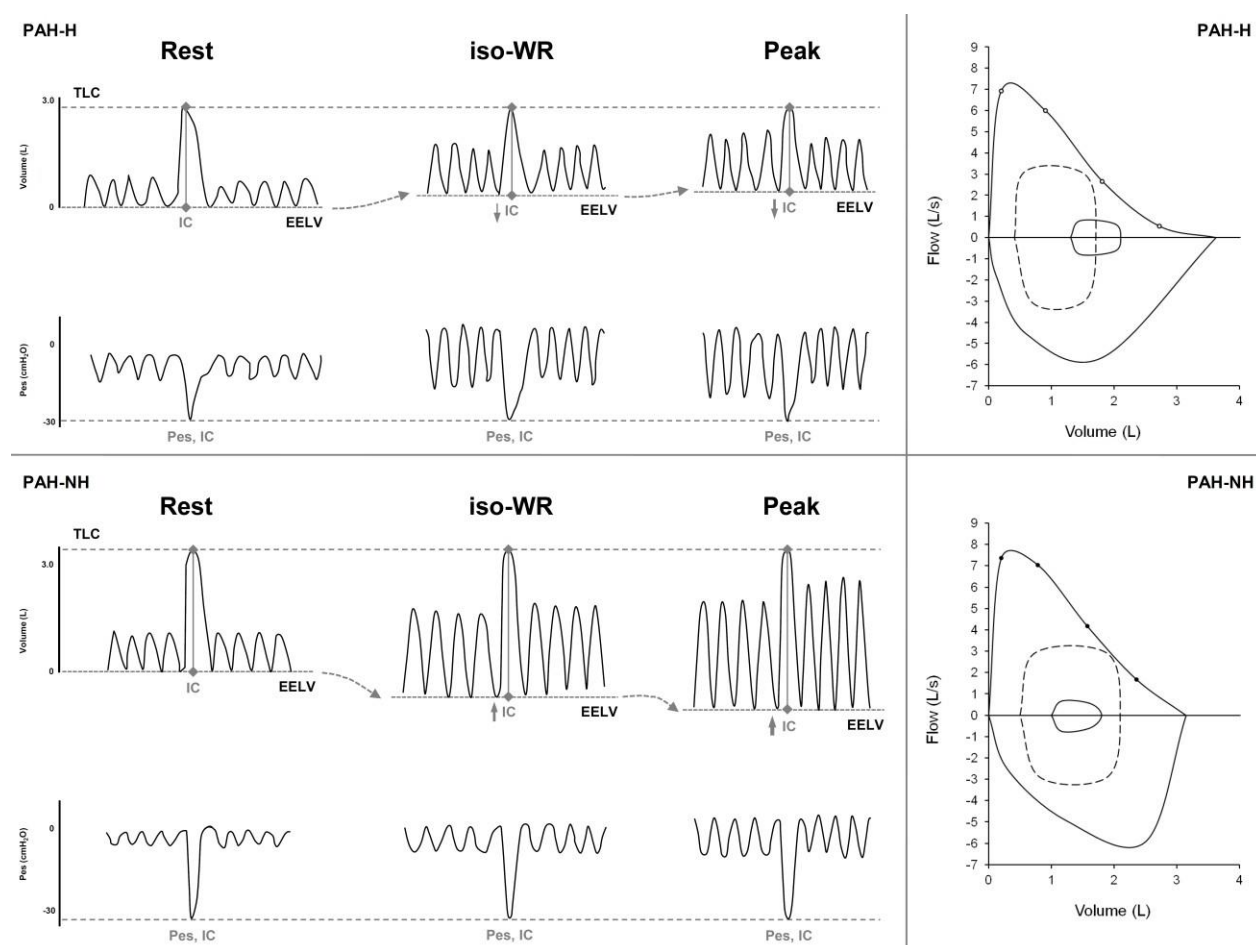



**Figure S2.** Improvements in inspiratory muscle endurance capacity assessed by incremental (Pmax) or constant load (Tlim) tests in response to inspiratory muscle training (IMT) in patients with chronic obstructive pulmonary diseases. MTL = mechanical threshold loading, TFRL = tapered flow resistive loading.

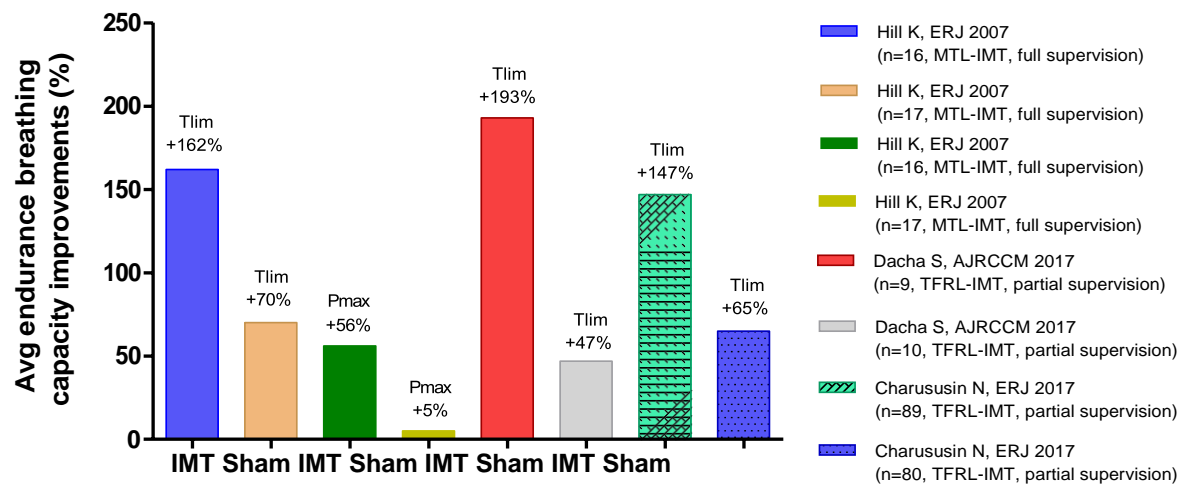

**Figure S3.** Changes in respiratory muscle endurance measured by a constant-load hyperpnoea test following respiratory muscle endurance training (RMET) or a control period (CON, no training) in healthy subjects. From [434].

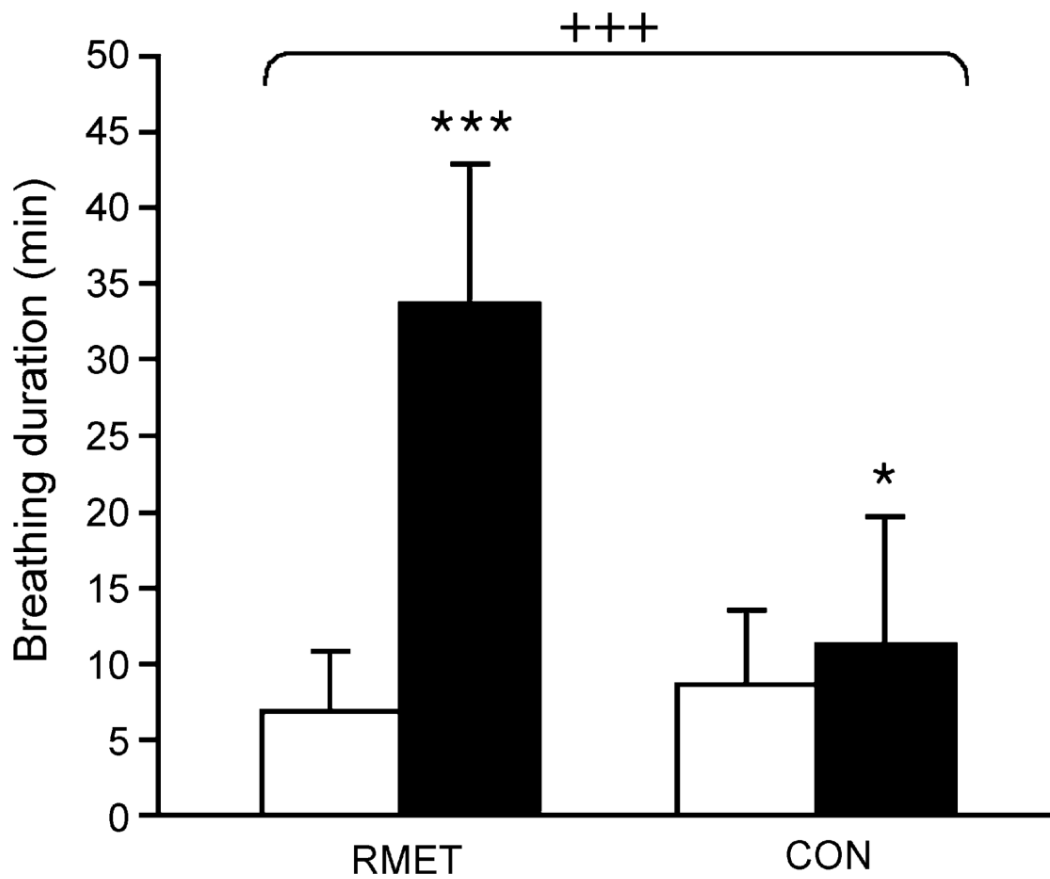

**Figure S4.** Dyspnoea score perceived during cycling according to maximal inspiratory pressure (P<sub>Imax</sub>) and forced expiratory volume in 1 second (FEV<sub>1</sub>) based on data collected in 550 subjects exercised for clinical purposes and grouped [435].

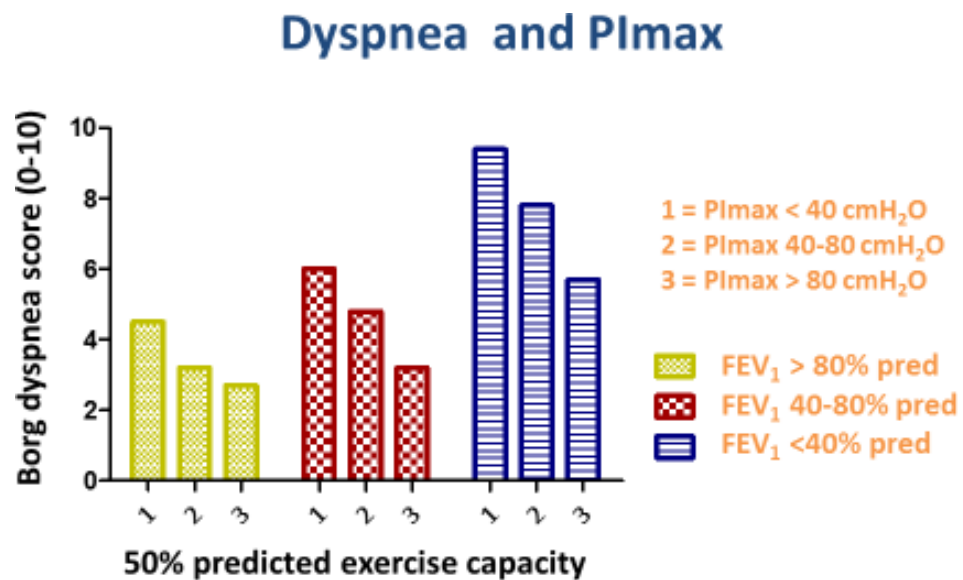

Supplement: inline-supplementary-material-1 [file inline-supplementary-material-1.pdf]
